# Supplementary material for: SARS-CoV-2 S protein:ACE2 interaction reveals novel allosteric targets
Source: eLife. 2021 Feb 8;10:e63646. doi: 10.7554/eLife.63646 (PMC7932696; doi:10.7554/eLife.63646)
Supplement: Figure 2—source data 1. [file elife-63646-fig2-data1.xlsx]

## Sheet: Figure 2-source data 1
Figure 2-source data 1: Relative Fractional deuterium uptake values for S protein peptides at indicated labeling times
				1 min			10 min
Start	End	Sequence	MaxUptake	RFU	SD		RFU	SD
21	31	RTQLPPAYTNS	8	0.1661	0.00434		0.2401	0.007221
32	42	FTRGVYYPDKV	9	0.1466	0.003285		0.1993	0.002367
32	48	FTRGVYYPDKVFRSSVL	15	0.1504	0.002249		0.2267	0.001333
33	42	TRGVYYPDKV	8	0.2302	0.00609		0.2584	0.005404
36	48	VYYPDKVFRSSVL	11	0.3069	0.003627		0.3151	0.003504
49	55	HSTQDLF	6	0.0886	0.00299		0.1497	0.00367
60	83	SNVTWFHAIHVSGTNGTKRFDNPV	22	0.1768	0.005619		0.2014	0.004672
85	91	PFNDGVY	5	0.0577	0.004367		0.1239	0.008594
92	103	FASTEKSNIIRG	11	0.1699	0.00263		0.2271	0.001689
92	106	FASTEKSNIIRGWIF	14	0.1719	0.003054		0.2544	0.001834
92	110	FASTEKSNIIRGWIFGTTL	18	0.16	0.002444		0.2233	0.004084
93	103	ASTEKSNIIRG	10	0.086	0.002397		0.1279	0.00586
94	103	STEKSNIIRG	9	0.1766	0.001684		0.2456	0.001548
95	103	TEKSNIIRG	8	0.1079	0.00169		0.2155	0.002804
104	110	WIFGTTL	6	0.1172	0.002291		0.2447	0.005472
107	117	GTTLDSKTQSL	10	0.115	0.003619		0.2022	0.018076
111	117	DSKTQSL	6	0.1095	0.004181		0.1486	0.00659
111	118	DSKTQSLL	7	0.0979	0.00181		0.1006	0.000545
136	143	CNDPFLGV	6	0.3034	0.006834		0.3605	0.009962
169	176	EYVSQPFL	6	0.417	0.009812		0.4315	0.004328
170	176	YVSQPFL	5	0.3667	0.004063		0.381	0.001775
177	186	MDLEGKQGNF	9	0.2326	0.009169		0.2348	0.010066
177	191	MDLEGKQGNFKNLRE	14	0.2008	0.012665		0.257	0.007739
178	191	DLEGKQGNFKNLRE	13	0.1974	0.005951		0.2584	0.004816
180	191	EGKQGNFKNLRE	11	0.1546	0.006297		0.2353	0.004069
181	191	GKQGNFKNLRE	10	0.2122	0.005475		0.2938	0.009515
184	191	GNFKNLRE	7	0.1893	0.00481		0.279	0.00633
192	199	FVFKNIDG	7	0.1764	0.001308		0.1959	0.005567
192	200	FVFKNIDGY	8	0.1614	0.005677		0.217	0.003354
192	201	FVFKNIDGYF	9	0.1675	0.002208		0.2353	0.001966
193	201	VFKNIDGYF	8	0.1908	0.007197		0.2449	0.007141
194	200	FKNIDGY	6	0.1986	0.003627		0.2668	0.006928
194	201	FKNIDGYF	7	0.1854	0.003072		0.2622	0.002146
195	201	KNIDGYF	6	0.1751	0.004403		0.2719	0.004286
200	212	YFKIYSKHTPINL	11	0.1313	0.004349		0.1369	0.005268
201	212	FKIYSKHTPINL	10	0.1374	0.00217		0.1515	0.001819
213	220	VRDLPQGF	6	0.2986	0.005794		0.3037	0.003783
213	223	VRDLPQGFSAL	9	0.256	0.008291		0.2651	0.005454
213	228	VRDLPQGFSALEPLVD	13	0.1734	0.001238		0.2509	0.007637
221	228	SALEPLVD	6	0.0546	0.003914		0.2091	0.007461
221	229	SALEPLVDL	7	0.0513	0.003334		0.2051	0.007956
242	264	LALHRSYLTPGDSSSGWTAGAAA	21	0.3072	0.005489		0.3252	0.003782
243	255	ALHRSYLTPGDSS	11	0.0423	0.00398		0.0811	0.001409
243	257	ALHRSYLTPGDSSSG	13	0.169	0.004211		0.1624	0.004154
245	257	HRSYLTPGDSSSG	11	0.193	0.00453		0.2021	0.003851
245	264	HRSYLTPGDSSSGWTAGAAA	18	0.3098	0.005309		0.3	0.002216
245	265	HRSYLTPGDSSSGWTAGAAAY	19	0.2874	0.001333		0.2869	0.002387
265	271	YYVGYLQ	6	0.0841	0.004163		0.1633	0.004942
265	276	YYVGYLQPRTFL	10	0.096	0.002316		0.1697	0.002334
266	276	YVGYLQPRTFL	9	0.0973	0.004749		0.1581	0.004647
267	276	VGYLQPRTFL	8	0.0983	0.004296		0.1694	0.004289
289	303	VDCALDPLSETKCTL	13	0.2009	0.005929		0.3392	0.004489
291	299	CALDPLSET	7	0.2289	0.006184		0.3285	0.006849
291	301	CALDPLSETKC	9	0.1956	0.007609		0.3163	0.001655
291	303	CALDPLSETKCTL	11	0.1795	0.003886		0.2887	0.000955
294	303	DPLSETKCTL	8	0.2524	0.007014		0.4088	0.003232
295	303	PLSETKCTL	7	0.1744	0.014532		0.2693	0.00578
304	313	KSFTVEKGIY	9	0.2872	0.00529		0.3505	0.006474
304	317	KSFTVEKGIYQTSN	13	0.3003	0.007525		0.3731	0.006898
304	318	KSFTVEKGIYQTSNF	14	0.3237	0.005871		0.379	0.003656
306	313	FTVEKGIY	7	0.3091	0.005434		0.3741	0.007551
306	317	FTVEKGIYQTSN	11	0.3347	0.017224		0.4012	0.011218
306	318	FTVEKGIYQTSNF	12	0.3167	0.006268		0.3861	0.006591
310	318	KGIYQTSNF	8	0.236	0.005219		0.3156	0.007195
318	325	FRVQPTES	6	0.3364	0.000978		0.3517	0.006763
318	326	FRVQPTESI	7	0.315	0.010101		0.4218	0.014023
324	334	ESIVRFPNITN	9	0.1233	0.023617		0.1815	0.025334
327	338	VRFPNITNLCPF	9	0.4328	0.004106		0.5463	0.003805
337	348	PFGEVFNATRFA	10	0.0516	0.001877		0.1751	0.005179
340	359	EVFNATRFASVYAWNRKRIS	19	0.1241	0.001482		0.1846	0.007008
348	361	ASVYAWNRKRISNC	13	0.1289	0.003124		0.2108	0.007587
351	361	YAWNRKRISNC	10	0.1259	0.00692		0.1791	0.009614
356	375	KRISNCVADYSVLYNSASFS	19	0.102	0.004032		0.1365	0.002772
375	387	STFKCYGVSPTKL	11	0.341	0.005782		0.3686	0.00255
377	387	FKCYGVSPTKL	9	0.3498	0.009762		0.3858	0.00949
378	387	KCYGVSPTKL	8	0.3647	0.004396		0.3911	0.005121
386	407	KLNDLCFTNVYADSFVIRGDEV	21	0.1462	0.003681		0.308	0.001019
393	399	TNVYADS	6	0.0485	0.001179		0.1425	0.006827
393	400	TNVYADSF	7	0.0413	0.003551		0.1106	0.010307
400	406	FVIRGDE	6	0.033	0.003957		0.064	0.002752
400	416	FVIRGDEVRQIAPGQTG	15	0.2555	0.000942		0.2841	0.002823
400	421	FVIRGDEVRQIAPGQTGKIADY	20	0.1712	0.001433		0.1777	0.002958
400	422	FVIRGDEVRQIAPGQTGKIADYN	21	0.1228	0.001512		0.1966	0.002222
401	420	VIRGDEVRQIAPGQTGKIAD	18	0.1529	0.003424		0.2372	0.005301
401	421	VIRGDEVRQIAPGQTGKIADY	19	0.1261	0.00388		0.2008	0.005784
402	413	IRGDEVRQIAPG	10	0.141	0.00726		0.2261	0.00367
407	420	VRQIAPGQTGKIAD	12	0.1718	0.003808		0.2585	0.002569
407	421	VRQIAPGQTGKIADY	13	0.1543	0.004703		0.2467	0.003031
407	422	VRQIAPGQTGKIADYN	14	0.1509	0.001761		0.2401	0.001938
412	420	PGQTGKIAD	7	0.2036	0.005354		0.2948	0.007331
421	429	YNYKLPDDF	7	0.0783	0.002912		0.1322	0.002773
422	431	NYKLPDDFTG	8	0.0855	0.00223		0.1141	0.004836
423	429	YKLPDDF	5	0.1122	0.004056		0.1423	0.005048
423	431	YKLPDDFTG	7	0.0972	0.00304		0.1161	0.003163
425	431	LPDDFTG	5	0.0899	0.007946		0.1143	0.015798
432	441	CVIAWNSNNL	9	0.2251	0.001761		0.239	0.000828
433	448	VIAWNSNNLDSKVGGN	15	0.2731	0.001724		0.2836	0.002691
434	441	IAWNSNNL	7	0.0553	0.006832		0.0769	0.008211
442	449	DSKVGGNY	7	0.3352	0.002049		0.3342	0.005404
442	452	DSKVGGNYNYL	10	0.3359	0.004294		0.366	0.005878
444	452	KVGGNYNYL	8	0.32	0.004214		0.3678	0.007597
453	467	YRLFRKSNLKPFERD	13	0.0822	0.009489		0.175	0.009133
456	467	FRKSNLKPFERD	10	0.0793	0.004642		0.2003	0.007351
456	469	FRKSNLKPFERDIS	12	0.1672	0.003522		0.2816	0.008321
456	470	FRKSNLKPFERDIST	13	0.1747	0.001297		0.2608	0.001358
456	471	FRKSNLKPFERDISTE	14	0.2189	0.008038		0.3106	0.008787
471	486	EIYQAGSTPCNGVEGF	14	0.3122	0.008394		0.3154	0.008227
471	487	EIYQAGSTPCNGVEGFN	15	0.3274	0.003484		0.3291	0.009478
472	486	IYQAGSTPCNGVEGF	13	0.3179	0.009145		0.3109	0.008235
472	487	IYQAGSTPCNGVEGFN	14	0.329	0.000553		0.3394	0.005835
476	498	GSTPCNGVEGFNCYFPLQSYGFQ	20	0.3953	0.005802		0.4257	0.007171
477	500	STPCNGVEGFNCYFPLQSYGFQPT	20	0.3828	0.008209		0.4222	0.008667
479	486	PCNGVEGF	6	0.3566	0.010578		0.3547	0.008193
487	494	NCYFPLQS	6	0.2714	0.008466		0.383	0.010049
487	495	NCYFPLQSY	7	0.2372	0.003285		0.3924	0.00532
488	495	CYFPLQSY	6	0.1927	0.007428		0.3795	0.004746
488	496	CYFPLQSYG	7	0.2281	0.022882		0.3959	0.006373
488	502	CYFPLQSYGFQPTNG	12	0.2496	0.007729		0.3411	0.005961
490	512	FPLQSYGFQPTNGVGYQPYRVVV	19	0.2464	0.001335		0.2884	0.004191
491	510	PLQSYGFQPTNGVGYQPYRV	16	0.2965	0.003245		0.3328	0.00214
491	512	PLQSYGFQPTNGVGYQPYRVVV	18	0.2597	0.002773		0.2903	0.004229
495	510	YGFQPTNGVGYQPYRV	13	0.2828	0.003005		0.2838	0.002643
495	512	YGFQPTNGVGYQPYRVVV	15	0.2393	0.006439		0.2401	0.003287
495	513	YGFQPTNGVGYQPYRVVVL	16	0.24	0.008004		0.2699	0.003685
496	510	GFQPTNGVGYQPYRV	12	0.2802	0.002599		0.2782	0.003512
503	510	VGYQPYRV	6	0.1785	0.006992		0.1886	0.000635
514	533	SFELLHAPATVCGPKKSTNL	17	0.2329	0.004599		0.2599	0.003966
515	533	FELLHAPATVCGPKKSTNL	16	0.2187	0.005001		0.2458	0.006699
516	533	ELLHAPATVCGPKKSTNL	15	0.1989	0.006751		0.2159	0.016627
517	532	LLHAPATVCGPKKSTN	13	0.1678	0.015276		0.2043	0.005551
517	533	LLHAPATVCGPKKSTNL	14	0.2088	0.012254		0.2344	0.011145
518	533	LHAPATVCGPKKSTNL	13	0.2141	0.016594		0.2476	0.00778
521	533	PATVCGPKKSTNL	10	0.2324	0.006415		0.2586	0.001259
534	541	VKNKCVNF	7	0.1201	0.001814		0.2584	0.008599
542	552	NFNGLTGTGVL	10	0.1639	0.006578		0.3017	0.000511
543	555	FNGLTGTGVLTES	12	0.1433	0.003323		0.3011	0.007272
544	552	NGLTGTGVL	8	0.2951	0.003492		0.3011	0.002907
546	552	LTGTGVL	6	0.1661	0.002129		0.3296	0.001772
553	564	TESNKKFLPFQQ	10	0.3685	0.002487		0.3625	0.004207
553	565	TESNKKFLPFQQF	11	0.3128	0.004715		0.3022	0.004555
553	568	TESNKKFLPFQQFGRD	14	0.2816	0.003455		0.2877	0.009743
555	568	SNKKFLPFQQFGRD	12	0.3162	0.002943		0.3228	0.005967
569	575	IADTTDA	6	0.213	0.003324		0.2272	0.000955
569	581	IADTTDAVRDPQT	11	0.2218	0.001441		0.3346	0.001085
569	582	IADTTDAVRDPQTL	12	0.2105	0.002079		0.3272	0.006905
569	583	IADTTDAVRDPQTLE	13	0.2276	0.007167		0.3824	0.002609
575	582	AVRDPQTL	6	0.2409	0.002725		0.3922	0.001428
575	583	AVRDPQTLE	7	0.2509	0.002235		0.452	0.005895
576	582	VRDPQTL	5	0.27	0.00625		0.4028	0.003654
576	583	VRDPQTLE	6	0.2465	0.001187		0.4381	0.003991
584	592	ILDITPCSF	7	0.1827	0.004874		0.3024	0.007785
584	596	ILDITPCSFGGVS	11	0.2375	0.00228		0.3417	0.002296
585	592	LDITPCSF	6	0.2348	0.005235		0.3622	0.005314
586	592	DITPCSF	5	0.2052	0.001726		0.2881	0.002205
586	596	DITPCSFGGVS	9	0.2746	0.005716		0.348	0.007477
599	615	TPGTNTSNQVAVLYQDV	15	0.2378	0.00731		0.2508	0.004014
617	632	CTEVPVAIHADQLTPT	13	0.1521	0.003604		0.1721	0.007295
621	633	PVAIHADQLTPTW	10	0.2837	0.009387		0.2806	0.00428
627	633	DQLTPTW	5	0.3926	0.004147		0.4181	0.008066
627	635	DQLTPTWRV	7	0.4566	0.00616		0.4709	0.006522
627	643	DQLTPTWRVYSTGSNVF	15	0.4471	0.004909		0.49	0.006224
634	642	RVYSTGSNV	8	0.341	0.002609		0.3609	0.00308
634	643	RVYSTGSNVF	9	0.2703	0.005724		0.2994	0.009663
636	642	YSTGSNV	6	0.3427	0.009174		0.3659	0.011258
636	643	YSTGSNVF	7	0.2334	0.003384		0.2728	0.007037
642	650	VFQTRAGCL	8	0.2645	0.003817		0.3279	0.003559
643	650	FQTRAGCL	7	0.2526	0.00328		0.3337	0.008886
644	650	QTRAGCL	6	0.2972	0.001944		0.37	0.005534
648	665	GCLIGAEHVNNSYECDIP	16	0.0577	0.006031		0.0806	0.000924
662	671	CDIPIGAGIC	8	0.2742	0.007398		0.3796	0.010758
664	671	IPIGAGIC	6	0.333	0.006796		0.4242	0.004146
664	673	IPIGAGICAS	8	0.2611	0.004111		0.345	0.008013
665	671	PIGAGIC	5	0.4903	0.006744		0.628	0.001758
672	686	ASYQTQTNSPGSASS	13	0.3683	0.001112		0.3899	0.006884
672	690	ASYQTQTNSPGSASSVASQ	17	0.3945	0.003324		0.3961	0.001622
672	692	ASYQTQTNSPGSASSVASQSI	19	0.3533	0.001622		0.3759	0.003473
672	694	ASYQTQTNSPGSASSVASQSIIA	21	0.4051	0.003693		0.4108	0.009148
673	690	SYQTQTNSPGSASSVASQ	16	0.3082	0.007114		0.3341	0.006237
674	690	YQTQTNSPGSASSVASQ	15	0.3068	0.001024		0.3439	0.007195
674	694	YQTQTNSPGSASSVASQSIIA	19	0.4306	0.000155		0.4432	0.002066
675	690	QTQTNSPGSASSVASQ	14	0.3916	0.00407		0.3998	0.001046
675	694	QTQTNSPGSASSVASQSIIA	18	0.3703	0.002487		0.4094	0.007144
688	695	ASQSIIAY	7	0.102	0.006633		0.2405	0.009338
693	699	IAYTMSL	6	0.5517	0.003416		0.5733	0.005304
695	702	YTMSLGAE	7	0.4561	0.003641		0.4494	0.005872
696	704	TMSLGAENS	8	0.3712	0.001112		0.3795	0.002064
700	706	GAENSVA	6	0.3624	0.001868		0.3593	0.003708
715	730	PTNFTISVTTEILPVS	13	0.1547	0.00112		0.2476	0.004126
724	731	TEILPVSM	6	0.0943	0.005682		0.1301	0.006148
725	731	EILPVSM	5	0.0339	0.00473		0.0702	0.010082
728	739	PVSMTKTSVDCT	10	0.3078	0.001855		0.4033	0.001968
732	739	TKTSVDCT	7	0.2403	0.000671		0.3338	0.002589
732	741	TKTSVDCTMY	9	0.2337	0.00512		0.4243	0.005828
740	748	MYICGDSTE	8	0.2579	0.003093		0.3551	0.007256
741	748	YICGDSTE	7	0.1953	0.005158		0.2319	0.002678
742	748	ICGDSTE	6	0.2062	0.004039		0.2214	0.006242
753	759	LLQYGSF	6	0.3196	0.008801		0.3252	0.00469
763	769	LNRALTG	6	0.177	0.00336		0.3573	0.003547
764	771	NRALTGIA	7	0.1504	0.001198		0.3169	0.00262
770	780	IAVEQDKNTQE	10	0.0646	0.002586		0.2078	0.001816
770	781	IAVEQDKNTQEV	11	0.0594	0.004609		0.1888	0.002215
770	782	IAVEQDKNTQEVF	12	0.0706	0.001541		0.1709	0.00063
774	782	QDKNTQEVF	8	0.0639	0.001482		0.17	0.002023
781	802	VFAQVKQIYKTPPIKDFGGFNF	19	0.1462	0.002107		0.1897	0.008333
783	796	AQVKQIYKTPPIKD	11	0.4487	0.00617		0.4562	0.009463
784	796	QVKQIYKTPPIKD	10	0.4961	0.010584		0.4869	0.002666
800	815	FNFSQILPDPSKPSKR	12	0.2531	0.005881		0.2671	0.009124
821	828	LLFNKVTL	7	0.3265	0.006301		0.3351	0.007607
822	828	LFNKVTL	6	0.3721	0.003569		0.3563	0.007523
822	833	LFNKVTLADAGF	11	0.3591	0.004869		0.371	0.0034
823	832	FNKVTLADAG	9	0.3905	0.006128		0.3753	0.00786
823	833	FNKVTLADAGF	10	0.3395	0.005227		0.3354	0.007117
824	833	NKVTLADAGF	9	0.4044	0.007318		0.393	0.010199
833	841	FIKQYGDCL	8	0.3302	0.005268		0.3348	0.005318
834	840	IKQYGDC	6	0.3132	0.00947		0.3154	0.00207
834	841	IKQYGDCL	7	0.319	0.005498		0.3178	0.005235
834	848	IKQYGDCLGDIAARD	14	0.3758	0.001782		0.3651	0.003442
842	848	GDIAARD	6	0.412	0.002171		0.4129	0.002239
848	862	DLICAQKFNGLTVLP	13	0.1441	0.008479		0.2327	0.002349
852	858	AQKFNGL	6	0.2703	0.00804		0.3232	0.002222
858	865	LTVLPPLL	5	0.347	0.007801		0.3472	0.004285
858	866	LTVLPPLLT	6	0.4375	0.003635		0.435	0.005295
859	865	TVLPPLL	4	0.3157	0.006779		0.3327	0.004653
859	866	TVLPPLLT	5	0.3787	0.002235		0.3818	0.007831
870	877	IAQYTSAL	7	0.2036	0.005398		0.3464	0.007082
877	885	LLAGTITSG	8	0.4525	0.006723		0.4784	0.004565
877	886	LLAGTITSGW	9	0.2871	0.004672		0.2879	0.002229
878	885	LAGTITSG	7	0.3937	0.003821		0.4124	0.006251
878	891	LAGTITSGWTFGAG	13	0.5203	0.009779		0.5382	0.000627
878	893	LAGTITSGWTFGAGAA	15	0.395	0.000802		0.4183	0.001964
886	893	WTFGAGAA	7	0.4313	0.004098		0.4473	0.006648
886	898	WTFGAGAALQIPF	11	0.0816	0.00468		0.1457	0.004771
889	898	GAGAALQIPF	8	0.1643	0.004035		0.3318	0.006021
892	899	AALQIPFA	6	0.5146	0.006067		0.504	0.010487
892	901	AALQIPFAMQ	8	0.5156	0.003827		0.5149	0.005035
892	902	AALQIPFAMQM	9	0.541	0.004731		0.5462	0.004604
894	901	LQIPFAMQ	6	0.4281	0.00721		0.4407	0.004944
894	902	LQIPFAMQM	7	0.4918	0.003393		0.5082	0.003535
902	916	MAYRFNGIGVTQNVL	14	0.4127	0.005699		0.5343	0.003739
903	916	AYRFNGIGVTQNVL	13	0.3482	0.002594		0.4424	0.005241
904	916	YRFNGIGVTQNVL	12	0.3936	0.00438		0.4951	0.001628
905	916	RFNGIGVTQNVL	11	0.0202	0.00176		0.0475	0.006787
907	913	NGIGVTQ	6	0.3634	0.002059		0.4596	0.008135
907	916	NGIGVTQNVL	9	0.4177	0.004613		0.5154	0.007186
909	916	IGVTQNVL	7	0.395	0.002395		0.4864	0.002439
917	924	YENQKLIA	7	0.2887	0.00394		0.4095	0.009257
923	930	IANQFNSA	7	0.1061	0.006878		0.2939	0.00391
923	938	IANQFNSAIGKIQDSL	15	0.2929	0.00212		0.4019	0.005718
923	941	IANQFNSAIGKIQDSLSST	18	0.181	0.002017		0.1793	0.009465
923	945	IANQFNSAIGKIQDSLSSTASAL	22	0.409	0.00805		0.4797	0.002116
925	938	NQFNSAIGKIQDSL	13	0.3285	0.004593		0.4373	0.002643
927	945	FNSAIGKIQDSLSSTASAL	18	0.456	0.003815		0.4932	0.004743
928	936	NSAIGKIQD	8	0.3277	0.000913		0.3985	0.001705
928	938	NSAIGKIQDSL	10	0.3755	0.004638		0.4249	0.004103
928	945	NSAIGKIQDSLSSTASAL	17	0.4601	0.004741		0.4886	0.00621
931	938	IGKIQDSL	7	0.3077	0.004198		0.3337	0.005339
932	943	GKIQDSLSSTAS	11	0.4111	0.006094		0.39	0.006407
937	945	SLSSTASAL	8	0.4175	0.002127		0.4118	0.00073
939	945	SSTASAL	6	0.4108	0.00073		0.3984	0.006168
939	956	SSTASALGKLQDVVNQNA	17	0.5084	0.005602		0.5253	0.002874
939	961	SSTASALGKLQDVVNQNAQALNT	22	0.5536	0.008787		0.5797	0.003784
946	954	GKLQDVVNQ	8	0.4289	0.001407		0.5121	0.008513
946	961	GKLQDVVNQNAQALNT	15	0.5404	0.003908		0.582	0.002296
951	959	VVNQNAQAL	8	0.4777	0.004241		0.469	0.034628
951	961	VVNQNAQALNT	10	0.463	0.003908		0.4739	0.004313
960	970	NTLVKQLSSNF	10	0.435	0.001738		0.4564	0.001633
962	969	LVKQLSSN	7	0.4068	0.003726		0.4013	0.009157
962	970	LVKQLSSNF	8	0.3807	0.004663		0.378	0.001448
962	974	LVKQLSSNFGAIS	12	0.3386	0.003232		0.3315	0.002244
962	977	LVKQLSSNFGAISSVL	15	0.4468	0.004985		0.4447	0.008964
963	970	VKQLSSNF	7	0.446	0.006393		0.4411	0.003035
964	970	KQLSSNF	6	0.4874	0.002491		0.4822	0.009923
970	977	FGAISSVL	7	0.4033	0.00765		0.3822	0.005113
971	977	GAISSVL	6	0.3806	0.007391		0.3768	0.004543
980	990	ILSRLDPPEAE	8	0.2817	0.002449		0.2803	0.004686
980	992	ILSRLDPPEAEVQ	10	0.3573	0.002313		0.3454	0.012596
982	989	SRLDPPEA	5	0.3653	0.005945		0.3538	0.004442
982	990	SRLDPPEAE	6	0.3275	0.002968		0.319	0.006555
982	992	SRLDPPEAEVQ	8	0.4121	0.003418		0.4008	0.015342
990	996	EVQIDRL	6	0.3856	0.01562		0.3736	0.003863
993	1001	IDRLITGRL	8	0.3616	0.004949		0.3985	0.004496
994	1001	DRLITGRL	7	0.3778	0.004185		0.4251	0.019063
997	1006	ITGRLQSLQT	9	0.2026	0.007565		0.3585	0.027444
1018	1024	IRASANL	6	0.1879	0.005785		0.3836	0.007237
1025	1031	AATKMSE	6	0.0752	0.005354		0.1767	0.006773
1032	1042	CVLGQSKRVDF	10	0.216	0.003547		0.2622	0.004639
1032	1046	CVLGQSKRVDFCGKG	14	0.2264	0.003421		0.2243	0.002209
1032	1049	CVLGQSKRVDFCGKGYHL	17	0.1484	0.004094		0.1844	0.005727
1034	1042	LGQSKRVDF	8	0.2221	0.004026		0.2712	0.005252
1034	1049	LGQSKRVDFCGKGYHL	15	0.1515	0.007511		0.1834	0.005779
1035	1042	GQSKRVDF	7	0.2308	0.00378		0.2419	0.003289
1043	1049	CGKGYHL	6	0.0663	0.002582		0.1062	0.007519
1047	1062	YHLMSFPQSAPHGVVF	13	0.0308	0.003825		0.0495	0.001869
1049	1059	LMSFPQSAPHG	8	0.0472	0.001253		0.1481	0.004312
1053	1062	PQSAPHGVVF	7	0.04	0.001113		0.0756	0.005393
1069	1079	PAQEKNFTTAP	8	0.2428	0.018687		0.3294	0.005038
1079	1095	PAICHDGKAHFPREGVF	14	0.0726	0.006135		0.1038	0.007835
1091	1099	REGVFVSNG	8	0.2613	0.004257		0.2963	0.000344
1103	1116	FVTQRNFYEPQIIT	12	0.1713	0.003734		0.2917	0.005171
1103	1117	FVTQRNFYEPQIITT	13	0.1896	0.004299		0.2854	0.005005
1109	1116	FYEPQIIT	6	0.1463	0.005767		0.2427	0.005363
1109	1117	FYEPQIITT	7	0.2012	0.006366		0.2814	0.02488
1110	1117	YEPQIITT	6	0.2339	0.004089		0.3571	0.009501
1118	1127	DNTFVSGNCD	9	0.3292	0.007701		0.3297	0.005785
1121	1127	FVSGNCD	6	0.2299	0.003776		0.2439	0.01303
1136	1145	TVYDPLQPEL	7	0.4157	0.008799		0.3817	0.001367
1148	1169	FKEELDKYFKNHTSPDVDLGDI	20	0.4683	0.003645		0.4887	0.00844
1167	1173	GDISGIN	6	0.3551	0.003988		0.3406	0.004046
1174	1186	ASVVNIQKEIDRL	12	0.5304	0.006274		0.4995	0.004653
1175	1186	SVVNIQKEIDRL	11	0.516	0.004155		0.4956	0.005878
1175	1188	SVVNIQKEIDRLNE	13	0.5483	0.004951		0.529	0.008611
1176	1186	VVNIQKEIDRL	10	0.5128	0.005208		0.4874	0.010867
1177	1188	VNIQKEIDRLNE	11	0.6017	0.010147		0.5804	0.006263
1178	1186	NIQKEIDRL	8	0.5278	0.003048		0.531	0.008008
1179	1188	IQKEIDRLNE	9	0.3323	0.005198		0.3274	0.014307
1187	1197	NEVAKNLNESL	10	0.1211	0.004379		0.1788	0.002139
1201	1213	QELGKYEQVDGSA	12	0.3927	0.002932		0.3788	0.004645
