# Supplementary material for: SARS-CoV-2 S protein:ACE2 interaction reveals novel allosteric targets
Source: eLife. 2021 Feb 8;10:e63646. doi: 10.7554/eLife.63646 (PMC7932696; doi:10.7554/eLife.63646)
Supplement: Figure 3—figure supplement 2—source data 1. [file elife-63646-fig3-figsupp2-data1.xlsx]

## Sheet: Fig.3-supplement 2-source data1
Figure 3-figure supplement 2-source data 1: Relative Fractional deuterium Uptake values at different labeling times for pepsin digest fragments of RBDisolated
					1 min			10 min			100 min
Start	End	Sequence	MaxUptake	MHP	RFU	SD		RFU	SD		RFU	SD
323	330	TESIVRFP	6	948.515	0.281	0.00297068		0.2723	0.00297068		0.3119	0.00664558
324	334	ESIVRFPNITN	9	1289.68	0.1121	0.0134234		0.1777	0.0134234		0.2626	0.00417996
351	361	YAWNRKRISNC	10	1410.71	0.109	0.00164707		0.1557	0.00164707		0.2315	0.00429312
352	361	AWNRKRISNC	9	1247.64	0.0917	0.00478762		0.1516	0.00478762		0.2087	0.00626965
353	361	WNRKRISNC	8	1176.61	0.1143	0.00734562		0.1995	0.00734562		0.2986	0.0175611
365	378	YSVLYNSASFSTFK	13	1613.78	0.0481	0.00280558		0.077	0.00280558		0.1454	0.0105738
369	393	YNSASFSTFKCYGVSPTKLNDLCFT	23	2793.29	0.2511	0.012643		0.2806	0.012643		0.3159	0.00147038
374	387	FSTFKCYGVSPTKL	12	1577.8	0.2092	0.0187422		0.1967	0.0187422		0.1957	0.0146401
375	387	STFKCYGVSPTKL	11	1430.73	0.2603	0.0102266		0.2861	0.0102266		0.3383	0.00585917
377	387	FKCYGVSPTKL	9	1242.66	0.313	0.0256652		0.3288	0.0256652		0.342	0.00221682
378	387	KCYGVSPTKL	8	1095.59	0.2998	0.0537923		0.3097	0.0537923		0.342	0.0114214
384	404	PTKLNDLCFTNVYADSFVIRG	19	2373.19	0.2568	0.00057577		0.3177	0.00057577		0.3426	0.00057577
388	395	NDLCFTNV	7	925.408	0.1886	0.0197142		0.1937	0.0197142		0.2175	0.00361856
392	399	FTNVYADS	7	916.405	0.0507	0.00185361		0.1567	0.00185361		0.2544	0.00186935
393	399	TNVYADS	6	769.336	0.0652	0.00619097		0.1782	0.00619097		0.2949	0.00465984
393	400	TNVYADSF	7	916.405	0.0469	0.00290797		0.1129	0.00290797		0.2015	0.00538142
400	406	FVIRGDE	6	835.431	0.0198	0.0012642		0.0551	0.0012642		0.126	0.00393357
400	407	FVIRGDEV	7	934.499	0.032	0.00109488		0.0945	0.00109488		0.2035	0.00260704
400	420	FVIRGDEVRQIAPGQTGKIAD	19	2270.23	0.1366	0.00161722		0.203	0.00161722		0.3299	0.00565264
400	421	FVIRGDEVRQIAPGQTGKIADY	20	2433.29	0.1043	0.00838494		0.1963	0.00838494		0.3242	0.00674351
401	420	VIRGDEVRQIAPGQTGKIAD	18	2123.16	0.1388	0.0109981		0.2327	0.0109981		0.3506	0.00408493
401	421	VIRGDEVRQIAPGQTGKIADY	19	2286.22	0.1547	0.0123468		0.2112	0.0123468		0.3452	0.00129246
407	420	VRQIAPGQTGKIAD	12	1453.81	0.147	0.0161496		0.2318	0.0161496		0.3321	0.00386853
407	422	VRQIAPGQTGKIADYN	14	1730.92	0.1776	0.0132154		0.2468	0.0132154		0.3457	0.00352225
408	420	RQIAPGQTGKIAD	11	1354.74	0.1284	0.0127957		0.2049	0.0127957		0.3225	0.012476
408	422	RQIAPGQTGKIADYN	13	1631.85	0.1485	0.00938025		0.2274	0.00938025		0.3297	0.00163104
412	420	PGQTGKIAD	7	886.463	0.1906	0.0115627		0.2591	0.0115627		0.367	0.00216663
412	421	PGQTGKIADY	8	1049.53	0.1491	0.00335889		0.2219	0.00335889		0.3479	0.00364115
415	421	TGKIADY	6	767.393	0.1772	0.00465636		0.2509	0.00465636		0.3732	0.0534844
415	422	TGKIADYN	7	881.436	0.1729	0.0152737		0.2379	0.0152737		0.3795	0.00876363
421	428	YNYKLPDD	6	1027.47	0.0493	0.00285693		0.1042	0.00285693		0.2808	0.00827389
421	429	YNYKLPDDF	7	1174.54	0.073	0.007245		0.1145	0.007245		0.2535	0.00830422
421	431	YNYKLPDDFTG	9	1332.61	0.0924	0.00650779		0.1275	0.00650779		0.2608	0.00398356
421	433	YNYKLPDDFTGCV	11	1534.69	0.0744	0.00456409		0.1007	0.00456409		0.1697	0.0459969
423	429	YKLPDDF	5	897.435	0.0996	0.00950138		0.1166	0.00950138		0.2256	0.00461005
423	431	YKLPDDFTG	7	1055.5	0.105	0.010444		0.112	0.010444		0.1906	0.00482803
430	441	TGCVIAWNSNNL	11	1291.61	0.1911	0.00075936		0.1831	0.00075936		0.2192	0.00416874
432	441	CVIAWNSNNL	9	1133.54	0.1869	0.0181137		0.1821	0.0181137		0.2241	0.00244565
432	443	CVIAWNSNNLDS	11	1335.6	0.3149	0.00308392		0.2827	0.00308392		0.2906	0.00308392
433	441	VIAWNSNNL	8	1030.53	0.2095	0.00878673		0.1836	0.00878673		0.223	0.00489965
434	441	IAWNSNNL	7	931.463	0.2258	0.0302137		0.2239	0.0302137		0.2371	0.0024814
442	449	DSKVGGNY	7	839.389	0.3064	0.0249971		0.3161	0.0249971		0.3172	0.00168684
443	452	SKVGGNYNYL	9	1114.55	0.3001	0.0118742		0.3068	0.0118742		0.3145	0.00615604
444	452	KVGGNYNYL	8	1027.52	0.2855	0.0254694		0.3323	0.0254694		0.3377	0.00124229
456	467	FRKSNLKPFERD	10	1536.83	0.0488	0.004306		0.1614	0.004306		0.2193	0.00330414
456	470	FRKSNLKPFERDIST	13	1837.99	0.1522	0.0127915		0.2614	0.0127915		0.3224	0.00720015
460	467	NLKPFERD	6	1018.53	0.4431	0.0280737		0.452	0.0280737		0.4732	0.0103438
471	482	EIYQAGSTPCNG	10	1239.53	0.2907	0.0348136		0.2898	0.0348136		0.2821	0.00105802
471	486	EIYQAGSTPCNGVEGF	14	1671.73	0.3008	0.00164735		0.2555	0.00164735		0.2623	0.00552953
471	487	EIYQAGSTPCNGVEGFN	15	1785.77	0.2635	0.00136193		0.2845	0.00136193		0.2722	0.0136374
472	486	IYQAGSTPCNGVEGF	13	1542.69	0.2607	0.00105401		0.3106	0.00105401		0.3503	0.00153791
472	487	IYQAGSTPCNGVEGFN	14	1656.73	0.2818	0.0014468		0.2827	0.0014468		0.2814	0.00508447
487	494	NCYFPLQS	6	971.429	0.2449	0.0226515		0.3579	0.0226515		0.4242	0.00589179
487	495	NCYFPLQSY	7	1134.49	0.2227	0.0204999		0.3647	0.0204999		0.4147	0.0088801
487	496	NCYFPLQSYG	8	1191.51	0.2343	0.00065053		0.36	0.00065053		0.4094	0.0185449
487	502	NCYFPLQSYGFQPTNG	13	1835.81	0.3432	0.0196651		0.4088	0.0196651		0.4485	0.00631445
488	494	CYFPLQS	5	857.386	0.2204	0.0199185		0.3498	0.0199185		0.431	0.00380758
488	495	CYFPLQSY	6	1020.45	0.1961	0.00128548		0.3546	0.00128548		0.4176	0.00671842
488	502	CYFPLQSYGFQPTNG	12	1721.76	0.2558	0.0210372		0.3382	0.0210372		0.347	0.00358589
490	510	FPLQSYGFQPTNGVGYQPYRV	17	2418.19	0.2464	0.0009027		0.3405	0.0009027		0.379	0.0012588
491	510	PLQSYGFQPTNGVGYQPYRV	16	2271.12	0.2504	0.0233843		0.3209	0.0233843		0.3469	0.00767767
491	512	PLQSYGFQPTNGVGYQPYRVVV	18	2469.26	0.2092	0.00026883		0.2769	0.00026883		0.3033	0.00310655
495	512	YGFQPTNGVGYQPYRVVV	15	2044.03	0.2051	0.00090322		0.213	0.00090322		0.2566	0.0011816
495	513	YGFQPTNGVGYQPYRVVVL	16	2157.11	0.2001	0.00099254		0.2016	0.00099254		0.2435	0.00247328
496	510	GFQPTNGVGYQPYRV	12	1682.83	0.2046	0.00731687		0.2118	0.00731687		0.2451	0.020167
496	512	GFQPTNGVGYQPYRVVV	14	1880.97	0.1916	0.0222265		0.1952	0.0222265		0.2304	0.00200663
503	510	VGYQPYRV	6	981.515	0.162	0.0169469		0.1717	0.0169469		0.2421	0.00688703
503	512	VGYQPYRVVV	8	1179.65	0.113	0.00899484		0.1236	0.00899484		0.1726	0.0150611
503	513	VGYQPYRVVVL	9	1292.74	0.0734	0.011162		0.0802	0.011162		0.1106	0.00399118
514	533	SFELLHAPATVCGPKKSTNL	17	2113.11	0.1852	0.0250689		0.2073	0.0250689		0.2083	0.00481784
515	533	FELLHAPATVCGPKKSTNL	16	2026.08	0.2111	0.0008566		0.2009	0.0008566		0.2037	0.00580725
516	532	ELLHAPATVCGPKKSTN	14	1765.93	0.2115	0.00185594		0.1989	0.00185594		0.206	0.00266156
517	533	LLHAPATVCGPKKSTNL	14	1749.97	0.1718	0.0030298		0.1835	0.0030298		0.1832	0.00430881
518	532	LHAPATVCGPKKSTN	12	1523.8	0.2048	0.0172759		0.2193	0.0172759		0.2014	0.00225297
518	533	LHAPATVCGPKKSTNL	13	1636.88	0.1593	0.00220561		0.1552	0.00220561		0.1608	0.00363989
519	533	HAPATVCGPKKSTNL	12	1523.8	0.2586	0.0231772		0.2514	0.0231772		0.2577	0.00597736
523	533	TVCGPKKSTNL	9	1147.61	0.2227	0.0141069		0.2259	0.0141069		0.246	0.00345894
534	541	VKNKCVNF	7	951.508	0.1994	0.00476533		0.2255	0.00476533		0.2437	0.00596601
542	552	NFNGLTGTGVL	10	1092.57	0.2256	0.0293071		0.2174	0.0293071		0.2242	0.0294677
544	552	NGLTGTGVL	8	831.457	0.2752	0.0274715		0.2715	0.0274715		0.2772	0.00541064
546	552	LTGTGVL	6	660.393	0.3086	0.024766		0.309	0.024766		0.3202	0.00399505
553	565	TESNKKFLPFQQF	11	1613.83	0.2598	0.0345552		0.2706	0.0345552		0.273	0.00936684
553	568	TESNKKFLPFQQFGRD	14	1941.98	0.2246	0.0248215		0.2427	0.0248215		0.2406	0.00209832
555	568	SNKKFLPFQQFGRD	12	1711.89	0.2374	0.0119755		0.23	0.0119755		0.2512	0.012021
567	583	RDIADTTDAVRDPQTLE	15	1915.94	0.1306	0.0175261		0.1858	0.0175261		0.1921	0.00364757
569	575	IADTTDA	6	706.325	0.2158	0.0235619		0.2198	0.0235619		0.2229	0.00107986
569	583	IADTTDAVRDPQTLE	13	1644.81	0.3445	0.0270869		0.3644	0.0270869		0.3705	0.00636053
575	582	AVRDPQTL	6	899.495	0.3546	0.00263246		0.3711	0.00263246		0.3775	0.00458149
575	583	AVRDPQTLE	7	1028.54	0.394	0.00071265		0.4229	0.00071265		0.4451	0.0027907
575	584	AVRDPQTLEI	8	1141.62	0.3313	0.00032097		0.3449	0.00032097		0.3515	0.0289969
576	582	VRDPQTL	5	828.457	0.3964	0.027151		0.3976	0.027151		0.4149	0.0043616
576	583	VRDPQTLE	6	957.5	0.4158	0.0284985		0.4207	0.0284985		0.4347	0.00530451
