# Supplementary material for: SARS-CoV-2 S protein:ACE2 interaction reveals novel allosteric targets
Source: eLife. 2021 Feb 8;10:e63646. doi: 10.7554/eLife.63646 (PMC7932696; doi:10.7554/eLife.63646)
Supplement: Figure 4—source data 1. [file elife-63646-fig4-data1.xlsx]

## Sheet: Figure 4-source data 1
Figure 4-source data 1: Differences in deuterium exchange values between S:ACE2 complex and free S protein at indicated labeling times
				1 min			10 min
Start	End	Sequence	MaxUptake	Difference	SD		Difference	SD
21	31	RTQLPPAYTNS	8	0.067	0.058362		-0.0439	0.132702
32	42	FTRGVYYPDKV	9	0.121	0.062		-0.112	0.078
32	48	FTRGVYYPDKVFRSSVL	15	0.1901	0.113881		-0.2262	0.044974
33	42	TRGVYYPDKV	8	-0.0681	0.048759		0.2284	0.118121
36	48	VYYPDKVFRSSVL	11	-0.182	0.114731		0.135	0.041548
49	55	HSTQDLF	6	0.7486	0.047937		0.8431	0.035854
60	83	SNVTWFHAIHVSGTNGTKRFDNPV	22	-0.0543	0.304027		0.1482	0.151354
85	91	PFNDGVY	5	0.0868	0.034604		0.0042	0.045809
92	103	FASTEKSNIIRG	11	0.0089	0.086951		-0.0024	0.056314
92	106	FASTEKSNIIRGWIF	14	-0.0561	0.084641		-0.212	0.050501
92	110	FASTEKSNIIRGWIFGTTL	18	-0.0343	0.10743		-0.0649	0.08087
93	103	ASTEKSNIIRG	10	0.0126	0.030664		0.0514	0.096994
94	103	STEKSNIIRG	9	-0.0229	0.091671		-0.0616	0.042569
95	103	TEKSNIIRG	8	0.3276	0.034222		-0.0183	0.074559
104	110	WIFGTTL	6	0.0884	0.031984		0.0709	0.033506
107	117	GTTLDSKTQSL	10	-0.1511	0.072268		-0.0052	0.187135
111	117	DSKTQSL	6	-0.0648	0.043051		-0.0833	0.050233
111	118	DSKTQSLL	7	-0.213	0.051878		-0.0769	0.029412
136	143	CNDPFLGV	6	-0.0312	0.058437		-0.1516	0.085209
169	176	EYVSQPFL	6	-0.1977	0.096102		-0.2194	0.079491
170	176	YVSQPFL	5	-0.0751	0.055787		-0.0082	0.025298
177	186	MDLEGKQGNF	9	-0.0443	0.113789		0.024	0.111077
177	191	MDLEGKQGNFKNLRE	14	0.1093	0.223075		0.0484	0.170382
178	191	DLEGKQGNFKNLRE	13	0.077	0.110611		0.0951	0.077182
180	191	EGKQGNFKNLRE	11	0.2579	0.097261		-0.0499	0.052996
181	191	GKQGNFKNLRE	10	-0.2107	0.092919		-0.572	0.142935
184	191	GNFKNLRE	7	0.3366	0.110583		0.231	0.072539
192	199	FVFKNIDG	7	-0.0427	0.046196		-0.0374	0.044695
192	200	FVFKNIDGY	8	-0.084	0.06882		0.0023	0.036748
192	201	FVFKNIDGYF	9	0.0099	0.057851		0.0435	0.024881
193	201	VFKNIDGYF	8	-0.0618	0.082456		0.037	0.134413
194	200	FKNIDGY	6	0.0104	0.031367		0.0796	0.041581
194	201	FKNIDGYF	7	0.0192	0.070588		-0.0006	0.019329
195	201	KNIDGYF	6	-0.0798	0.049797		-0.2289	0.071257
200	212	YFKIYSKHTPINL	11	-0.0823	0.061822		0.0256	0.066506
201	212	FKIYSKHTPINL	10	-0.037	0.052192		0.0027	0.033454
213	220	VRDLPQGF	6	-0.0366	0.072857		0.0409	0.03592
213	223	VRDLPQGFSAL	9	-0.0106	0.130934		0.07	0.057778
213	228	VRDLPQGFSALEPLVD	13	0.0708	0.041921		0.0485	0.101399
221	228	SALEPLVD	6	0.1681	0.043197		-0.0016	0.047827
221	229	SALEPLVDL	7	0.1097	0.031752		0.0102	0.061455
242	264	LALHRSYLTPGDSSSGWTAGAAA	21	0.222	0.12105		-0.0234	0.129742
243	255	ALHRSYLTPGDSS	11	0.0735	0.055912		0.4586	0.021063
243	257	ALHRSYLTPGDSSSG	13	0.0026	0.060574		-0.0693	0.289873
245	257	HRSYLTPGDSSSG	11	-0.5092	0.061717		-0.0165	0.140868
245	264	HRSYLTPGDSSSGWTAGAAA	18	-0.3899	0.192599		0.1743	0.074594
245	265	HRSYLTPGDSSSGWTAGAAAY	19	-0.2396	0.110349		0.1847	0.11959
265	271	YYVGYLQ	6	0.5337	0.098395		0.4946	0.090892
265	276	YYVGYLQPRTFL	10	0.2432	0.041053		-0.0313	0.042679
266	276	YVGYLQPRTFL	9	0.1551	0.064403		0.0359	0.052252
267	276	VGYLQPRTFL	8	0.2055	0.063134		0.0192	0.088535
289	303	VDCALDPLSETKCTL	13	0.2938	0.054024		0.322	0.058031
291	299	CALDPLSET	7	0.0547	0.095411		0.0156	0.08657
291	301	CALDPLSETKC	9	0.3886	0.073128		-0.0874	0.05984
291	303	CALDPLSETKCTL	11	0.2123	0.072522		0.0822	0.0237
294	303	DPLSETKCTL	8	0.2975	0.059654		0.062	0.032841
295	303	PLSETKCTL	7	0.1985	0.106382		0.0254	0.084144
304	313	KSFTVEKGIY	9	-0.0679	0.105693		-0.0528	0.105554
304	317	KSFTVEKGIYQTSN	13	-0.0418	0.101427		0.115	0.059976
304	318	KSFTVEKGIYQTSNF	14	-0.116	0.073973		0.0428	0.059381
306	313	FTVEKGIY	7	0.0079	0.196833		0.0595	0.08981
306	317	FTVEKGIYQTSN	11	-0.0126	0.270293		0.1645	0.168668
306	318	FTVEKGIYQTSNF	12	-0.0027	0.172948		0.2347	0.081973
310	318	KGIYQTSNF	8	0.0414	0.10809		-0.0184	0.069889
318	325	FRVQPTES	6	-0.1259	0.085958		0.0014	0.049693
318	326	FRVQPTESI	7	0.2754	0.155133		0.218	0.20281
324	334	ESIVRFPNITN	9	0.1863	0.232167		0.1162	0.232036
327	338	VRFPNITNLCPF	9	0.1588	0.109054		0.4263	0.05063
337	348	PFGEVFNATRFA	10	0.2011	0.025265		-0.0194	0.053593
340	359	EVFNATRFASVYAWNRKRIS	19	-0.4053	0.059626		-0.6773	0.145788
348	361	ASVYAWNRKRISNC	13	0.0714	0.041372		-0.4043	0.231097
351	361	YAWNRKRISNC	10	-0.0498	0.123792		-0.1618	0.112168
356	375	KRISNCVADYSVLYNSASFS	19	0.0865	0.127819		0.186	0.095918
375	387	STFKCYGVSPTKL	11	-0.173	0.082761		0.0449	0.048467
377	387	FKCYGVSPTKL	9	0.0745	0.158409		0.0164	0.125057
378	387	KCYGVSPTKL	8	-0.2427	0.117322		-0.2016	0.044694
386	407	KLNDLCFTNVYADSFVIRGDEV	21	0.1001	0.136729		-0.0764	0.039775
393	399	TNVYADS	6	0.0971	0.027866		0.0309	0.041849
393	400	TNVYADSF	7	0.0278	0.034902		-0.2759	0.076426
400	406	FVIRGDE	6	-0.1283	0.027269		-0.1933	0.019075
400	416	FVIRGDEVRQIAPGQTG	15	-0.101	0.071866		0.1776	0.184398
400	421	FVIRGDEVRQIAPGQTGKIADY	20	-0.4288	0.101357		-0.692	0.04703
400	422	FVIRGDEVRQIAPGQTGKIADYN	21	-0.1943	0.203717		-0.6049	0.140949
401	420	VIRGDEVRQIAPGQTGKIAD	18	-0.2156	0.080601		-0.6559	0.127774
401	421	VIRGDEVRQIAPGQTGKIADY	19	-0.0655	0.175333		-0.611	0.340697
402	413	IRGDEVRQIAPG	10	-0.2911	0.112487		-0.3364	0.079793
407	420	VRQIAPGQTGKIAD	12	-0.1494	0.117872		-0.4383	0.062576
407	421	VRQIAPGQTGKIADY	13	-0.0422	0.114649		-0.4924	0.065793
407	422	VRQIAPGQTGKIADYN	14	-0.0961	0.116211		-0.5241	0.040705
412	420	PGQTGKIAD	7	-0.1425	0.088899		-0.3083	0.061061
421	429	YNYKLPDDF	7	0.0165	0.042421		-0.2098	0.028637
422	431	NYKLPDDFTG	8	0.0018	0.05219		-0.0806	0.0544
423	429	YKLPDDF	5	-0.0968	0.03333		-0.1484	0.037764
423	431	YKLPDDFTG	7	-0.044	0.026854		-0.0915	0.037701
425	431	LPDDFTG	5	-0.005	0.054108		-0.0742	0.092903
432	441	CVIAWNSNNL	9	-0.1399	0.072955		0.0322	0.030195
433	448	VIAWNSNNLDSKVGGN	15	-0.0963	0.044178		0.0293	0.058696
434	441	IAWNSNNL	7	0.0085	0.118538		-0.0297	0.064645
442	449	DSKVGGNY	7	-0.0955	0.078724		0.022	0.052459
442	452	DSKVGGNYNYL	10	-0.2602	0.142588		0.0305	0.065075
444	452	KVGGNYNYL	8	-0.3541	0.078038		-0.3236	0.071659
453	467	YRLFRKSNLKPFERD	13	-0.4352	0.26117		-0.6291	0.160981
456	467	FRKSNLKPFERD	10	0.0284	0.080786		-0.4109	0.076366
456	469	FRKSNLKPFERDIS	12	-0.0623	0.063532		-0.3924	0.112301
456	470	FRKSNLKPFERDIST	13	-0.1178	0.073208		-0.301	0.077048
456	471	FRKSNLKPFERDISTE	14	-0.0121	0.149081		-0.177	0.143463
471	486	EIYQAGSTPCNGVEGF	14	-0.2268	0.24382		0.1118	0.11576
471	487	EIYQAGSTPCNGVEGFN	15	-0.2829	0.178978		0.0514	0.265106
472	486	IYQAGSTPCNGVEGF	13	-0.1996	0.251391		0.1137	0.166967
472	487	IYQAGSTPCNGVEGFN	14	-0.1111	0.209764		0.1267	0.144387
476	498	GSTPCNGVEGFNCYFPLQSYGFQ	20	-0.9644	0.268771		-0.5294	0.156722
477	500	STPCNGVEGFNCYFPLQSYGFQPT	20	-1.1555	0.073715		-0.8063	0.052638
479	486	PCNGVEGF	6	-0.0955	0.227737		-0.1394	0.122879
487	494	NCYFPLQS	6	-0.1856	0.050843		-0.2721	0.050642
487	495	NCYFPLQSY	7	-0.1839	0.040036		-0.3677	0.088323
488	495	CYFPLQSY	6	-0.2258	0.065365		-0.4274	0.070892
488	496	CYFPLQSYG	7	-0.1906	0.207307		-0.4429	0.081082
488	502	CYFPLQSYGFQPTNG	12	-0.304	0.13589		-0.408	0.079968
490	512	FPLQSYGFQPTNGVGYQPYRVVV	19	-0.7503	0.095766		-0.2358	0.154172
491	510	PLQSYGFQPTNGVGYQPYRV	16	-0.9122	0.148221		-0.4265	0.085015
491	512	PLQSYGFQPTNGVGYQPYRVVV	18	-0.6019	0.103026		-0.2949	0.044968
495	510	YGFQPTNGVGYQPYRV	13	-0.6319	0.062284		-0.3605	0.060334
495	512	YGFQPTNGVGYQPYRVVV	15	-0.6182	0.16287		-0.1909	0.051362
495	513	YGFQPTNGVGYQPYRVVVL	16	-0.5545	0.144046		-0.239	0.091333
496	510	GFQPTNGVGYQPYRV	12	-0.5377	0.164512		-0.1777	0.065282
503	510	VGYQPYRV	6	-0.3522	0.057659		-0.191	0.026457
514	533	SFELLHAPATVCGPKKSTNL	17	-0.094	0.205974		0.0116	0.171276
515	533	FELLHAPATVCGPKKSTNL	16	0.0338	0.194471		0.1542	0.09725
516	533	ELLHAPATVCGPKKSTNL	15	-0.117	0.155081			NaN
517	532	LLHAPATVCGPKKSTN	13	0.274	0.268152		-0.0169	0.246537
517	533	LLHAPATVCGPKKSTNL	14	0.0608	0.272935		0.1691	0.16966
518	533	LHAPATVCGPKKSTNL	13	0.0959	0.27949		0.0547	0.189955
521	533	PATVCGPKKSTNL	10	-0.0406	0.20421		0.0456	0.197428
534	541	VKNKCVNF	7	0.0986	0.013621		-0.1164	0.016244
542	552	NFNGLTGTGVL	10	0.2729	0.120098		0.0994	0.08722
543	555	FNGLTGTGVLTES	12	0.2451	0.177231		0.0095	0.03301
544	552	NGLTGTGVL	8	-0.1012	0.091252		-0.1536	0.071301
546	552	LTGTGVL	6	0.2086	0.050055		-0.0461	0.038724
553	564	TESNKKFLPFQQ	10	-0.1876	0.082785		0.1406	0.049175
553	565	TESNKKFLPFQQF	11	-0.2443	0.165861		0.0871	0.046829
553	568	TESNKKFLPFQQFGRD	14	-0.1781	0.106468		0.0467	0.063829
555	568	SNKKFLPFQQFGRD	12	-0.1625	0.21488		-0.0206	0.131022
569	575	IADTTDA	6	0.2703	0.028726		0.3627	0.043333
569	581	IADTTDAVRDPQT	11	0.1439	0.016088		-0.1416	0.032359
569	582	IADTTDAVRDPQTL	12	0.2086	0.088484		0.0499	0.029676
569	583	IADTTDAVRDPQTLE	13	0.6448	0.183095		0.0945	0.101293
575	582	AVRDPQTL	6	0.2406	0.06024		-0.0098	0.039794
575	583	AVRDPQTLE	7	0.4464	0.09605		0.0723	0.042142
576	582	VRDPQTL	5	-0.0752	0.102076		-0.2847	0.058996
576	583	VRDPQTLE	6	0.2619	0.02935		0.0395	0.043648
584	592	ILDITPCSF	7	0.1103	0.089217		-0.0266	0.033059
584	596	ILDITPCSFGGVS	11	0.0732	0.123379		-0.0735	0.095908
585	592	LDITPCSF	6	-0.0372	0.06812		-0.1016	0.033285
586	592	DITPCSF	5	0.1831	0.055486		0.0444	0.03168
586	596	DITPCSFGGVS	9	0.0134	0.052563		-0.0022	0.030818
599	615	TPGTNTSNQVAVLYQDV	15	-0.2143	0.212955		-0.0192	0.12875
617	632	CTEVPVAIHADQLTPT	13	1.5331	0.068717		1.785	0.116192
621	633	PVAIHADQLTPTW	10	-0.0813	0.133585		0.0974	0.107144
627	633	DQLTPTW	5	-0.0748	0.085556		0.0005	0.032997
627	635	DQLTPTWRV	7	-0.1577	0.136575		0.0722	0.071233
627	643	DQLTPTWRVYSTGSNVF	15	0.1105	0.097154		0.1401	0.144119
634	642	RVYSTGSNV	8	-0.0887	0.105163		-0.0702	0.065833
634	643	RVYSTGSNVF	9	-0.0518	0.134208		0.0437	0.048208
636	642	YSTGSNV	6	-0.1341	0.066561		0.0387	0.095116
636	643	YSTGSNVF	7	-0.0491	0.103171		0.0798	0.095174
642	650	VFQTRAGCL	8	-0.0224	0.12294		-0.0411	0.074398
643	650	FQTRAGCL	7	-0.0513	0.070743		-0.1788	0.04873
644	650	QTRAGCL	6	0.0721	0.110701		-0.0785	0.071205
648	665	GCLIGAEHVNNSYECDIP	16	0.1123	0.111778		0.0729	0.103489
662	671	CDIPIGAGIC	8	0.0058	0.059193		0.0461	0.017732
664	671	IPIGAGIC	6	0.1143	0.092323		0.1119	0.069095
664	673	IPIGAGICAS	8	0.2389	0.037165		0.2036	0.050564
665	671	PIGAGIC	5	0.0489	0.131445		0.0521	0.033486
672	686	ASYQTQTNSPGSASS	13	-0.2703	0.06594		-0.3954	0.07102
672	690	ASYQTQTNSPGSASSVASQ	17	0.2553	0.250888		0.3089	0.121388
672	692	ASYQTQTNSPGSASSVASQSI	19	0.4263	0.252775		0.4342	0.091079
672	694	ASYQTQTNSPGSASSVASQSIIA	21	0.3574	0.190117		0.527	0.121172
673	690	SYQTQTNSPGSASSVASQ	16	0.3364	0.163211		0.224	0.195306
674	690	YQTQTNSPGSASSVASQ	15	0.1191	0.25357		0.1363	0.128839
674	694	YQTQTNSPGSASSVASQSIIA	19	0.105	0.268536		0.6402	0.153871
675	690	QTQTNSPGSASSVASQ	14	-0.1134	0.057184		0.4139	0.078358
675	694	QTQTNSPGSASSVASQSIIA	18	-0.1529	0.051454		0.0923	0.038895
688	695	ASQSIIAY	7	0.1704	0.072699		-0.1059	0.066996
693	699	IAYTMSL	6	-0.2001	0.062559		0.1122	0.103603
695	702	YTMSLGAE	7	-0.1095	0.115937		0.0979	0.062717
696	704	TMSLGAENS	8	-0.0923	0.14283		-0.0276	0.097735
700	706	GAENSVA	6	-0.1274	0.023877		0.0555	0.038781
715	730	PTNFTISVTTEILPVS	13	-0.0852	0.021967		-0.3104	0.077901
724	731	TEILPVSM	6	-0.0713	0.037305		-0.0585	0.032066
725	731	EILPVSM	5	-0.0259	0.02503		-0.0403	0.034129
728	739	PVSMTKTSVDCT	10	0.1228	0.132589		0.2303	0.130516
732	739	TKTSVDCT	7	0.0694	0.056084		0.0032	0.02486
732	741	TKTSVDCTMY	9	0.3057	0.122653		0.0884	0.079089
740	748	MYICGDSTE	8	-0.0284	0.065196		0.0906	0.051471
741	748	YICGDSTE	7	-0.1418	0.063052		-0.1218	0.082684
742	748	ICGDSTE	6	0.0661	0.045896		0.0142	0.043256
753	759	LLQYGSF	6	-0.2216	0.076481		-0.1093	0.049584
763	769	LNRALTG	6	0.0457	0.048678		-0.062	0.033809
764	771	NRALTGIA	7	0.0103	0.031298		-0.0392	0.0284
770	780	IAVEQDKNTQE	10	0.1947	0.070421		-0.1164	0.034576
770	781	IAVEQDKNTQEV	11	0.0805	0.056966		-0.1654	0.06504
770	782	IAVEQDKNTQEVF	12	0.0243	0.018564		-0.1317	0.030735
774	782	QDKNTQEVF	8	0.1572	0.015342		-0.1407	0.015092
781	802	VFAQVKQIYKTPPIKDFGGFNF	19	-0.0712	0.222181		0.1581	0.107156
783	796	AQVKQIYKTPPIKD	11	-0.1525	0.099127		0.0821	0.04495
784	796	QVKQIYKTPPIKD	10	-0.0621	0.199652		0.1038	0.100266
800	815	FNFSQILPDPSKPSKR	12	-0.091	0.085		-0.121	0.062
821	828	LLFNKVTL	7	-0.1883	0.091456		0.0179	0.026853
822	828	LFNKVTL	6	-0.19	0.112116		0.0267	0.06026
822	833	LFNKVTLADAGF	11	-0.6422	0.184913		0.601	0.085787
823	832	FNKVTLADAG	9	-0.341	0.097506		0.0037	0.072936
823	833	FNKVTLADAGF	10	-0.2258	0.096311		0.1747	0.039656
824	833	NKVTLADAGF	9	-0.2148	0.081857		0.1792	0.074269
833	841	FIKQYGDCL	8	-0.0309	0.099025		-0.0576	0.106854
834	840	IKQYGDC	6	0.0277	0.067011		-0.0104	0.08854
834	841	IKQYGDCL	7	-0.2299	0.066398		-0.0602	0.047947
834	848	IKQYGDCLGDIAARD	14	-0.5864	0.119512		0.1335	0.046427
842	848	GDIAARD	6	-0.274	0.093161		-0.0445	0.059033
848	862	DLICAQKFNGLTVLP	13	-0.0722	0.072676		-0.3576	0.047557
852	858	AQKFNGL	6	-0.0033	0.078269		-0.0032	0.038331
858	865	LTVLPPLL	5	-0.2416	0.074027		-0.0007	0.020528
858	866	LTVLPPLLT	6	-0.3533	0.090187		-0.0376	0.036445
859	865	TVLPPLL	4	-0.1512	0.038385		-0.0408	0.030082
859	866	TVLPPLLT	5	-0.2166	0.061616		0.0045	0.048881
870	877	IAQYTSAL	7	-0.031	0.048367		-0.0477	0.050039
877	885	LLAGTITSG	8	-0.0423	0.101425		-0.0023	0.100651
877	886	LLAGTITSGW	9	-0.1846	0.073459		0.0596	0.070063
878	885	LAGTITSG	7	-0.0948	0.102799		-0.1081	0.038247
878	891	LAGTITSGWTFGAG	13	-0.0945	0.120846		-0.0617	0.097268
878	893	LAGTITSGWTFGAGAA	15	-0.056	0.160209		-0.0637	0.166521
886	893	WTFGAGAA	7	0.0207	0.022032		0.1286	0.038963
886	898	WTFGAGAALQIPF	11	0.2268	0.096362		-0.1682	0.063494
889	898	GAGAALQIPF	8	0.0936	0.066145		-0.0876	0.061099
892	899	AALQIPFA	6	-0.4054	0.066371		-0.1688	0.047298
892	901	AALQIPFAMQ	8	-0.3407	0.165346		0.0688	0.062575
892	902	AALQIPFAMQM	9	-0.3729	0.0706		0.0914	0.116292
894	901	LQIPFAMQ	6	0.1151	0.05973		0.1682	0.034761
894	902	LQIPFAMQM	7	-0.2348	0.106072		0.0129	0.054518
902	916	MAYRFNGIGVTQNVL	14	0.2937	0.153909		0.0175	0.069226
903	916	AYRFNGIGVTQNVL	13	0.1351	0.135565		0.2905	0.056235
904	916	YRFNGIGVTQNVL	12	0.1133	0.144569		-0.1511	0.045423
905	916	RFNGIGVTQNVL	11	-0.0812	0.221623		-0.1673	0.081465
907	913	NGIGVTQ	6	0.0962	0.017619		0.0014	0.01034
907	916	NGIGVTQNVL	9	0.1295	0.116494		0.18	0.078094
909	916	IGVTQNVL	7	0.1012	0.094371		0.1369	0.075961
917	924	YENQKLIA	7	-0.0794	0.019784		0.0602	0.068065
923	930	IANQFNSA	7	0.0853	0.028839		-0.1676	0.03124
923	938	IANQFNSAIGKIQDSL	15	-0.016	0.131119		-0.2184	0.179238
923	941	IANQFNSAIGKIQDSLSST	18	-0.5419	0.124189		-0.1348	0.183729
923	945	IANQFNSAIGKIQDSLSSTASAL	22	-0.1461	0.08061		0.2248	0.10093
925	938	NQFNSAIGKIQDSL	13	0.173	0.081594		0.1425	0.126365
927	945	FNSAIGKIQDSLSSTASAL	18	-0.2721	0.093048		0.4169	0.068666
928	936	NSAIGKIQD	8	0.3282	0.169424		-0.0102	0.160148
928	938	NSAIGKIQDSL	10	-0.0375	0.083003		0.1259	0.13355
928	945	NSAIGKIQDSLSSTASAL	17	-0.1677	0.082628		0.3821	0.139763
931	938	IGKIQDSL	7	1.1394	0.041924		1.4922	0.08463
932	943	GKIQDSLSSTAS	11	-0.8413	0.172179		-0.3515	0.090255
937	945	SLSSTASAL	8	-0.2025	0.067247		0.0727	0.049028
939	945	SSTASAL	6	-0.1038	0.108946		0.0597	0.057588
939	956	SSTASALGKLQDVVNQNA	17	-0.3388	0.270081		0.5061	0.130653
939	961	SSTASALGKLQDVVNQNAQALNT	22	-0.5614	0.33692		0.2932	0.245492
946	954	GKLQDVVNQ	8	-0.426	0.102612		-0.5727	0.047357
946	961	GKLQDVVNQNAQALNT	15	-0.3497	0.191934		0.1554	0.094585
951	959	VVNQNAQAL	8	-0.3908	0.099152		-0.0292	0.07523
951	961	VVNQNAQALNT	10	-0.3439	0.170605		-0.0799	0.078128
960	970	NTLVKQLSSNF	10	-0.0751	0.023877		0.4589	0.044119
962	969	LVKQLSSN	7	-0.2451	0.10657		-0.0503	0.03886
962	970	LVKQLSSNF	8	-0.1925	0.131579		0.0451	0.08184
962	974	LVKQLSSNFGAIS	12	-0.2897	0.057949		-0.0867	0.080595
962	977	LVKQLSSNFGAISSVL	15	-0.2772	0.23737		-0.015	0.230281
963	970	VKQLSSNF	7	-0.4857	0.105358		0.0415	0.070359
964	970	KQLSSNF	6	-0.8163	0.026119		0.0704	0.035662
970	977	FGAISSVL	7	-0.324	0.055789		0.0708	0.077537
971	977	GAISSVL	6	-0.2846	0.053595		-0.0539	0.053151
980	990	ILSRLDPPEAE	8	-0.1742	0.019783		0.0113	0.046842
980	992	ILSRLDPPEAEVQ	10	-0.051	0.098622		0.0506	0.077315
982	989	SRLDPPEA	5	-0.3356	0.037294		0.0235	0.070536
982	990	SRLDPPEAE	6	-0.1593	0.063504		-0.0001	0.043087
982	992	SRLDPPEAEVQ	8	-0.2529	0.111499		0.0327	0.06488
990	996	EVQIDRL	6	-0.0909	0.198255		0.0427	0.151231
993	1001	IDRLITGRL	8	-0.1778	0.085031		0.025	0.050724
994	1001	DRLITGRL	7	-0.0608	0.073831		0.0072	0.042007
997	1006	ITGRLQSLQT	9	-0.1624	0.112392		-0.3783	0.173771
1018	1024	IRASANL	6	-0.0645	0.060283		-0.242	0.243647
1025	1031	AATKMSE	6	0.0627	0.04778		-0.1016	0.059757
1032	1042	CVLGQSKRVDF	10	-0.1103	0.105173		-0.0169	0.083416
1032	1046	CVLGQSKRVDFCGKG	14	-0.0013	0.167674		0.0454	0.093546
1032	1049	CVLGQSKRVDFCGKGYHL	17	-0.0392	0.143998		-0.0539	0.038127
1034	1042	LGQSKRVDF	8	-0.163	0.08426		-0.0145	0.068847
1034	1049	LGQSKRVDFCGKGYHL	15	-0.1047	0.170229		0.169	0.0842
1035	1042	GQSKRVDF	7	-0.1047	0.043451		0.2064	0.070584
1043	1049	CGKGYHL	6	0.0331	0.02793		-0.0778	0.021653
1047	1062	YHLMSFPQSAPHGVVF	13	0.054	0.09092		-0.3947	0.201992
1049	1059	LMSFPQSAPHG	8	-0.1235	0.022015		-0.185	0.015844
1053	1062	PQSAPHGVVF	7	-0.0243	0.055915		-0.1614	0.041815
1069	1079	PAQEKNFTTAP	8	-0.0175	0.169775		0.1551	0.231822
1079	1095	PAICHDGKAHFPREGVF	14	0.0595	0.116017		-0.0502	0.110855
1091	1099	REGVFVSNG	8	-0.0217	0.104232		0.0953	0.083644
1103	1116	FVTQRNFYEPQIIT	12	-0.0596	0.104048		-0.1576	0.008957
1103	1117	FVTQRNFYEPQIITT	13	-0.083	0.128571		-0.0249	0.067275
1109	1116	FYEPQIIT	6	0.0731	0.041834		0.0188	0.061225
1109	1117	FYEPQIITT	7	-0.0557	0.047511		-0.0337	0.050687
1110	1117	YEPQIITT	6	-0.0156	0.062092		-0.3296	0.193021
1118	1127	DNTFVSGNCD	9	-0.0975	0.076661		-0.0999	0.135602
1121	1127	FVSGNCD	6	-0.0325	0.057628		-0.0459	0.059028
1136	1145	TVYDPLQPEL	7	-0.3179	0.146524		0.283	0.092447
1148	1169	FKEELDKYFKNHTSPDVDLGDI	20	-0.474	0.274467		0.1066	0.028148
1167	1173	GDISGIN	6	-0.1569	0.07143		0.067	0.064908
1174	1186	ASVVNIQKEIDRL	12	-0.7337	0.119612		0.165	0.107399
1175	1186	SVVNIQKEIDRL	11	-0.5235	0.183541		0.1331	0.083673
1175	1188	SVVNIQKEIDRLNE	13	-0.3767	0.149122		0.0641	0.080614
1176	1186	VVNIQKEIDRL	10	-0.7728	0.245957		0.0121	0.100162
1177	1188	VNIQKEIDRLNE	11	-0.2986	0.176228		0.2276	0.120367
1178	1186	NIQKEIDRL	8	-0.4158	0.19992		-0.028	0.113973
1179	1188	IQKEIDRLNE	9	-0.2485	0.074578		-0.0328	0.118619
1187	1197	NEVAKNLNESL	10	0.1083	0.109305		-0.0883	0.152389
1201	1213	QELGKYEQVDGSA	12	-0.0651	0.052564		0.0306	0.118297
