# Supplementary material for: SARS-CoV-2 S protein:ACE2 interaction reveals novel allosteric targets
Source: eLife. 2021 Feb 8;10:e63646. doi: 10.7554/eLife.63646 (PMC7932696; doi:10.7554/eLife.63646)
Supplement: Figure 5—figure supplement 2—source data 1. [file elife-63646-fig5-figsupp2-data1.xlsx]

## Sheet: Fig.5-supplement 2-source data1
	Figure 5-figure supplement 2-source data 1: Relative Fractional deuterium Uptake values for pepsin digest fragments of ACE2 at indicated labeling times
					1 min		10 min		100 min
Start	End	Sequence	MaxUptake	MHP	RFU	SD	RFU	SD	RFU	SD
21	29	IEEQAKTFL	8	1078.58	0.2355	0.00857759	0.2982	0.0148589	0.3146	0.00826976
28	40	FLDKFNHEAEDLF	12	1624.76	0.1512	0.00192148	0.1664	0.00287933	0.2	0.0109066
30	39	DKFNHEAEDL	9	1217.54	0.1203	0.00739764	0.139	0.00816788	0.1553	0.0126738
30	40	DKFNHEAEDLF	10	1364.61	0.1451	0.00755815	0.1646	0.0109215	0.2002	0.0207873
58	71	NVQNMNNAGDKWSA	13	1548.69	0.2474	0.00664532	0.2812	0.0145254	0.2811	0.00715217
58	73	NVQNMNNAGDKWSAFL	15	1808.84	0.2255	0.00375402	0.2704	0.01189	0.2856	0.00155473
63	72	NNAGDKWSAF	9	1109.5	0.1767	0.00807973	0.2468	0.00859019	0.271	0.0039248
66	72	GDKWSAF	6	810.378	0.2084	0.00476876	0.2428	0.00912356	0.2491	0.00449394
72	79	FLKEQSTL	7	965.53	0.1468	0.00592689	0.2177	0.0147023	0.231	0.00590125
73	79	LKEQSTL	6	818.462	0.188	0.0100016	0.2525	0.0163369	0.2846	0.0175774
75	92	EQSTLAQMYPLQEIQNLT	16	2107.04	0.3833	0.0108188	0.436	0.00510833	0.4866	0.00794801
80	86	AQMYPLQ	5	850.413	0.301	0.00240966	0.3272	0.00889722	0.3597	0.00162154
80	87	AQMYPLQE	6	979.455	0.282	0.0090705	0.3081	0.0129286	0.324	0.00794633
109	120	SEDKSKRLNTIL	11	1403.79	0.1465	0.00889685	0.1699	0.0121041	0.1984	0.0237312
112	124	KSKRLNTILNTMS	12	1505.85	0.1027	0.0118002	0.1153	0.0134277	0.1137	0.0128218
122	146	TMSTIYSTGKVCNPDNPQECLLLEP	21	2753.28	0.1898	0	0.2113	0.0158434	0.2298	0.0112695
126	140	IYSTGKVCNPDNPQE	12	1664.76	0.2146	0.0126331	0.21	0.0194919	0.2363	0.0101452
126	141	IYSTGKVCNPDNPQEC	13	1767.77	0.2893	0.00368511	0.3249	0.00374129	0.3482	0.0112183
142	148	LLLEPGL	5	754.471	0.1624	0.0113056	0.2249	0.0181355	0.2727	0.0162993
143	149	LLEPGLN	5	755.43	0.1583	0.0146624	0.2092	0.0209272	0.2556	0.0158865
143	150	LLEPGLNE	6	884.472	0.1555	0.00994483	0.2004	0.0191663	0.2368	0.0152844
149	156	NEIMANSL	7	891.424	0.2139	0.0108201	0.2481	0.0136011	0.2798	0.0142331
150	156	EIMANSL	6	777.381	0.1853	0.00870484	0.2063	0.0168308	0.198	0.00682272
153	162	ANSLDYNERL	9	1194.57	0.1968	0.0145225	0.1994	0.0151022	0.1905	0.00927231
154	166	NSLDYNERLWAWE	12	1695.78	0.2428	0.00527527	0.2818	0.0156952	0.2938	0.00519137
155	165	SLDYNERLWAW	10	1452.69	0.0802	0.00462244	0.1101	0.01794	0.1405	0.00889715
168	182	WRSEVGKQLRPLYEE	13	1889.99	0.1287	0.0145589	0.1643	0.0124655	0.2138	0.012607
168	183	WRSEVGKQLRPLYEEY	14	2053.05	0.142	0.0113654	0.1805	0.0127411	0.2126	0.0151995
169	180	RSEVGKQLRPLY	10	1445.82	0.1316	0.0107669	0.1691	0.00999858	0.1969	0.016245
169	182	RSEVGKQLRPLYEE	12	1703.91	0.1438	0.012751	0.1668	0.013574	0.1912	0.0156393
184	191	VVLKNEMA	7	903.497	0.1144	0.00206149	0.1193	0.00222735	0.121	0.0179087
184	198	VVLKNEMARANHYED	14	1788.87	0.1076	0.00592855	0.1451	0.00852529	0.1719	0.0108387
184	201	VVLKNEMARANHYEDYGD	17	2123.98	0.1157	0.00500849	0.1377	0.0069622	0.1851	0.0229399
184	202	VVLKNEMARANHYEDYGDY	18	2287.04	0.1038	0.00452633	0.1271	0.00702261	0.1532	0.0169875
186	201	LKNEMARANHYEDYGD	15	1925.84	0.0841	0.011926	0.1126	0.0142074	0.1248	0.0011137
187	201	KNEMARANHYEDYGD	14	1812.76	0.0974	0.00294499	0.1269	0.00835319	0.1566	0.0167671
187	202	KNEMARANHYEDYGDY	15	1975.82	0.0944	0.00257663	0.15	0.01	0.1829	0.00257663
191	201	ARANHYEDYGD	10	1310.54	0.0697	0.00195693	0.086	0.00895154	0.1052	0.00287871
202	216	YWRGDYEVNGVDGYD	14	1807.76	0.1619	0.0103579	0.1576	0.0121739	0.1595	0.0100648
203	216	WRGDYEVNGVDGYD	13	1644.69	0.1728	0.00566338	0.1547	0.0133438	0.1561	0.00758174
208	216	EVNGVDGYD	8	967.4	0.1649	0.0125871	0.1583	0.0130974	0.1619	0.0231922
217	224	YSRGQLIE	7	965.505	0.1654	0.00910319	0.2667	0.0141831	0.3033	0.0194711
223	230	IEDVEHTF	7	989.457	0.0613	0.00263088	0.0819	0.0100829	0.0728	0.0192306
223	231	IEDVEHTFE	8	1118.5	0.0701	0.00418741	0.0733	0.00438627	0.0944	0.00893839
224	230	EDVEHTF	6	876.373	0.0789	0.0061901	0.0853	0.0115003	0.0999	0.00882886
224	231	EDVEHTFE	7	1005.42	0.0754	0.00566569	0.0805	0.00615212	0.0982	0.00646775
225	231	DVEHTFE	6	876.373	0.078	0.00620231	0.0892	0.00797577	0.1202	0.0125854
232	238	EIKPLYE	5	891.482	0.1357	0.0117116	0.158	0.0130068	0.1934	0.0122956
232	240	EIKPLYEHL	7	1141.63	0.0815	0.00607041	0.0936	0.00919454	0.1044	0.0105843
232	242	EIKPLYEHLHA	9	1349.72	0.066	0.00278639	0.0743	0.00400704	0.0823	0.0091965
235	242	PLYEHLHA	6	979.5	0.046	0.00247776	0.0477	0.0038613	0.0527	0.00439405
236	242	LYEHLHA	6	882.447	0.0482	0.00052996	0.0606	0.00134415	0.0736	0.0183388
241	248	HAYVRAKL	7	957.563	0.073	0.00755612	0.0885	0.00798307	0.0797	0.0103268
243	251	YVRAKLMNA	8	1065.59	0.1246	0.0355932	0.1437	0.0360605	0.1423	0.0302249
247	255	KLMNAYPSY	7	1086.53	0.1798	0.0109111	0.1863	0.0204906	0.203	0.00590349
249	255	MNAYPSY	5	845.35	0.1906	0.0182946	0.1925	0.0180578	0.1968	0.0141993
249	262	MNAYPSYISPIGCL	11	1528.72	0.1872	0.0149312	0.2701	0.0202614	0.2808	0.0199187
249	266	MNAYPSYISPIGCLPAHL	14	1946.95	0.155	0.00696937	0.2221	0.0170884	0.2126	0.00692116
256	262	ISPIGCL	5	702.385	0.1192	0.0122793	0.2224	0.0185596	0.2388	0.0114884
256	270	ISPIGCLPAHLLGDM	12	1536.79	0.1108	0.00485212	0.1836	0.00977487	0.1822	0.00756435
257	266	SPIGCLPAHL	7	1007.53	0.1031	0.00621549	0.1767	0.00768724	0.1638	0.00515291
258	266	PIGCLPAHL	6	920.502	0.0989	0.00782348	0.17	0.00904754	0.1696	0.0101796
259	266	IGCLPAHL	6	823.449	0.095	0.00520133	0.1273	0.011993	0.1272	0.00953016
260	266	GCLPAHL	5	710.365	0.1024	0.0126678	0.1723	0.0177844	0.1684	0.0163526
263	270	PAHLLGDM	6	853.424	0.0679	0.0229406	0.0847	0.0239835	0.1	0.022992
279	291	YSLTVPFGQKPNI	10	1463.79	0.2858	0.019867	0.3434	0.0318105	0.3387	0.0171089
279	292	YSLTVPFGQKPNID	11	1578.82	0.297	0.0174317	0.3491	0.0263786	0.3478	0.0142506
296	302	AMVDQAW	6	820.366	0.1868	0.00735192	0.255	0.016511	0.2927	0.0332111
297	304	MVDQAWDA	7	935.393	0.1667	0.00805264	0.2026	0.012742	0.2439	0.0118937
298	304	VDQAWDA	6	804.352	0.1693	0.00750049	0.2037	0.0160119	0.2462	0.012076
302	314	WDAQRIFKEAEKF	12	1667.85	0.1997	0.0149819	0.2196	0.0154862	0.227	0.022195
304	314	AQRIFKEAEKF	10	1366.75	0.1494	0.026578	0.1732	0.0273806	0.1832	0.0320226
305	314	QRIFKEAEKF	9	1295.71	0.1418	0.0392653	0.1655	0.0382658	0.1456	0.0363158
318	329	VGLPNMTQGFWE	10	1378.65	0.0798	0.0106084	0.0893	0.0122792	0.1374	0.0110871
342	355	AVCHPTAWDLGKGD	12	1469.68	0.1032	0.0104698	0.1649	0.00889155	0.1764	0.00923813
345	356	HPTAWDLGKGDF	10	1343.64	0.1049	0.0182763	0.1262	0.010744	0.1983	0.00976415
361	369	CTKVTMDDF	8	1059.45	0.0926	0.0166436	0.1159	0.016338	0.1392	0.0201618
363	369	KVTMDDF	6	855.392	0.0671	0.00769443	0.0725	0.00732464	0.0899	0.011353
368	381	DFLTAHHEMGHIQY	13	1698.77	0.0337	0.00508458	0.0528	0.0079123	0.0787	0.00534579
369	384	FLTAHHEMGHIQYDMA	15	1900.85	0.0326	0.0051151	0.0402	0.00461462	0.0426	0.00444348
370	381	LTAHHEMGHIQY	11	1436.67	0.0253	0.00314585	0.0304	0.00457982	0.028	0.00620836
371	381	TAHHEMGHIQY	10	1323.59	0.034	0.00121481	0.0413	0.00228486	0.0395	0.002076
371	384	TAHHEMGHIQYDMA	13	1640.69	0.0418	0.00422086	0.0434	0.00693181	0.0313	0.0028024
385	391	YAAQPFL	5	809.419	0.2173	0.00448923	0.2765	0.012259	0.3011	0.0134325
392	400	LRNGANEGF	8	977.48	0.105	0.00696853	0.1174	0.00898533	0.1359	0.00581007
392	406	LRNGANEGFHEAVGE	14	1599.75	0.0875	0.0091646	0.1095	0.0109335	0.1521	0.0269319
401	410	HEAVGEIMSL	9	1085.53	0.0863	0.00770836	0.1251	0.00808991	0.1761	0.00997035
403	410	AVGEIMSL	7	819.428	0.1152	0.0220738	0.1494	0.0141726	0.1756	0.0182463
404	420	VGEIMSLSAATPKHLKS	15	1768.96	0.1741	0.0132044	0.1972	0.0152036	0.2068	0.00974025
404	421	VGEIMSLSAATPKHLKSI	16	1882.05	0.0796	0.00259125	0.1104	0.0117371	0.1343	0.00349818
409	428	SLSAATPKHLKSIGLLSPDF	17	2082.16	0.0954	0.00552386	0.1272	0.00916216	0.1473	0.0158418
411	422	SAATPKHLKSIG	10	1209.69	0.0974	0.00624994	0.1047	0.012007	0.1203	0.00665018
411	423	SAATPKHLKSIGL	11	1322.78	0.0806	0.0179146	0.095	0.0185456	0.1303	0.0150968
412	425	AATPKHLKSIGLLS	12	1435.86	0.1082	0.00760044	0.1337	0.0155716	0.164	0.00537824
421	428	IGLLSPDF	6	861.472	0.1433	0.013835	0.1908	0.0193881	0.2161	0.0144605
437	449	NFLLKQALTIVGT	12	1417.84	0.0785	0.00937334	0.1084	0.0106782	0.1321	0.0145048
439	445	LLKQALT	6	786.508	0.0495	0.00732299	0.0759	0.013188	0.1275	0.00570763
445	453	TIVGTLPFT	7	948.54	0.0611	0.00884185	0.0824	0.00859345	0.0681	0.014569
445	455	TIVGTLPFTYM	9	1242.64	0.0657	0.0141802	0.0958	0.0147597	0.0902	0.0165145
446	455	IVGTLPFTYM	8	1141.6	0.0525	0.0109212	0.0733	0.0111472	0.0676	0.0154088
450	462	LPFTYMLEKWRWM	11	1800.9	0.1442	0.0117587	0.2315	0.0104232	0.2675	0.0116633
454	461	YMLEKWRW	7	1211.6	0.0238	0.00966466	0.0304	0.0126602	0.029	0.0155909
456	476	LEKWRWMVFKGEIPKDQWMKK	19	2763.46	0.0812	0.00828697	0.1399	0.00668436	0.1705	0.0265697
465	473	KGEIPKDQW	7	1100.57	0.1473	0.0126856	0.1665	0.0112041	0.2121	0.0112914
465	480	KGEIPKDQWMKKWWEM	14	2120.05	0.1112	0.0112173	0.1336	0.00958855	0.128	0.0323133
474	486	MKKWWEMKREIVG	12	1720.9	0.0712	0.00580236	0.0795	0.0116654	0.0682	0.0057702
475	484	KKWWEMKREI	9	1433.77	0.1492	0.00373222	0.1745	0.0063755	0.1808	0.011473
480	486	MKREIVG	6	832.471	0.0732	0.00261672	0.0742	0.00385405	0.061	0.00897375
487	503	VVEPVPHDETYCDPASL	13	1870.85	0.0699	0.0134601	0.0744	0.0141288	0.0672	0.0135445
489	496	EPVPHDET	5	923.41	0.0663	0.0038423	0.0867	0.00416644	0.079	0.00507969
490	496	PVPHDET	4	794.368	0.0773	0.00791861	0.0983	0.00996484	0.0848	0.00886771
497	503	YCDPASL	5	768.323	0.0699	0.00694828	0.0729	0.00827266	0.0587	0.0152103
513	519	IRYYTRT	6	972.526	0.0251	0.00789642	0.0519	0.00961945	0.071	0.007657
516	522	YTRTLYQ	6	944.484	0.0362	0.006661	0.0551	0.00688197	0.0594	0.0117039
516	523	YTRTLYQF	7	1091.55	0.0446	0.00725586	0.0633	0.00693363	0.063	0.00986001
516	524	YTRTLYQFQ	8	1219.61	0.0428	0.00704038	0.0583	0.0053372	0.0577	0.00741159
516	528	YTRTLYQFQFQEA	12	1694.82	0.1146	0.0073327	0.1471	0.00562818	0.1985	0.0145511
523	529	FQFQEAL	6	882.436	0.0695	0.00060409	0.0834	0.00595776	0.077	0.00667801
524	530	QFQEALC	6	838.376	0.0668	0.00842469	0.0705	0.0087811	0.0634	0.0109372
525	531	FQEALCQ	6	838.376	0.0679	0.0100095	0.089	0.00548092	0.1019	0.00762031
558	568	LRLGKSEPWTL	9	1299.74	0.1121	0.00820962	0.1289	0.0113524	0.1418	0.0164354
558	569	LRLGKSEPWTLA	10	1370.78	0.1273	0.0156536	0.1368	0.0172615	0.1487	0.0182657
559	568	RLGKSEPWTL	8	1186.66	0.2277	0.00490318	0.2335	0.00981098	0.2569	0.0102512
561	570	GKSEPWTLAL	8	1101.59	0.1505	0.0111754	0.1681	0.0137675	0.1563	0.0141649
571	579	ENVVGAKNM	8	961.477	0.2421	0.0146652	0.2637	0.0174981	0.3078	0.0210932
572	585	NVVGAKNMNVRPLL	12	1524.87	0.2115	0.0149418	0.2122	0.0117065	0.2349	0.0334289
573	585	VVGAKNMNVRPLL	11	1410.83	0.2156	0.0104569	0.2293	0.0192369	0.2324	0.0056987
574	585	VGAKNMNVRPLL	10	1311.76	0.2022	0.020832	0.2168	0.0234541	0.2116	0.0194668
575	585	GAKNMNVRPLL	9	1212.69	0.2112	0.0158029	0.2295	0.0201237	0.2257	0.0140274
575	586	GAKNMNVRPLLN	10	1326.73	0.2126	0.0172307	0.2314	0.0201822	0.2396	0.010857
586	592	NYFEPLF	5	929.44	0.1024	0.0127914	0.127	0.0135615	0.1205	0.0195758
586	593	NYFEPLFT	6	1030.49	0.1549	0.0175377	0.1904	0.0178773	0.2028	0.021404
587	593	YFEPLFT	5	916.445	0.1423	0.023286	0.1739	0.0243083	0.1872	0.0257573
593	603	TWLKDQNKNSF	10	1380.69	0.1097	0.00887566	0.1166	0.00513757	0.1194	0.00513757
594	603	WLKDQNKNSF	9	1279.64	0.0892	0.0057808	0.097	0.00975903	0.1062	0.0287656
595	603	LKDQNKNSF	8	1093.56	0.1062	0.00790512	0.0908	0.0103275	0.0861	0.00425939
596	603	KDQNKNSF	7	980.48	0.1218	0.00976275	0.1228	0.0124512	0.1269	0.0121929
597	603	DQNKNSF	6	852.385	0.1101	0.00748774	0.113	0.0074145	0.1177	0.00675987
