# Supplementary material for: SARS-CoV-2 S protein:ACE2 interaction reveals novel allosteric targets
Source: eLife. 2021 Feb 8;10:e63646. doi: 10.7554/eLife.63646 (PMC7932696; doi:10.7554/eLife.63646)
Supplement: Figure 5—figure supplement 2—source data 2. [file elife-63646-fig5-figsupp2-data2.xlsx]

## Sheet: Fig.5-supplement 2-source data2
Figure 5-figure supplement 2-source data 2: Differences in deuterium exchange between S:ACE2 and RBDisolated:ACE2 complexes for peptides of ACE2 at indicated labeling times
					S:ACE2 minus RBD(isolated):ACE2
					1 min		10 min
Start	End	Sequence	MaxUptake	MHP	Difference	SD	Difference	SD
21	29	IEEQAKTFL	8	1078.58	0.3588	0.174996	0.4243	0.138779
28	40	FLDKFNHEAEDLF	12	1624.76	0.4365	0.128047	0.7553	0.126337
30	39	DKFNHEAEDL	9	1217.54	0.3967	0.127566	0.4986	0.019879
30	40	DKFNHEAEDLF	10	1364.61	0.3032	0.082407	0.482	0.072451
58	71	NVQNMNNAGDKWSA	13	1548.69	1.063	0.297204	1.3951	0.105578
58	73	NVQNMNNAGDKWSAFL	15	1808.84	1.3749	0.371207	1.6907	0.105744
63	72	NNAGDKWSAF	9	1109.5		NaN		NaN
66	72	GDKWSAF	6	810.378	0.8001	0.057717	0.5149	0.071709
72	79	FLKEQSTL	7	965.53	0.1978	0.147572	0.4073	0.039515
73	79	LKEQSTL	6	818.462	0.2541	0.135735	0.3484	0.032452
75	92	EQSTLAQMYPLQEIQNLT	16	2107.04	0.2862	0.458299	0.3979	0.150016
80	86	AQMYPLQ	5	850.413	1.2742	0.149938	1.8717	0.038232
80	87	AQMYPLQE	6	979.455	0.2242	0.186672	0.3374	0.024851
109	120	SEDKSKRLNTIL	11	1403.79	0.3825	0.088723	0.7116	0.114319
112	124	KSKRLNTILNTMS	12	1505.85	1.0662	0.2626	0.7393	0.24483
122	146	TMSTIYSTGKVCNPDNPQECLLLEP	21	2753.28
126	140	IYSTGKVCNPDNPQE	12	1664.76	1.20563	0.1109	0.984778	0.148739
126	141	IYSTGKVCNPDNPQEC	13	1767.77	0.909793	0.291567	1.03751	0.178824
142	148	LLLEPGL	5	754.471	0.3478	0.14514	0.4275	0.099531
143	149	LLEPGLN	5	755.43	0.3293	0.126378	0.3701	0.043258
143	150	LLEPGLNE	6	884.472	0.3659	0.145955	0.4412	0.026484
149	156	NEIMANSL	7	891.424	0.6459	0.263434	0.6038	0.069289
150	156	EIMANSL	6	777.381	0.1041	0.046728	0.4463	0.094007
153	162	ANSLDYNERL	9	1194.57	0.639	0.153837	0.5092	0.177645
154	166	NSLDYNERLWAWE	12	1695.78	1.1701	0.543986	1.438	0.216737
155	165	SLDYNERLWAW	10	1452.69	0.6526	0.112592	0.9441	0.12501
168	182	WRSEVGKQLRPLYEE	13	1889.99	0.9947	0.030061	0.8571	0.293995
168	183	WRSEVGKQLRPLYEEY	14	2053.05	0.7385	0.044338	0.7407	0.10155
169	180	RSEVGKQLRPLY	10	1445.82	0.4836	0.240835	0.7148	0.102865
169	182	RSEVGKQLRPLYEE	12	1703.91	0.6836	0.109573	0.7676	0.092691
184	191	VVLKNEMA	7	903.497	0.7878	0.064976	0.617	0.112919
184	198	VVLKNEMARANHYED	14	1788.87	1.0712	0.086039	1.0199	0.031074
184	201	VVLKNEMARANHYEDYGD	17	2123.98	0.4739	0.149789	0.797	0.160998
184	202	VVLKNEMARANHYEDYGDY	18	2287.04	0.4678	0.106323	0.8098	0.170874
186	201	LKNEMARANHYEDYGD	15	1925.84		NaN		NaN
187	201	KNEMARANHYEDYGD	14	1812.76	0.681	0.035423	0.8569	0.158972
187	202	KNEMARANHYEDYGDY	15	1975.82	0.6664	0.13637	0.8056	0.062413
191	201	ARANHYEDYGD	10	1310.54	0.3103	0.061988	0.4235	0.057968
202	216	YWRGDYEVNGVDGYD	14	1807.76	0.69	0.2649	0.8487	0.163563
203	216	WRGDYEVNGVDGYD	13	1644.69	0.6287	0.198796	0.9102	0.159695
208	216	EVNGVDGYD	8	967.4	0.4919	0.212506	0.5962	0.058461
217	224	YSRGQLIE	7	965.505	0.3807	0.12455	0.4122	0.041302
223	230	IEDVEHTF	7	989.457	0.1825	0.107936	0.0465	0.172629
223	231	IEDVEHTFE	8	1118.5	0.22	0.033653	0.2181	0.035459
224	230	EDVEHTF	6	876.373	0.0897	0.061528	0.1949	0.066324
224	231	EDVEHTFE	7	1005.42	0.2532	0.038903	0.2799	0.029879
225	231	DVEHTFE	6	876.373	0.2337	0.084374	0.3532	0.046993
232	238	EIKPLYE	5	891.482	0.3077	0.027654	0.2017	0.045207
232	240	EIKPLYEHL	7	1141.63	0.2732	0.069053	0.2456	0.030389
232	242	EIKPLYEHLHA	9	1349.72	0.1854	0.074036	0.2566	0.021759
235	242	PLYEHLHA	6	979.5	0.1158	0.004922	0.1735	0.014385
236	242	LYEHLHA	6	882.447	0.5436	0.042824	0.3751	0.029163
241	248	HAYVRAKL	7	957.563	0.2256	0.118701	0.3258	0.072861
243	251	YVRAKLMNA	8	1065.59	0.4495	0.298003	0.6586	0.243266
247	255	KLMNAYPSY	7	1086.53	0.6585	0.05536	0.62	0.119124
249	255	MNAYPSY	5	845.35	0.368	0.181702	0.4632	0.083145
249	262	MNAYPSYISPIGCL	11	1528.72	0.7834	0.273112	0.9602	0.162982
249	266	MNAYPSYISPIGCLPAHL	14	1946.95	0.9711	0.008789	1.0494	0.178031
256	262	ISPIGCL	5	702.385	0.3529	0.041109	0.435	0.037514
256	270	ISPIGCLPAHLLGDM	12	1536.79	0.378	0.107003	0.4542	0.106413
257	266	SPIGCLPAHL	7	1007.53	0.2852	0.039655	0.3683	0.105546
258	266	PIGCLPAHL	6	920.502	0.2313	0.034955	0.3611	0.056318
259	266	IGCLPAHL	6	823.449	0.3832	0.04567	0.5416	0.053998
260	266	GCLPAHL	5	710.365	0.2544	0.026876	0.4134	0.05828
263	270	PAHLLGDM	6	853.424	0.2222	0.009722	0.4544	0.030852
279	291	YSLTVPFGQKPNI	10	1463.79	1.3184	0.145516	1.0751	0.159814
279	292	YSLTVPFGQKPNID	11	1578.82	0.5604	0.25478	1.3015	0.242889
296	302	AMVDQAW	6	820.366	-0.8091	0.090103	-0.3694	0.088714
297	304	MVDQAWDA	7	935.393	0.2754	0.194663	0.3585	0.105689
298	304	VDQAWDA	6	804.352	0.2847	0.178148	0.3826	0.097747
302	314	WDAQRIFKEAEKF	12	1667.85	0.9206	0.17079	0.949	0.078214
304	314	AQRIFKEAEKF	10	1366.75	0.2652	0.600383	0.1521	0.645365
305	314	QRIFKEAEKF	9	1295.71	0.6536	0.357545	0.7093	0.347182
318	329	VGLPNMTQGFWE	10	1378.65	-1.1455	0.244132	-0.7806	0.268504
342	355	AVCHPTAWDLGKGD	12	1469.68	0.4086	0.112014	0.6547	0.091805
345	356	HPTAWDLGKGDF	10	1343.64	0.9089	0.15306	0.943	0.112276
361	369	CTKVTMDDF	8	1059.45	0.5844	0.192037	0.5842	0.038712
363	369	KVTMDDF	6	855.392		NaN		NaN
368	381	DFLTAHHEMGHIQY	13	1698.77	0.1944	0.030492	0.479	0.125312
369	384	FLTAHHEMGHIQYDMA	15	1900.85		0.330924		0.046804
370	381	LTAHHEMGHIQY	11	1436.67	0.1585	NaN	-0.1611	NaN
371	381	TAHHEMGHIQY	10	1323.59	0.5835	0.388896	0.1459	0.543381
371	384	TAHHEMGHIQYDMA	13	1640.69	0.2946	NaN	0.2463	NaN
385	391	YAAQPFL	5	809.419	0.267	0.164547	0.4052	0.054164
392	400	LRNGANEGF	8	977.48	0.4664	0.131467	0.5412	0.059672
392	406	LRNGANEGFHEAVGE	14	1599.75		NaN	1.1559	0.141994
401	410	HEAVGEIMSL	9	1085.53		NaN		NaN
403	410	AVGEIMSL	7	819.428	0.3207	0.153824	0.5009	0.094461
404	420	VGEIMSLSAATPKHLKS	15	1768.96	0.8559	0.411897	1.1533	0.187404
404	421	VGEIMSLSAATPKHLKSI	16	1882.05	0.8368	0.078748	0.6644	0.150387
409	428	SLSAATPKHLKSIGLLSPDF	17	2082.16	1.2864	0.1433	0.9091	0.291066
411	422	SAATPKHLKSIG	10	1209.69	0.4281	0.114945	0.479	0.154311
411	423	SAATPKHLKSIGL	11	1322.78	0.5879	0.211275	0.9894	0.211823
412	425	AATPKHLKSIGLLS	12	1435.86	0.4478	0.195125	0.7657	0.169181
421	428	IGLLSPDF	6	861.472	0.3958	0.136728	0.4852	0.093756
437	449	NFLLKQALTIVGT	12	1417.84	1.0117	0.029015	0.8436	0.032854
439	445	LLKQALT	6	786.508	0.2502	0.320308	0.2558	0.452463
445	453	TIVGTLPFT	7	948.54	1.2807	0.09674	1.2591	0.024658
445	455	TIVGTLPFTYM	9	1242.64	0.5577	0.045902	0.6143	0.052645
446	455	IVGTLPFTYM	8	1141.6	0.3602	0.078324	0.4371	0.078806
450	462	LPFTYMLEKWRWM	11	1800.9	0.3828	0.056203	1.0344	0.037418
454	461	YMLEKWRW	7	1211.6	0.0893	0.032072	0.1702	0.040243
456	476	LEKWRWMVFKGEIPKDQWMKK	19	2763.46	0.6965	0.491421	1.0283	0.479385
465	473	KGEIPKDQW	7	1100.57	0.3379	0.027299	0.5221	0.066673
465	480	KGEIPKDQWMKKWWEM	14	2120.05		NaN		NaN
474	486	MKKWWEMKREIVG	12	1720.9	0.3461	0.644557	0.5057	0.289845
475	484	KKWWEMKREI	9	1433.77	0.1463	0.127505	0.1715	0.098849
480	486	MKREIVG	6	832.471	0.0232	0.034196	0.0084	0.070358
487	503	VVEPVPHDETYCDPASL	13	1870.85	0.7368	0.01886	0.4027	0.029392
489	496	EPVPHDET	5	923.41	0.19	0	0.2506	0.237725
490	496	PVPHDET	4	794.368	0.0184	0.015136	0.1812	0.026828
497	503	YCDPASL	5	768.323	0.1813	0.175719	0.1777	0.004749
513	519	IRYYTRT	6	972.526	0.0978	0.097244	-0.0357	0.054567
516	522	YTRTLYQ	6	944.484		NaN		NaN
516	523	YTRTLYQF	7	1091.55	0.1533	0.02119	0.1783	0.019269
516	524	YTRTLYQFQ	8	1219.61	0.1528	0.038417	0.1957	0.086006
516	528	YTRTLYQFQFQEA	12	1694.82		NaN		NaN
523	529	FQFQEAL	6	882.436	0.4178	0.08765	0.3282	0.074495
524	530	QFQEALC	6	838.376	0.2779	0.041959	0.2093	0.146722
525	531	FQEALCQ	6	838.376	0.277	0.092594	0.3157	0.037731
558	568	LRLGKSEPWTL	9	1299.74	0.5316	0.147371	0.5518	0.066998
558	569	LRLGKSEPWTLA	10	1370.78	0.197	0.173645	0.0697	0.061859
559	568	RLGKSEPWTL	8	1186.66	-0.0933	0.098609	-0.0981	0.101796
561	570	GKSEPWTLAL	8	1101.59	0.5768	0.255247	0.5698	0.148477
571	579	ENVVGAKNM	8	961.477	0.1361	0.199799	0.4734	0.071548
572	585	NVVGAKNMNVRPLL	12	1524.87	0.8042	0	1.375	0.181774
573	585	VVGAKNMNVRPLL	11	1410.83	0.7985	0.256046	1.2129	0.089139
574	585	VGAKNMNVRPLL	10	1311.76	1.1127	0.309625	1.2053	0.138539
575	585	GAKNMNVRPLL	9	1212.69	0.7254	0.230238	0.8568	0.219766
575	586	GAKNMNVRPLLN	10	1326.73	0.828	0.082628	1.1071	0.11218
586	592	NYFEPLF	5	929.44	0.3354	0.259656	0.3281	0.020377
586	593	NYFEPLFT	6	1030.49	0.4215	0.088994	0.4871	0.065545
587	593	YFEPLFT	5	916.445	0.4828	0.011717	0.4446	0.019542
593	603	TWLKDQNKNSF	10	1380.69	0.5326	0.080401	0.8143	0.093575
594	603	WLKDQNKNSF	9	1279.64	0.222	0	0.5496	0.080365
595	603	LKDQNKNSF	8	1093.56	0.2166	0.242246	0.6384	0.08909
596	603	KDQNKNSF	7	980.48	0.5071	0.108736	0.562	0.082924
597	603	DQNKNSF	6	852.385	0.2519	0.18744	0.367	0.098155
