# Supplementary material for: SARS-CoV-2 S protein:ACE2 interaction reveals novel allosteric targets
Source: eLife. 2021 Feb 8;10:e63646. doi: 10.7554/eLife.63646 (PMC7932696; doi:10.7554/eLife.63646)
Supplement: Figure 5—source data 1. [file elife-63646-fig5-data1.xlsx]

## Sheet: Fig.5-source data1
Figure 5-source data 1: Differences in deuterium exchange between S:ACE2 and RBDisolated:ACE2 complexes with free ACE2 at indicated labeling times
					RBD(isolated):ACE2 minus ACE2							S:ACE2 minus ACE2
					1 min		10 min		100 min			1 min		10 min
Start	End	Sequence	MaxUptake	MHP	Difference	SD	Difference	SD	Difference	SD		Difference	SD	Difference	SD
21	29	IEEQAKTFL	8	1078.58	-0.8876	0.143235	-1.0121	0.136163	-0.5792	0.109953		-0.5288	0.139732	-0.5878	0.170235
28	40	FLDKFNHEAEDLF	12	1624.76	-0.7704	0.130106	-0.5228	0.04994	-0.512	0.136454		-0.3339	0.023059	0.2325	0.125916
30	39	DKFNHEAEDL	9	1217.54	-0.6347	0.134373	-0.4873	0.07354	-0.3662	0.115686		-0.2381	0.084157	0.0113	0.076123
30	40	DKFNHEAEDLF	10	1364.61	-0.7547	0.089651	-0.5525	0.122268	-0.6878	0.212027		-0.4515	0.10089	-0.0705	0.118976
58	71	NVQNMNNAGDKWSA	13	1548.69	-1.3857	0.300739	-1.332	0.200203	-0.8915	0.156787		-0.3227	0.113192	0.063	0.205863
58	73	NVQNMNNAGDKWSAFL	15	1808.84	-1.3203	0.355667	-1.2508	0.18943	-0.7668	0.10242		0.0546	0.132807	0.4399	0.19727
63	72	NNAGDKWSAF	9	1109.5	-0.265	0.072718	-0.7778	0.207576	-0.5208	0.175399
66	72	GDKWSAF	6	810.378	-0.4268	0.062729	-0.3501	0.056203	-0.3128	0.07485		0.3733	0.03215	0.1648	0.089312
72	79	FLKEQSTL	7	965.53	-0.4623	0.127069	-0.6926	0.107503	-0.3233	0.05316		-0.2645	0.095255	-0.2853	0.105773
73	79	LKEQSTL	6	818.462	-0.5045	0.145223	-0.6013	0.098324	-0.3737	0.109294		-0.2503	0.067353	-0.2529	0.102966
75	92	EQSTLAQMYPLQEIQNLT	16	2107.04	-0.6753	0.414967	-0.7374	0.169291	-0.5556	0.109965		-0.3892	0.202023	-0.3395	0.185406
80	86	AQMYPLQ	5	850.413	-2.3001	0.155315	-2.3292	0.026883	-1.9039	0.03974		-1.0258	0.064891	-0.4574	0.045208
80	87	AQMYPLQE	6	979.455	-0.6493	0.184273	-0.7033	0.080516	-0.4521	0.055181		-0.4251	0.082545	-0.3659	0.078546
109	120	SEDKSKRLNTIL	11	1403.79	-0.3064	0.097872	-0.3246	0.167192	-0.1499	0.295975		0.0761	0.132092	0.387	0.143426
112	124	KSKRLNTILNTMS	12	1505.85	-0.8979	0.181298	-0.5029	0.249709	-0.2067	0.220001		0.1683	0.276029	0.2364	0.222518
122	146	TMSTIYSTGKVCNPDNPQECLLLEP	21	2753.28	-1.2305	0.094993	-0.8343	0.351278	-0.5684	0.243235
126	140	IYSTGKVCNPDNPQE	12	1664.76	-1.1619	0.151597	-0.7069	0.2597	-0.513	0.196002		-0.024833	0.187831	0.150495	0.25318
126	141	IYSTGKVCNPDNPQEC	13	1767.77	-3.3646	0.260994	-3.0896	0.151049	-2.6789	0.318619		-0.252083	0.146573	0.330613	0.11787
142	148	LLLEPGL	5	754.471	-0.3157	0.149102	-0.3426	0.124342	-0.1933	0.141139		0.0321	0.072283	0.0849	0.104357
143	149	LLEPGLN	5	755.43	-0.3515	0.143987	-0.3342	0.110861	-0.2533	0.108534		-0.0222	0.077385	0.0359	0.107137
143	150	LLEPGLNE	6	884.472	-0.4298	0.155283	-0.4527	0.117496	-0.3441	0.102777		-0.0639	0.065656	-0.0115	0.115521
149	156	NEIMANSL	7	891.424	-0.5585	0.222982	-0.6169	0.117752	-0.4394	0.114333		0.0874	0.176493	-0.013	0.095208
150	156	EIMANSL	6	777.381	-0.2396	0.052229	-0.3936	0.129681	-0.1868	0.069855		-0.1355	0.070081	0.0527	0.111427
153	162	ANSLDYNERL	9	1194.57	-0.928	0.130702	-0.6045	0.153777	-0.3502	0.1076		-0.2889	0.201863	-0.0953	0.2118
154	166	NSLDYNERLWAWE	12	1695.78	-1.1663	0.423381	-1.2061	0.196293		NaN		0.0038	0.353106	0.232	0.281762
155	165	SLDYNERLWAW	10	1452.69	-0.2302	0.099092	-0.3088	0.190936	-0.0722	0.137583		0.4224	0.084446	0.6352	0.208662
168	182	WRSEVGKQLRPLYEE	13	1889.99	-0.748	0.203825	-0.4672	0.226401	-0.2282	NaN		0.2467	0.20603	0.3899	0.309981
168	183	WRSEVGKQLRPLYEEY	14	2053.05	-0.6115	0.113654	-0.5425	0.139849		0.186463		0.127	0.121996	0.1983	0.152386
169	180	RSEVGKQLRPLY	10	1445.82	-0.3492	0.278555	-0.424	0.156577	-0.1587	0.212588		0.1344	0.13997	0.2908	0.140909
169	182	RSEVGKQLRPLYEE	12	1703.91	-0.7678	0.185061	-0.5473	0.176843	-0.0798	0.218742		-0.0843	0.156791	0.2203	0.174309
184	191	VVLKNEMA	7	903.497	-0.2342	0.064771	-0.2122	0.105076	0.0855	0.125364		0.5536	0.021049	0.4047	0.046861
184	198	VVLKNEMARANHYED	14	1788.87	-0.8145	0.086154	-0.458	0.119354	-0.2159	0.165457		0.2567	0.117295	0.5619	0.123333
184	201	VVLKNEMARANHYEDYGD	17	2123.98	-0.4803	0.170913	-0.3791	0.174652	-0.4516	0.401335		-0.0064	0.08789	0.4179	0.153082
184	202	VVLKNEMARANHYEDYGDY	18	2287.04	-0.4356	0.081474	-0.514	0.17411	-0.2592	0.343257		0.0322	0.13395	0.2957	0.175616
186	201	LKNEMARANHYEDYGD	15	1925.84	0.2289	0.367129	-0.0963	0.233082	0.7228	0.218261			NaN		NaN
187	201	KNEMARANHYEDYGD	14	1812.76	-0.3499	0.04123	-0.317	0.17003	-0.0889	0.28104		0.3312	0.054357	0.5399	0.153993
187	202	KNEMARANHYEDYGDY	15	1975.82	-0.4994	0.130713		NaN	-0.9283	0.147996		0.167	0.067072		NaN
191	201	ARANHYEDYGD	10	1310.54	-0.1557	0.053166	-0.137	0.102163	-0.1326	0.028787		0.1546	0.042212	0.2865	0.094599
202	216	YWRGDYEVNGVDGYD	14	1807.76	-0.5595	0.263626	-0.5227	0.231841	-0.4354	0.215163		0.1305	0.206711	0.326	0.176347
203	216	WRGDYEVNGVDGYD	13	1644.69	-0.7383	0.188837	-0.5267	0.218324	-0.468	0.098563		-0.1096	0.12125	0.3835	0.194988
208	216	EVNGVDGYD	8	967.4	-0.5484	0.228269	-0.4607	0.112134	-0.3842	0.193983		-0.0564	0.115463	0.1355	0.113142
217	224	YSRGQLIE	7	965.505	-0.4429	0.136632	-0.5529	0.10472	-0.3605	0.142819		-0.0622	0.070466	-0.1407	0.102242
223	230	IEDVEHTF	7	989.457	-0.2358	0.023195	-0.1792	0.154145	-0.1319	0.14857		-0.0534	0.108584	-0.1327	0.126504
223	231	IEDVEHTFE	8	1118.5	-0.2075	0.045792	-0.1536	0.046198	-0.0835	0.086001		0.0125	0.035778	0.0644	0.039821
224	230	EDVEHTF	6	876.373	-0.0778	0.071797	-0.1776	0.093953	-0.0962	0.060954		0.0119	0.037279	0.0172	0.071374
224	231	EDVEHTFE	7	1005.42	-0.1852	0.053197	-0.1722	0.051064	-0.0631	0.048347		0.068	0.042771	0.1078	0.044659
225	231	DVEHTFE	6	876.373	-0.1243	0.087409	-0.2165	0.067051	-0.0977	0.08318		0.1093	0.047418	0.1367	0.047881
232	238	EIKPLYE	5	891.482	-0.1768	0.05915	-0.1173	0.078339	0.0144	0.078349		0.1309	0.064219	0.0844	0.066073
232	240	EIKPLYEHL	7	1141.63	-0.2307	0.077919	-0.1691	0.070124	-0.0626	0.08106		0.0426	0.048043	0.0766	0.065506
232	242	EIKPLYEHLHA	9	1349.72	-0.1581	0.07385	-0.1617	0.038796	-0.0595	0.082769		0.0273	0.035852	0.0949	0.039617
235	242	PLYEHLHA	6	979.5	-0.0327	0.014867	-0.027	0.024499	0.0521	0.031059		0.0832	0.01566	0.1465	0.026081
236	242	LYEHLHA	6	882.447	-0.1841	0.00318	-0.1861	0.017227	-0.2285	0.110738		0.3595	0.042942	0.189	0.02615
241	248	HAYVRAKL	7	957.563	-0.1065	0.076662	-0.0188	0.075113	0.1341	0.102581		0.1191	0.117508	0.3071	0.07689
243	251	YVRAKLMNA	8	1065.59	-0.3402	0.376514	-0.3636	0.341512	-0.1129	0.326867		0.1093	0.330458	0.295	0.330142
247	255	KLMNAYPSY	7	1086.53	-0.5504	0.076378	-0.3805	0.16697	-0.2975	0.104093		0.1082	0.094331	0.2396	0.165706
249	255	MNAYPSY	5	845.35	-0.3602	0.197719	-0.3591	0.109059	-0.233	0.105737		0.0077	0.103233	0.1041	0.106411
249	262	MNAYPSYISPIGCL	11	1528.72	-0.6832	0.313054	-0.7802	0.263364	-0.7707	0.226772		0.1002	0.174754	0.18	0.2378
249	266	MNAYPSYISPIGCLPAHL	14	1946.95	-0.9548	0.097571	-1.0206	0.239237	-0.4203	0.131306		0.0163	0.097966	0.0288	0.29821
256	262	ISPIGCL	5	702.385	-0.251	0.071111	-0.3291	0.099631	-0.2534	0.098151		0.1019	0.064594	0.1059	0.093295
256	270	ISPIGCLPAHLLGDM	12	1536.79	-0.2289	0.110366	-0.2877	0.139405	-0.114	0.095561		0.1491	0.077778	0.1665	0.139312
257	266	SPIGCLPAHL	7	1007.53	-0.2034	0.058481	-0.2773	0.080985	-0.1188	0.122202		0.0817	0.044028	0.091	0.101846
258	266	PIGCLPAHL	6	920.502	-0.1534	0.055419	-0.2485	0.06982	-0.1211	0.061337		0.0779	0.050571	0.1127	0.064736
259	266	IGCLPAHL	6	823.449	-0.4798	0.035601	-0.4883	0.086467	-0.2513	0.100656		-0.0966	0.052594	0.0533	0.076126
260	266	GCLPAHL	5	710.365	-0.1452	0.068271	-0.2642	0.103271	-0.1529	0.104134		0.1091	0.063914	0.1492	0.092444
263	270	PAHLLGDM	6	853.424	-0.1323	0.137644	-0.2369	0.143907	-0.1562	0.150622		0.09	0.137987	0.2175	0.147165
279	291	YSLTVPFGQKPNI	10	1463.79	-1.4083	0.19867	-1.0672	0.343371	-0.6968	0.273156		-0.09	0.246261	0.0079	0.33169
279	292	YSLTVPFGQKPNID	11	1578.82	-0.9255	0.282813	-1.4106	0.364326	-0.8967	0.350578		-0.3651	0.241796	-0.1091	0.307657
296	302	AMVDQAW	6	820.366	0.8342	0.084999	0.4238	0.113148	0.5418	0.221527		0.0251	0.069176	0.0544	0.121227
297	304	MVDQAWDA	7	935.393	-0.3375	0.196173	-0.3975	0.112402	-0.3688	0.101664		-0.0621	0.075925	-0.0391	0.120197
298	304	VDQAWDA	6	804.352	-0.347	0.178598	-0.3872	0.11137	-0.2648	0.102243		-0.0622	0.062369	-0.0045	0.124942
302	314	WDAQRIFKEAEKF	12	1667.85	-0.8608	0.213367	-0.7902	0.186811	-0.3534	0.279019		0.0598	0.219744	0.1587	0.200718
304	314	AQRIFKEAEKF	10	1366.75	-0.5191	0.35904	-0.4153	0.330784	-0.0915	0.362304		-0.2538	0.610597	-0.2632	0.67603
305	314	QRIFKEAEKF	9	1295.71	-0.7612	0.446842	-0.8048	0.420022	-0.4292	0.394634		-0.1076	0.421825	-0.0955	0.425828
318	329	VGLPNMTQGFWE	10	1378.65	1.1163	0.106084	1.2881	0.207191	0.8697	0.114818		-0.0292	0.266184	0.5075	0.243561
342	355	AVCHPTAWDLGKGD	12	1469.68	-0.4064	0.168321	-0.4991	0.131591	-0.3423	0.134731		0.0022	0.125638	0.1556	0.117818
345	356	HPTAWDLGKGDF	10	1343.64	-0.6766	0.23839	-0.6351	0.126766	-1.0369	0.097641		0.2323	0.182763	0.3079	0.140081
361	369	CTKVTMDDF	8	1059.45	-0.433	0.142062	-0.4015	0.130705	-0.1337	0.201919		0.1514	0.228371	0.1827	0.136316
363	369	KVTMDDF	6	855.392		NaN		NaN		NaN		-0.0238	0.046236	0.0357	0.065036
368	381	DFLTAHHEMGHIQY	13	1698.77	-0.07	0.0661	-0.2747	0.102869	-0.2723	0.070253		0.1244	0.072794	0.2044	0.162116
369	384	FLTAHHEMGHIQYDMA	15	1900.85	-0.2463	0.053208	-0.2071	0.060502	-0.0552	0.065261			0.334533		0.052812
370	381	LTAHHEMGHIQY	11	1436.67	-0.2372	0.049785	0.0387	0.072992	-0.1902	0.106673		-0.0787	NaN	-0.1224	NaN
371	381	TAHHEMGHIQY	10	1323.59	-0.1259	0.165186	-0.0633	0.532694	0.008	0.154317		0.4576	0.352577	0.0825	0.112976
371	384	TAHHEMGHIQYDMA	13	1640.69	-0.2777	0.064975	-0.0824	0.082705	0.1244	0.097827		0.0168	NaN	0.1638	NaN
385	391	YAAQPFL	5	809.419	-0.6018	0.09893	-0.5649	0.076141	-0.3672	0.092149		-0.3348	0.135264	-0.1597	0.068195
392	400	LRNGANEGF	8	977.48	-0.2972	0.135985	-0.3086	0.077354	-0.2798	0.046563		0.1692	0.070764	0.2326	0.088946
392	406	LRNGANEGFHEAVGE	14	1599.75		NaN	-0.5901	0.160632	-0.5593	0.401928		0.274	0.158531	0.5658	0.203027
401	410	HEAVGEIMSL	9	1085.53	-0.1724	0.117198	-0.2068	0.109793	-0.1957	0.114663			NaN		NaN
403	410	AVGEIMSL	7	819.428	-0.3099	0.202334	-0.3975	0.136681	-0.2276	0.141886		0.0108	0.174567	0.1034	0.099628
404	420	VGEIMSLSAATPKHLKS	15	1768.96	-0.7256	0.425005	-0.8272	0.271474	-0.3756	0.238819		0.1303	0.259789	0.3261	0.25581
404	421	VGEIMSLSAATPKHLKSI	16	1882.05	-0.5863	0.042281	-0.5123	0.240588	-0.2871	0.167949		0.2505	0.088609	0.1521	0.187793
409	428	SLSAATPKHLKSIGLLSPDF	17	2082.16	-1.0965	0.135366	-0.6486	0.100784	-0.2704	0.274184		0.1899	0.097956	0.2605	0.308021
411	422	SAATPKHLKSIG	10	1209.69	-0.3304	0.106249	-0.2779	0.204119	-0.1406	0.241737		0.0977	0.156528	0.2011	0.255884
411	423	SAATPKHLKSIGL	11	1322.78	-0.0692	0.207837	-0.0332	0.217681	-0.4245	0.200948		0.5187	0.256179	0.9563	0.257432
412	425	AATPKHLKSIGLLS	12	1435.86	-0.5852	0.194477	-0.6214	0.195068	-0.3343	0.167667		-0.1374	0.12996	0.1443	0.245772
421	428	IGLLSPDF	6	861.472	-0.3322	0.156026	-0.3873	0.140459	-0.2942	0.140186		0.0636	0.090176	0.0979	0.126989
437	449	NFLLKQALTIVGT	12	1417.84	-0.3539	0.057129	-0.3993	0.066807	-0.2675	0.094905		0.6579	0.062482	0.4443	0.069469
439	445	LLKQALT	6	786.508	-0.2431	0.206242	-0.2702	0.187966	-0.0203	0.140569		0.0071	0.274783	-0.0145	0.468489
445	453	TIVGTLPFT	7	948.54	-0.1868	0.09147	-0.1893	0.060874	0.0732	0.102132		1.0939	0.093024	1.0699	0.064338
445	455	TIVGTLPFTYM	9	1242.64	-0.3944	0.132804	-0.3913	0.134652	-0.0518	0.15069		0.1633	0.130555	0.223	0.141179
446	455	IVGTLPFTYM	8	1141.6	-0.2452	0.105015	-0.2116	0.106063	0.063	0.137911		0.1149	0.10185	0.2254	0.104241
450	462	LPFTYMLEKWRWM	11	1800.9	-0.2332	0.129345	-0.4979	0.116338	-0.326	0.149418		0.1495	0.141029	0.5365	0.118985
454	461	YMLEKWRW	7	1211.6	-0.1087	0.067946	-0.145	0.089994	-0.0599	0.112209		-0.0193	0.074604	0.0253	0.096063
456	476	LEKWRWMVFKGEIPKDQWMKK	19	2763.46	-0.6754	0.485747	-0.7482	0.422624	-0.5055	0.510523		0.0211	0.234792	0.28	0.288892
465	473	KGEIPKDQW	7	1100.57	-0.2653	0.088799	-0.2009	0.094796	-0.105	0.154535		0.0726	0.092901	0.3212	0.088097
465	480	KGEIPKDQWMKKWWEM	14	2120.05	-0.6791	0.210295	-0.3664	0.134258	0.082	0.467528			NaN		NaN
474	486	MKKWWEMKREIVG	12	1720.9	-0.3256	0.052221	-0.2174	0.104989	0.1299	0.144367		0.0205	0.646669	0.2883	0.308273
475	484	KKWWEMKREI	9	1433.77	-0.139	0.045695	0.1521	0.12496	-0.0201	0.142632		0.0073	0.134838	0.3236	0.076567
480	486	MKREIVG	6	832.471	-0.0897	0.0175	0.0014	0.055501	0.1215	0.05823		-0.0665	0.036825	0.0098	0.054215
487	503	VVEPVPHDETYCDPASL	13	1870.85	-0.3698	0.05384	-0.0106	0.05979	0.2087	0.056074		0.367	0.057048	0.3921	0.060637
489	496	EPVPHDET	5	923.41	-0.1895	0.04995	-0.1563	0.238876	-0.0684	0.229746		0.0005	0.04995	0.0943	0.072932
490	496	PVPHDET	4	794.368	-0.1124	0.039596	-0.0968	0.051375	-0.0294	0.057408		-0.094	0.042385	0.0843	0.055184
497	503	YCDPASL	5	768.323	-0.1281	0.178913	-0.1444	0.041363	0.0669	0.081013		0.0531	0.035794	0.0333	0.041635
513	519	IRYYTRT	6	972.526	-0.0613	0.047379	-0.1512	0.064636	0.1354	0.04669		0.0365	0.108172	-0.187	0.073907
516	522	YTRTLYQ	6	944.484		NaN		NaN		NaN		-0.0671	0.045893	-0.0522	0.048137
516	523	YTRTLYQF	7	1091.55	-0.2111	0.051766	-0.2298	0.052165	-0.0398	0.069138		-0.0577	0.054118	-0.0515	0.048595
516	524	YTRTLYQFQ	8	1219.61	-0.1658	0.067716	-0.1762	0.094624	0.0329	0.061732		-0.013	0.056877	0.0195	0.04571
516	528	YTRTLYQFQFQEA	12	1694.82	-0.6259	0.087992	-0.3655	0.249351	-0.5363	0.275264			NaN		NaN
523	529	FQFQEAL	6	882.436	-0.2449	0.071665	-0.2173	0.079857	-0.1151	0.066288		0.1729	0.050724	0.1109	0.04157
524	530	QFQEALC	6	838.376	-0.1473	0.056817	-0.1255	0.153173	-0.0759	0.077743		0.1306	0.060354	0.0838	0.060143
525	531	FQEALCQ	6	838.376	-0.1656	0.076902	-0.2021	0.03568	-0.0795	0.05717		0.1115	0.099365	0.1136	0.048099
558	568	LRLGKSEPWTL	9	1299.74	-0.4216	0.156195	-0.4115	0.111235	-0.3189	0.157773		0.11	0.090774	0.1403	0.113989
558	569	LRLGKSEPWTLA	10	1370.78	-0.2699	0.220972	-0.0403	0.182778	0.4678	0.197898		-0.0729	0.174159	0.0294	0.173235
559	568	RLGKSEPWTL	8	1186.66	-0.5096	0.099831	-0.3614	0.115509	-0.4587	0.087972		-0.6029	0.053242	-0.4595	0.096648
561	570	GKSEPWTLAL	8	1101.59	-0.5598	0.25197	-0.5137	0.145663	-0.2744	0.172934		0.0171	0.132846	0.0562	0.158396
571	579	ENVVGAKNM	8	961.477	-0.6279	0.117321	-0.5899	0.141048	-0.5498	0.180568		-0.4917	0.231698	-0.1165	0.156256
572	585	NVVGAKNMNVRPLL	12	1524.87	-0.5064	0.179302	-0.7806	0.21876	-0.6798	0.436838		0.2979	0.179302	0.5943	0.157015
573	585	VVGAKNMNVRPLL	11	1410.83	-0.8975	0.265127	-1.0405	0.216024	-0.5908	0.189579		-0.099	0.147408	0.1724	0.225462
574	585	VGAKNMNVRPLL	10	1311.76	-0.8233	0.372436	-0.8003	0.256685	-0.4454	0.231752		0.2895	0.209651	0.405	0.251643
575	585	GAKNMNVRPLL	9	1212.69	-0.5717	0.255652	-0.5614	0.185375	-0.2542	0.166723		0.1537	0.167655	0.2954	0.282023
575	586	GAKNMNVRPLLN	10	1326.73	-0.3746	0.172307	-0.6099	0.23069	-0.3797	0.178138		0.4534	0.191095	0.4972	0.202065
586	592	NYFEPLF	5	929.44	-0.2089	0.267415	-0.2033	0.070005	-0.0432	0.098366		0.1265	0.063964	0.1248	0.068631
586	593	NYFEPLFT	6	1030.49	-0.3002	0.13642	-0.3601	0.120662	-0.1377	0.134003		0.1213	0.107027	0.127	0.112908
587	593	YFEPLFT	5	916.445	-0.4288	0.11643	-0.3652	0.123071	-0.1742	0.136164		0.054	0.117018	0.0794	0.121573
593	603	TWLKDQNKNSF	10	1380.69	-0.2079	0.088757	-0.3092	0.078821	-0.0617	0.086003		0.3247	0.119758	0.5052	0.088444
594	603	WLKDQNKNSF	9	1279.64	-0.0676	0.052027	-0.2111	0.099182	-0.1571	0.263036		0.1544	0.052027	0.3386	0.109773
595	603	LKDQNKNSF	8	1093.56	-0.4261	0.237956	-0.2167	0.091199	-0.0339	0.0377		-0.2095	0.100294	0.4217	0.115204
596	603	KDQNKNSF	7	980.48	-0.1865	0.106942	-0.1332	0.098464	-0.0501	0.107947		0.3207	0.098628	0.4288	0.11124
597	603	DQNKNSF	6	852.385	-0.181	0.185426	-0.1999	0.051028	-0.2547	0.060285		0.0709	0.069192	0.167	0.104828
