# Supplementary material for: SARS-CoV-2 S protein:ACE2 interaction reveals novel allosteric targets
Source: eLife. 2021 Feb 8;10:e63646. doi: 10.7554/eLife.63646 (PMC7932696; doi:10.7554/eLife.63646)
Supplement: Supplementary file 1. [file elife-63646-supp1.xlsx]

## Sheet: Table S1
Table S1: Deuterium exchange at indicated labeling times for S and S:ACE2 complex
				Spike (1 min)			Spike (10 min)			Spike:ACE2 (1 min)		Spike:ACE2 (10 min)
Start	End	Sequence	MaxUptake	Uptake	Uptake SD		Uptake	Uptake SD		Uptake	Uptake SD	Uptake	Uptake SD
21	31	RTQLPPAYTNS	8	1.32876	0.034724		1.92104	0.05777		1.39571	0.046908	1.87714	0.119467
32	42	FTRGVYYPDKV	9	1.31908	0.029568		1.79335	0.021301
32	48	FTRGVYYPDKVFRSSVL	15	3.45226	0.033729		3.87576	0.019996		3.38415	0.108771	4.10412	0.040284
33	42	TRGVYYPDKV	8	1.20349	0.04872		1.81378	0.04323		1.39358	0.001947	1.58761	0.109926
36	48	VYYPDKVFRSSVL	11	3.3754	0.039892		3.46639	0.038539		3.19343	0.107572	3.60136	0.015525
49	55	HSTQDLF	6	0.531579	0.01794		0.897969	0.022018		1.2802	0.044453	1.74105	0.028297
60	83	SNVTWFHAIHVSGTNGTKRFDNPV	22	3.88946	0.123618		4.43069	0.102779		3.83519	0.27776	4.57887	0.111107
85	91	PFNDGVY	5	0.288558	0.021833		0.61948	0.042969		0.375392	0.026847	0.623658	0.015879
92	103	FASTEKSNIIRG	11	1.8688	0.028934		2.49791	0.01858		1.87767	0.081996	2.49549	0.053161
92	106	FASTEKSNIIRGWIF	14	1.20359	0.042758		1.79129	0.025672		1.21615	0.073046	1.84267	0.043489
92	110	FASTEKSNIIRGWIFGTTL	18	1.94236	0.04399		3.87874	0.073508		2.26992	0.098011	3.86044	0.033711
93	103	ASTEKSNIIRG	10	1.71912	0.023972		2.54392	0.058599		1.66301	0.019122	2.33196	0.077291
94	103	STEKSNIIRG	9	1.44038	0.015158		2.00927	0.013932		1.40612	0.090409	1.9444	0.040225
95	103	TEKSNIIRG	8	1.41271	0.013523		1.96491	0.022435		1.38978	0.031437	1.90332	0.071104
104	110	WIFGTTL	6	0.703032	0.013745		1.46805	0.032829		0.791397	0.02888	1.53891	0.006699
107	117	GTTLDSKTQSL	10	1.15048	0.036191		2.02166	0.180764		0.999376	0.062553	2.01649	0.048411
111	117	DSKTQSL	6	0.656823	0.025088		0.891729	0.039541		0.59205	0.034985	0.808433	0.030983
111	118	DSKTQSLL	7	0.685211	0.012671		0.703968	0.003815		0.472181	0.050306	0.627091	0.029164
136	143	CNDPFLGV	6	1.82048	0.041007		2.16296	0.05977		1.78929	0.041633	2.01132	0.06073
169	176	EYVSQPFL	6	2.50179	0.058873		2.58875	0.02597		2.30406	0.075957	2.36936	0.075129
170	176	YVSQPFL	5	1.83373	0.020315		1.90496	0.008874		1.75863	0.051957	1.89676	0.023691
177	186	MDLEGKQGNF	9	2.09335	0.08252		2.11329	0.09059		2.0491	0.078348	2.13734	0.064276
177	191	MDLEGKQGNFKNLRE	14	2.81056	0.177315		3.59794	0.108341		2.91987	0.135357	3.64633	0.131501
178	191	DLEGKQGNFKNLRE	13	2.5658	0.077368		3.35892	0.062608		2.64283	0.079051	3.45404	0.045137
180	191	EGKQGNFKNLRE	11	1.70007	0.069265		2.5879	0.044754		1.95798	0.06828	2.53804	0.028384
181	191	GKQGNFKNLRE	10	2.12176	0.054745		2.93811	0.095145		1.91102	0.075079	2.36614	0.106667
184	191	GNFKNLRE	7	1.32507	0.033667		1.95313	0.044311		1.6617	0.105333	2.18409	0.057432
192	199	FVFKNIDG	7	1.23481	0.009159		1.37127	0.03897		1.19211	0.045279	1.3339	0.021886
192	200	FVFKNIDGY	8	1.29151	0.045417		1.73632	0.026828		1.20748	0.051706	1.73863	0.025113
192	201	FVFKNIDGYF	9	1.50767	0.019871		2.11731	0.017689		1.51753	0.054331	2.16084	0.017497
193	201	VFKNIDGYF	8	1.52609	0.057576		1.95894	0.057131		1.46432	0.059025	1.99593	0.121668
194	200	FKNIDGY	6	1.19166	0.021761		1.6007	0.041567		1.20211	0.02259	1.68032	0.001073
194	201	FKNIDGYF	7	1.29747	0.021507		1.83546	0.015023		1.31671	0.067232	1.83483	0.012162
195	201	KNIDGYF	6	1.05046	0.026416		1.63131	0.025718		0.970642	0.042213	1.40236	0.066454
200	212	YFKIYSKHTPINL	11	1.44381	0.047834		1.50561	0.05795		1.36153	0.039165	1.5312	0.03263
201	212	FKIYSKHTPINL	10	1.3745	0.021696		1.51526	0.018193		1.3375	0.047469	1.51797	0.028074
213	220	VRDLPQGF	6	1.79176	0.034762		1.82192	0.022697		1.75513	0.064029	1.86281	0.02784
213	223	VRDLPQGFSAL	9	2.30371	0.07462		2.38594	0.049086		2.29309	0.10759	2.4559	0.030477
213	228	VRDLPQGFSALEPLVD	13	2.25369	0.016093		3.26105	0.099277		2.32451	0.038709	3.30951	0.020638
221	228	SALEPLVD	6	0.327882	0.023486		1.25477	0.044767		0.495936	0.036255	1.25322	0.016833
221	229	SALEPLVDL	7	0.359362	0.02334		1.43583	0.055689		0.469087	0.021527	1.44607	0.025989
242	264	LALHRSYLTPGDSSSGWTAGAAA	21	6.45218	0.115263		6.82974	0.079432		5.94294	0.036982	6.81323	0.102584
243	255	ALHRSYLTPGDSS	11	0.464775	0.043782		0.891658	0.015495		0.686764	0.034775	0.868298	0.014267
243	257	ALHRSYLTPGDSSSG	13	2.19686	0.054737		2.11121	0.054007		2.27035	0.025943	2.56977	0.284798
245	257	HRSYLTPGDSSSG	11	2.12334	0.049833		2.22321	0.042365		2.12595	0.03641	2.15391	0.134346
245	264	HRSYLTPGDSSSGWTAGAAA	18	5.57703	0.09556		5.40042	0.03989		5.18716	0.167221	5.57468	0.063032
245	265	HRSYLTPGDSSSGWTAGAAAY	19	5.46035	0.025336		5.4503	0.045354		5.22071	0.107401	5.63501	0.110656
265	271	YYVGYLQ	6	0.504888	0.024977		0.979927	0.029653		1.03856	0.095172	1.47456	0.085919
265	276	YYVGYLQPRTFL	10	0.960398	0.023162		1.6972	0.023335		1.20361	0.033895	1.66591	0.035734
266	276	YVGYLQPRTFL	9	0.875395	0.042739		1.42288	0.04182		1.03051	0.048178	1.45877	0.031327
267	276	VGYLQPRTFL	8	0.786287	0.034369		1.35523	0.034311		0.991784	0.052959	1.37442	0.081616
289	303	VDCALDPLSETKCTL	13	2.61114	0.077071		4.40906	0.058357		2.90498	0.056244	4.73106	0.063944
291	299	CALDPLSET	7	1.60253	0.043286		2.29943	0.047944		1.65725	0.032326	2.31501	0.032696
291	301	CALDPLSETKC	9	1.76016	0.06848		2.84628	0.014899		2.14874	0.025655	2.75889	0.057956
291	303	CALDPLSETKCTL	11	1.97456	0.04275		3.17544	0.010505		2.18688	0.058582	3.25768	0.021244
294	303	DPLSETKCTL	8	2.01957	0.056113		3.2702	0.025858		2.31706	0.020245	3.33225	0.020245
295	303	PLSETKCTL	7	1.22071	0.101725		1.88525	0.04046		1.41918	0.031133	1.91063	0.073778
304	313	KSFTVEKGIY	9	2.58514	0.047606		3.15473	0.058265		2.51724	0.094365	3.10196	0.088016
304	317	KSFTVEKGIYQTSN	13	4.20799	0.097819		4.92697	0.089677		4.16622	0.170806	5.04197	0.004876
304	318	KSFTVEKGIYQTSNF	14	4.32743	0.082188		5.23675	0.051182		4.21143	0.059436	5.27958	0.031265
306	313	FTVEKGIY	7	2.10238	0.038038		2.61189	0.052856		2.11025	0.063444	2.67141	0.027063
306	317	FTVEKGIYQTSN	11	3.68155	0.189459		4.41325	0.123394		3.66895	0.192778	4.57776	0.114991
306	318	FTVEKGIYQTSNF	12	3.80084	0.07522		4.63313	0.079092		3.79811	0.155733	4.86785	0.021541
310	318	KGIYQTSNF	8	1.88792	0.041748		2.52473	0.057561		1.92937	0.099702	2.50629	0.039639
318	325	FRVQPTES	6	2.01855	0.005867		2.11014	0.040579		1.89264	0.085757	2.11157	0.028684
318	326	FRVQPTESI	7	2.20518	0.070707		2.95244	0.098158		2.48053	0.138082	3.17042	0.177473
324	334	ESIVRFPNITN	9	1.10962	0.212551		1.63322	0.228003		1.2959	0.093399	1.74946	0.043073
327	338	VRFPNITNLCPF	9	3.89493	0.036951		4.91679	0.034245		4.05376	0.102603	5.34306	0.037292
337	348	PFGEVFNATRFA	10	0.516473	0.018766		1.75101	0.051794		0.71762	0.016916	1.73164	0.013768
340	359	EVFNATRFASVYAWNRKRIS	19	2.35831	0.028162		3.50784	0.133158		1.95298	0.052556	2.8305	0.059356
348	361	ASVYAWNRKRISNC	13	1.67585	0.040606		2.74026	0.098637		1.74726	0.007921	2.33593	0.208989
351	361	YAWNRKRISNC	10	1.25892	0.069196		1.79144	0.096143		1.2091	0.102647	1.62959	0.057776
356	375	KRISNCVADYSVLYNSASFS	19	1.93755	0.076599		2.59348	0.052665		2.02404	0.102325	2.77951	0.080167
375	387	STFKCYGVSPTKL	11	3.75056	0.063607		4.05428	0.028046		3.5776	0.052948	4.09923	0.039528
377	387	FKCYGVSPTKL	9	3.14837	0.087862		3.47209	0.085411		3.22283	0.131809	3.48853	0.091347
378	387	KCYGVSPTKL	8	2.91791	0.035172		3.12902	0.040972		2.67524	0.111926	2.92743	0.017857
386	407	KLNDLCFTNVYADSFVIRGDEV	21	3.07022	0.077302		6.46718	0.021404		3.1673	0.11278	6.49807	0.033525
393	399	TNVYADS	6	0.29091	0.007076		0.854915	0.040961		0.391007	0.026953	0.778495	0.008579
393	400	TNVYADSF	7	0.289142	0.024854		0.77441	0.072148		0.316992	0.024503	0.498483	0.02521
400	406	FVIRGDE	6	0.206238	0.023743		0.384174	0.016515		0.077889	0.013411	0.190853	0.009546
400	416	FVIRGDEVRQIAPGQTG	15	2.55894	0.014125		2.65776	0.04235		2.45791	0.111596	2.83534	0.067627
400	421	FVIRGDEVRQIAPGQTGKIADY	20	2.49861	0.028656		3.93168	0.05916		2.06977	0.065906	3.23966	0.17465
400	422	FVIRGDEVRQIAPGQTGKIADYN	21	2.64823	0.031746		4.25779	0.046661		2.45392	0.096257	3.65289	0.005882
401	420	VIRGDEVRQIAPGQTGKIAD	18	2.79286	0.061628		4.31228	0.095426		2.57722	0.051947	3.65634	0.084971
401	421	VIRGDEVRQIAPGQTGKIADY	19	2.67948	0.073721		4.29572	0.109899		2.614	0.18991	3.68477	0.088255
402	413	IRGDEVRQIAPG	10	2.55493	0.072596		2.84118	0.036696		2.26386	0.159597	2.50483	0.338715
407	420	VRQIAPGQTGKIAD	12	2.06206	0.045699		3.10253	0.030833		1.91263	0.108653	2.66421	0.054452
407	421	VRQIAPGQTGKIADY	13	2.00533	0.061136		3.20738	0.0394		1.9631	0.096988	2.71495	0.052691
407	422	VRQIAPGQTGKIADYN	14	2.11254	0.02465		3.36179	0.027127		2.01644	0.113567	2.83774	0.030349
412	420	PGQTGKIAD	7	1.42507	0.037478		2.06333	0.051315		1.28262	0.080613	1.75499	0.033093
421	429	YNYKLPDDF	7	0.548176	0.020386		0.925383	0.019409		0.564715	0.037202	0.715628	0.021056
422	431	NYKLPDDFTG	8	0.897271	0.017843		1.13849	0.038692		0.800485	0.049046	0.990077	0.038239
423	429	YKLPDDF	5	0.427328	0.020278		0.5703	0.02524		0.429165	0.026451	0.489703	0.02809
423	431	YKLPDDFTG	7	0.680108	0.021283		0.812806	0.02214		0.636113	0.016376	0.721352	0.030515
425	431	LPDDFTG	5	0.449343	0.039728		0.571561	0.078989		0.444325	0.036734	0.497378	0.048906
432	441	CVIAWNSNNL	9	2.02606	0.01585		2.15117	0.00745		1.88618	0.071213	2.18335	0.029261
433	448	VIAWNSNNLDSKVGGN	15	0.830146	0.025855		1.15377	0.040369		0.83867	0.035821	1.12403	0.042609
434	441	IAWNSNNL	7	1.91141	0.047822		1.98511	0.057476		1.81513	0.108463	2.01445	0.029587
442	449	DSKVGGNY	7	2.34611	0.014346		2.33907	0.037826		2.25065	0.077406	2.36107	0.036348
442	452	DSKVGGNYNYL	10	3.35918	0.042937		3.66044	0.058784		3.099	0.135969	3.69093	0.027914
444	452	KVGGNYNYL	8	2.56003	0.033709		2.94215	0.060778		2.20597	0.070382	2.61859	0.037962
453	467	YRLFRKSNLKPFERD	13	1.06839	0.123363		2.2747	0.118724		0.633195	0.230199	1.64565	0.108717
456	467	FRKSNLKPFERD	10	0.793066	0.046421		2.00323	0.073506		0.821511	0.066117	1.59238	0.020703
456	469	FRKSNLKPFERDIS	12	2.00629	0.042266		3.37871	0.099847		1.94401	0.047433	2.98629	0.051401
456	470	FRKSNLKPFERDIST	13	2.27115	0.016865		3.39046	0.017651		2.15339	0.071239	3.08944	0.074999
456	471	FRKSNLKPFERDISTE	14	3.06446	0.112527		4.34861	0.123017		3.05236	0.09779	4.17159	0.073814
471	486	EIYQAGSTPCNGVEGF	14	4.37115	0.117515		4.4163	0.115182		4.14433	0.213632	4.52806	0.011549
471	487	EIYQAGSTPCNGVEGFN	15	4.91124	0.052254		4.93654	0.142176		4.62837	0.17118	4.98797	0.223757
472	486	IYQAGSTPCNGVEGF	13	4.13278	0.118879		4.04159	0.107055		3.93317	0.221507	4.15531	0.12813
472	487	IYQAGSTPCNGVEGFN	14	4.60575	0.00774		4.75145	0.081695		4.49466	0.209621	4.87813	0.119053
476	498	GSTPCNGVEGFNCYFPLQSYGFQ	20	7.90607	0.116045		8.67144	0.115784		6.94171	0.195953	8.14205	0.041149
477	500	STPCNGVEGFNCYFPLQSYGFQPT	20	7.65686	0.164184		8.67699	0.143416		6.50131	0.212795	7.87065	0.063194
479	486	PCNGVEGF	6	2.13934	0.06347		2.30792	0.052002		2.04385	0.037489	2.16854	0.008158
487	494	NCYFPLQS	6	1.6285	0.050797		2.29775	0.049157		1.44289	0.002158	2.02567	0.012172
487	495	NCYFPLQSY	7	1.66021	0.022997		2.74684	0.070343		1.47628	0.032772	2.37913	0.053411
488	495	CYFPLQSY	6	1.29582	0.044565		2.27694	0.03192		1.06999	0.047818	1.84958	0.063299
488	496	CYFPLQSYG	7	1.49728	0.160177		2.6722	0.033222		1.30669	0.131604	2.22927	0.073964
488	502	CYFPLQSYGFQPTNG	12	2.99542	0.092747		4.09286	0.076477		2.69139	0.099318	3.68489	0.023367
490	512	FPLQSYGFQPTNGVGYQPYRVVV	19	4.8418	0.025373		5.52289	0.113258		3.92961	0.092344	5.09639	0.104603
491	510	PLQSYGFQPTNGVGYQPYRV	16	4.86868	0.051918		5.40417	0.06705		4.11834	0.138831	5.16835	0.052266
491	512	PLQSYGFQPTNGVGYQPYRVVV	18	4.67508	0.049907		5.25	0.038521		4.07317	0.090131	4.95514	0.023201
495	510	YGFQPTNGVGYQPYRV	13	3.67615	0.039061		3.95789	0.054977		3.04425	0.048513	3.59738	0.024854
495	512	YGFQPTNGVGYQPYRVVV	15	3.58966	0.096591		3.804	0.039645		3.03514	0.131137	3.56503	0.032654
495	513	YGFQPTNGVGYQPYRVVVL	16	3.84057	0.128071		4.41955	0.052593		3.30286	0.065931	4.24188	0.07467
496	510	GFQPTNGVGYQPYRV	12	3.41535	0.031191		3.52383	0.044214		2.79717	0.161528	3.33289	0.04803
503	510	VGYQPYRV	6	1.07072	0.04195		1.13163	0.021071		0.718551	0.039557	0.940613	0.016
514	533	SFELLHAPATVCGPKKSTNL	17	3.95865	0.078178		4.41835	0.010787		3.86468	0.190561	4.42995	0.170936
515	533	FELLHAPATVCGPKKSTNL	16	3.49879	0.080018		3.93332	0.063459		3.53262	0.177246	4.08753	0.073692
516	533	ELLHAPATVCGPKKSTNL	15	2.98348	0.101258		3.238	0.100486		2.8665	0.11746
517	532	LLHAPATVCGPKKSTN	13	2.18077	0.198585		2.6553	0.216148		2.45472	0.180192	2.63844	0.118578
517	533	LLHAPATVCGPKKSTNL	14	2.92306	0.17156		3.28102	0.077707		2.98381	0.212275	3.45014	0.150818
518	533	LHAPATVCGPKKSTNL	13	2.78308	0.215721		3.21818	0.144879		2.87896	0.177705	3.27285	0.122853
521	533	PATVCGPKKSTNL	10	2.32436	0.064147		2.58595	0.077795		2.28376	0.193873	2.63156	0.181454
534	541	VKNKCVNF	7	0.840674	0.012701		1.80912	0.008813		0.939233	0.004919	1.6927	0.013646
542	552	NFNGLTGTGVL	10	1.63864	0.065783		3.01654	0.085988		1.91157	0.100479	3.11592	0.014607
543	555	FNGLTGTGVLTES	12	3.54072	0.039881		3.61316	0.006131		3.43955	0.172686	3.45954	0.032436
544	552	NGLTGTGVL	8	1.14645	0.02794		2.40893	0.058173		1.3916	0.08687	2.41846	0.041229
546	552	LTGTGVL	6	0.996833	0.012777		1.97769	0.017442		1.20539	0.048397	1.93162	0.034573
553	564	TESNKKFLPFQQ	10	3.68521	0.024869		3.62467	0.017724		3.49756	0.078961	3.76532	0.04587
553	565	TESNKKFLPFQQF	11	3.44068	0.051863		3.32457	0.04628		3.19634	0.157544	3.4117	0.007151
553	568	TESNKKFLPFQQFGRD	14	3.94211	0.048372		4.0275	0.063775		3.76397	0.094845	4.07423	0.002622
555	568	SNKKFLPFQQFGRD	12	3.79462	0.035311		3.8739	0.116914		3.63207	0.211958	3.85334	0.059142
569	575	IADTTDA	6	1.27796	0.019942		1.36318	0.0358		1.54827	0.020677	1.72589	0.024415
569	581	IADTTDAVRDPQT	11	2.43931	0.015854		3.68048	0.0105		2.58319	0.002738	3.53885	0.030608
569	582	IADTTDAVRDPQTL	12	2.52584	0.024949		3.92615	0.013024		2.73441	0.084894	3.97608	0.026665
569	583	IADTTDAVRDPQTLE	13	2.9592	0.093166		4.9718	0.089767		3.604	0.15762	5.06631	0.046927
575	582	AVRDPQTL	6	1.44512	0.016348		2.35302	0.015654		1.68576	0.05798	2.34318	0.036585
575	583	AVRDPQTLE	7	1.756	0.015645		3.16429	0.009999		2.20243	0.094767	3.23659	0.040939
576	582	VRDPQTL	5	1.34985	0.03125		2.0141	0.029475		1.27461	0.097175	1.72944	0.051105
576	583	VRDPQTLE	6	1.47924	0.007124		2.62844	0.021925		1.74111	0.028472	2.66798	0.037743
584	592	ILDITPCSF	7	1.27871	0.034117		2.11661	0.027934		1.38904	0.082435	2.08999	0.017681
584	596	ILDITPCSFGGVS	11	2.61213	0.025085		3.75818	0.085632		2.79523	0.120802	3.8026	0.043191
585	592	LDITPCSF	6	1.40889	0.031412		2.17298	0.013779		1.48205	0.060446	2.09951	0.030299
586	592	DITPCSF	5	1.02617	0.00863		1.44041	0.02657		0.988933	0.054811	1.33883	0.017252
586	596	DITPCSFGGVS	9	2.47147	0.051447		3.1316	0.019844		2.48488	0.010774	3.12943	0.023578
599	615	TPGTNTSNQVAVLYQDV	15	3.56688	0.109644		3.76214	0.112162		3.35256	0.182559	3.74299	0.063215
617	632	CTEVPVAIHADQLTPT	13	1.97734	0.04685		2.23728	0.052177		3.51039	0.05027	4.02225	0.103817
621	633	PVAIHADQLTPTW	10	2.83704	0.09387		2.80589	0.072955		2.75575	0.095044	2.90325	0.07847
627	633	DQLTPTW	5	1.96308	0.020734		2.09051	0.021398		1.88826	0.083006	2.09097	0.025119
627	635	DQLTPTWRV	7	3.19615	0.043122		3.29619	0.056461		3.03843	0.129589	3.36839	0.043432
627	643	DQLTPTWRVYSTGSNVF	15	6.70619	0.073629		7.34934	0.097827		6.81672	0.063385	7.48944	0.105831
634	642	RVYSTGSNV	8	2.72768	0.020872		2.88681	0.049795		2.63893	0.103071	2.81663	0.043064
634	643	RVYSTGSNVF	9	2.43266	0.05152		2.69452	0.027717		2.38082	0.123926	2.73826	0.039443
636	642	YSTGSNV	6	2.05604	0.055045		2.19513	0.057976		1.92197	0.037423	2.23385	0.075405
636	643	YSTGSNVF	7	1.63363	0.023688		1.90969	0.078809		1.58448	0.100415	1.98944	0.053361
642	650	VFQTRAGCL	8	2.11626	0.030537		2.62327	0.0563		2.09388	0.119087	2.58212	0.048636
643	650	FQTRAGCL	7	1.76802	0.02296		2.33586	0.024915		1.71671	0.066913	2.15708	0.041879
644	650	QTRAGCL	6	1.78304	0.011664		2.21992	0.053319		1.85517	0.110085	2.14146	0.047193
648	665	GCLIGAEHVNNSYECDIP	16	0.923936	0.096494		1.28923	0.088544		1.03624	0.056421	1.36213	0.053571
662	671	CDIPIGAGIC	8	2.1936	0.059184		3.03679	0.007395		2.19936	0.001037	3.08289	0.016116
664	671	IPIGAGIC	6	1.99785	0.040775		2.54544	0.064548		2.11215	0.082831	2.65739	0.024649
664	673	IPIGAGICAS	8	3.92228	0.032887		5.02412	0.033172		4.16119	0.127264	5.22768	0.004574
665	671	PIGAGIC	5	1.30561	0.033721		1.72492	0.040063		1.35451	0.015626	1.77697	0.030849
672	686	ASYQTQTNSPGSASS	13	4.84633	0.014453		5.22041	0.022855		4.57601	0.064336	4.82503	0.067242
672	690	ASYQTQTNSPGSASSVASQ	17	6.67779	0.056506		6.71297	0.117025		6.9331	0.244442	7.02183	0.032252
672	692	ASYQTQTNSPGSASSVASQSI	19	7.69767	0.030816		7.80454	0.030816		8.05503	0.25089	8.33149	0.085707
672	694	ASYQTQTNSPGSASSVASQSIIA	21	8.86663	0.077559		9.20336	0.072929		8.97164	0.173578	9.84352	0.096768
673	690	SYQTQTNSPGSASSVASQ	16	5.6185	0.113817		5.92656	0.146365		6.04483	0.116976	6.36074	0.129312
674	690	YQTQTNSPGSASSVASQ	15	4.62276	0.015364		4.98334	0.093549		4.95915	0.253104	5.20729	0.08859
674	694	YQTQTNSPGSASSVASQSIIA	19	7.43953	0.00295		7.59638	0.136712		7.3261	0.26852	8.01024	0.070612
675	690	QTQTNSPGSASSVASQ	14	4.2543	0.056985		4.81495	0.028929		4.37338	0.004769	4.95123	0.072823
675	694	QTQTNSPGSASSVASQSIIA	18	6.66595	0.04477		7.36933	0.018821		6.51309	0.025361	7.46167	0.034037
688	695	ASQSIIAY	7	0.714233	0.046433		1.6832	0.050011		0.884601	0.055939	1.57728	0.04458
693	699	IAYTMSL	6	3.31033	0.020494		3.43958	0.056027		3.11022	0.059107	3.55183	0.087147
695	702	YTMSLGAE	7	3.19295	0.025486		3.1457	0.037126		3.08345	0.113101	3.24363	0.050548
696	704	TMSLGAENS	8	2.96995	0.008897		3.03612	0.046977		2.87765	0.142553	3.00855	0.085705
700	706	GAENSVA	6	2.1746	0.011208		2.15563	0.012385		2.04716	0.021083	2.2111	0.03675
715	730	PTNFTISVTTEILPVS	13	2.01118	0.014554		3.21876	0.048204		1.92599	0.016454	2.90833	0.061196
724	731	TEILPVSM	6	0.566097	0.034094		0.780452	0.024756		0.49478	0.015143	0.721993	0.020381
725	731	EILPVSM	5	0.16965	0.023648		0.350952	0.030741		0.143701	0.008202	0.310642	0.014825
728	739	PVSMTKTSVDCT	10	3.07816	0.018551		4.03264	0.100821		3.20101	0.131285	4.26289	0.082884
732	739	TKTSVDCT	7	1.68232	0.004697		2.33684	0.013777		1.7517	0.055887	2.33999	0.020693
732	741	TKTSVDCTMY	9	2.10356	0.046083		3.81863	0.023297		2.40922	0.113667	3.90699	0.07558
740	748	MYICGDSTE	8	2.06351	0.024745		2.84068	0.046621		2.03512	0.060318	2.9313	0.021811
741	748	YICGDSTE	7	1.36689	0.036103		1.62315	0.05079		1.2251	0.051693	1.50135	0.065246
742	748	ICGDSTE	6	1.23738	0.024234		1.32845	0.01607		1.30348	0.038976	1.34266	0.040161
753	759	LLQYGSF	6	1.91768	0.052808		1.95109	0.03745		1.69609	0.055323	1.84177	0.032497
763	769	LNRALTG	6	1.06198	0.020163		2.1437	0.028142		1.10768	0.044306	2.08174	0.018737
764	771	NRALTGIA	7	1.05268	0.008384		2.21852	0.02483		1.06294	0.030154	2.17932	0.013785
770	780	IAVEQDKNTQE	10	0.64625	0.025863		2.07842	0.026197		0.840967	0.0655	1.96202	0.022566
770	781	IAVEQDKNTQEV	11	0.65374	0.050704		2.07703	0.01998		0.73423	0.025965	1.91167	0.061895
770	782	IAVEQDKNTQEVF	12	0.846771	0.018495		2.05133	0.026581		0.871071	0.001602	1.91965	0.015431
774	782	QDKNTQEVF	8	0.511379	0.011855		1.36037	0.005037		0.668562	0.009739	1.21968	0.014226
781	802	VFAQVKQIYKTPPIKDFGGFNF	19	2.77752	0.040037		3.60478	0.038433		2.7063	0.090683	3.7629	0.02331
783	796	AQVKQIYKTPPIKD	11	4.93623	0.067866		5.01773	0.091663		4.7837	0.187763	5.09985	0.040633
784	796	QVKQIYKTPPIKD	10	4.96128	0.105844		4.86925	0.094631		4.8992	0.19535	4.97302	0.050273
800	815	FNFSQILPDPSKPSKR	12	3.03718	0.108084		3.20462	0.054669		2.85032	0.101919	3.35245	0.260975
821	828	LLFNKVTL	7	2.28575	0.041164		2.34586	0.018662		2.09747	0.081668	2.36381	0.019308
822	828	LFNKVTL	6	2.23269	0.037803		2.1376	0.054741		2.04274	0.105551	2.16429	0.025194
822	833	LFNKVTLADAGF	11	3.95001	0.039256		4.081	0.083679		3.30779	0.180698	4.68204	0.018902
823	832	FNKVTLADAG	9	3.51476	0.043822		3.37739	0.067706		3.17371	0.087104	3.38113	0.02712
823	833	FNKVTLADAGF	10	3.39545	0.061275		3.35393	0.034005		3.16963	0.074305	3.52862	0.020404
824	833	NKVTLADAGF	9	3.63921	0.047039		3.53717	0.070742		3.42442	0.066991	3.71642	0.022617
833	841	FIKQYGDCL	8	2.64157	0.05854		2.67812	0.056939		2.61066	0.079869	2.6205	0.090419
834	840	IKQYGDC	6	1.87891	0.031608		1.89235	0.061196		1.90656	0.059088	1.88191	0.063986
834	841	IKQYGDCL	7	2.23312	0.066288		2.22487	0.037223		2.00319	0.003829	2.16465	0.030222
834	848	IKQYGDCLGDIAARD	14	5.26077	0.076965		5.11077	0.028981		4.67434	0.091431	5.24427	0.036271
842	848	GDIAARD	6	2.47218	0.010694		2.47764	0.031411		2.19822	0.092545	2.4331	0.049983
848	862	DLICAQKFNGLTVLP	13	1.87351	0.028227		3.02477	0.044742		1.80133	0.06697	2.66719	0.01612
852	858	AQKFNGL	6	1.62201	0.050873		1.93931	0.013433		1.61867	0.059481	1.93608	0.0359
858	865	LTVLPPLL	5	1.73491	0.040201		1.7362	0.011743		1.49333	0.062159	1.73546	0.016838
858	866	LTVLPPLLT	6	2.62514	0.046804		2.61004	0.01333		2.27179	0.077091	2.57249	0.03392
859	865	TVLPPLL	4	1.2628	0.014539		1.33074	0.017141		1.11156	0.035525	1.2899	0.024721
859	866	TVLPPLLT	5	1.89349	0.033896		1.90883	0.026474		1.67691	0.051455	1.91335	0.041092
870	877	IAQYTSAL	7	1.42533	0.015645		2.42476	0.032574		1.39437	0.045767	2.37703	0.037985
877	885	LLAGTITSG	8	3.6199	0.043187		3.82742	0.06265		3.57755	0.091772	3.82508	0.078776
877	886	LLAGTITSGW	9	2.58382	0.060508		2.59119	0.063736		2.39927	0.041653	2.65082	0.029096
878	885	LAGTITSG	7	2.75606	0.032701		2.8868	0.031952		2.66123	0.097459	2.77865	0.021021
878	891	LAGTITSGWTFGAG	13	6.76364	0.049675		6.99648	0.028983		6.66914	0.110164	6.93482	0.09285
878	893	LAGTITSGWTFGAGAA	15	5.92495	0.146687		6.27487	0.093768		5.86898	0.064419	6.21114	0.137611
886	893	WTFGAGAA	7	3.01921	0.005617		3.1313	0.004389		3.03989	0.021304	3.25987	0.038715
886	898	WTFGAGAALQIPF	11	0.897137	0.045077		1.60297	0.0216		1.12394	0.085168	1.43474	0.059707
889	898	GAGAALQIPF	8	1.31454	0.037441		2.65445	0.053186		1.40813	0.054528	2.56688	0.030071
892	899	AALQIPFA	6	3.08774	0.024209		3.0238	0.028626		2.68235	0.061799	2.85498	0.037651
892	901	AALQIPFAMQ	8	4.12491	0.048539		4.11946	0.048164		3.78423	0.158061	4.1883	0.039949
892	902	AALQIPFAMQM	9	4.8686	0.034441		4.91543	0.094383		4.49574	0.061629	5.00683	0.067938
894	901	LQIPFAMQ	6	2.5684	0.028384		2.64438	0.030212		2.68353	0.052554	2.81257	0.017193
894	902	LQIPFAMQM	7	3.44276	0.050468		3.55764	0.032227		3.20795	0.093297	3.57049	0.043972
902	916	MAYRFNGIGVTQNVL	14	5.77715	0.047499		7.4804	0.069217		6.07081	0.146396	7.49793	0.001122
903	916	AYRFNGIGVTQNVL	13	4.52658	0.074089		5.75124	0.045956		4.66165	0.113528	6.04173	0.032409
904	916	YRFNGIGVTQNVL	12	4.72313	0.031133		5.94126	0.044864		4.83643	0.141177	5.79012	0.007108
905	916	RFNGIGVTQNVL	11	3.99754	0.048182		5.05588	0.057648		4.09369	0.216322	5.05723	0.057561
907	913	NGIGVTQ	6	0.121468	0.010561		0.285038	0.009765		0.040313	0.014103	0.117722	0.0034
907	916	NGIGVTQNVL	9	3.75905	0.018534		4.63835	0.061087		3.88859	0.11501	4.8183	0.048653
909	916	IGVTQNVL	7	2.76535	0.032292		3.40457	0.056944		2.86658	0.088674	3.54146	0.050273
917	924	YENQKLIA	7	2.02078	0.016765		2.86648	0.050303		1.94141	0.010504	2.92666	0.045853
923	930	IANQFNSA	7	0.742685	0.027579		2.05722	0.01707		0.827986	0.008431	1.88963	0.026164
923	938	IANQFNSAIGKIQDSL	15	4.39406	0.103168		6.02924	0.138852		4.37807	0.080923	5.81089	0.113343
923	941	IANQFNSAIGKIQDSLSST	18	3.25737	0.038168		3.22718	0.070384		2.71543	0.072117	3.09238	0.104949
923	945	IANQFNSAIGKIQDSLSSTASAL	22	8.99817	0.044377		10.5539	0.125794		8.85205	0.115989	10.7787	0.133911
925	938	NQFNSAIGKIQDSL	13	4.27111	0.104646		5.68523	0.123044		4.44414	0.133243	5.82772	0.102507
927	945	FNSAIGKIQDSLSSTASAL	18	8.20786	0.082669		8.87834	0.03808		7.93577	0.007446	9.29529	0.128006
928	936	NSAIGKIQD	8	2.62135	0.030518		3.18822	0.021145		2.9496	0.07461	3.17797	0.09869
928	938	NSAIGKIQDSL	10	3.7549	0.009126		4.24942	0.047431		3.71745	0.040919	4.37529	0.07009
928	945	NSAIGKIQDSLSSTASAL	17	7.82202	0.078842		8.30565	0.028988		7.65432	0.049414	8.68774	0.062247
931	938	IGKIQDSL	7	2.15367	0.033185		2.33612	0.02872		3.29306	0.075671	3.82829	0.136781
932	943	GKIQDSLSSTAS	11	4.52244	0.046183		4.38562	0.068315		3.68114	0.16587	4.03411	0.058984
937	945	SLSSTASAL	8	3.33974	0.048751		3.29454	0.042711		3.13728	0.046319	3.3672	0.024073
939	945	SSTASAL	6	2.46452	0.012765		2.39013	0.038442		2.36074	0.108195	2.44986	0.042879
939	956	SSTASALGKLQDVVNQNA	17	8.64248	0.012417		8.93043	0.012417		8.30366	0.269795	9.43656	0.130061
939	961	SSTASALGKLQDVVNQNAQALNT	22	12.1799	0.123254		12.7537	0.135696		11.6185	0.313565	13.047	0.20458
946	954	GKLQDVVNQ	8	3.43143	0.070299		4.09704	0.022995		3.00547	0.074748	3.52432	0.041399
946	961	GKLQDVVNQNAQALNT	15	8.10593	0.021103		8.72983	0.05676		7.7562	0.190771	8.88526	0.075661
951	959	VVNQNAQAL	8	3.82178	0.031266		3.75215	0.068108		3.43097	0.094093	3.72293	0.031952
951	961	VVNQNAQALNT	10	4.62956	0.042405		4.7386	0.022963		4.28565	0.16525	4.65866	0.074678
960	970	NTLVKQLSSNF	10	4.3496	0.017379		4.5639	0.043132		4.15648	0.082388	4.55721	0.059259
962	969	LVKQLSSN	7	2.84777	0.026085		2.80897	0.011431		4.2745	0.016374	5.02277	0.009277
962	970	LVKQLSSNF	8	3.04562	0.037304		3.02402	0.073254		2.6027	0.103328	2.75871	0.037141
962	974	LVKQLSSNFGAIS	12	5.35245	0.038784		5.29277	0.017372		2.85312	0.126181	3.06908	0.036493
962	977	LVKQLSSNFGAISSVL	15	7.31104	0.074777		7.23266	0.033654		4.86674	0.043057	5.33426	0.078701
963	970	VKQLSSNF	7	2.37036	0.044754		2.3206	0.062747		6.49479	0.225284	7.30305	0.227808
964	970	KQLSSNF	6	2.68082	0.014949		2.66828	0.018207		2.0807	0.09538	2.23387	0.031832
970	977	FGAISSVL	7	2.82344	0.053547		2.67526	0.069464		2.40359	0.021419	2.65331	0.030663
971	977	GAISSVL	6	2.28363	0.044347		2.26058	0.030675		2.49942	0.015655	2.74604	0.034448
980	990	ILSRLDPPEAE	8	2.2536	0.019589		2.24207	0.036341		1.99899	0.030095	2.20667	0.043406
980	992	ILSRLDPPEAEVQ	10	3.65323	0.023132		3.53806	0.046859		2.07945	0.002766	2.25338	0.029555
982	989	SRLDPPEA	5	1.78639	0.029727		1.72688	0.062982		3.31759	0.095871	3.56159	0.061497
982	990	SRLDPPEAE	6	1.96525	0.017806		1.91389	0.026651		1.73534	0.022519	1.77751	0.031757
982	992	SRLDPPEAEVQ	8	3.29677	0.027342		3.20671	0.052443		1.80598	0.060957	1.9138	0.033857
990	996	EVQIDRL	6	2.31364	0.093721		2.24156	0.092051		3.04388	0.108095	3.23945	0.0382
993	1001	IDRLITGRL	8	2.89289	0.03959		3.18772	0.030904		2.22278	0.174704	2.28421	0.119989
994	1001	DRLITGRL	7	2.64432	0.029293		2.97548	0.031469		2.71504	0.075252	3.21272	0.040222
997	1006	ITGRLQSLQT	9	1.82301	0.068085		3.31441	0.171571		2.58356	0.067771	2.98266	0.027827
1018	1024	IRASANL	6	1.12713	0.03471		2.30158	0.164665		2.09098	0.136981	3.026	0.093515
1025	1031	AATKMSE	6	0.451405	0.032122		1.06022	0.043424		1.06267	0.049288	2.05958	0.17958
1032	1042	CVLGQSKRVDF	10	2.15992	0.035472		2.62193	0.067729		0.514072	0.035371	0.958641	0.041053
1032	1046	CVLGQSKRVDFCGKG	14	3.17025	0.047894		3.13989	0.064944		2.04963	0.09901	2.60504	0.048693
1032	1049	CVLGQSKRVDFCGKGYHL	17	2.52299	0.069598		3.13482	0.037547		3.00723	0.160688	3.12537	0.067328
1034	1042	LGQSKRVDF	8	1.77694	0.032211		2.16929	0.045814		2.41829	0.126062	3.30384	0.006626
1034	1049	LGQSKRVDFCGKGYHL	15	2.27246	0.112662		2.7505	0.078779		1.77568	0.07786	2.21465	0.051391
1035	1042	GQSKRVDF	7	1.61552	0.026457		1.69332	0.040452		2.16778	0.127613	2.95691	0.029726
1043	1049	CGKGYHL	6	0.397738	0.015493		0.636933	0.019732		1.57637	0.034467	1.63942	0.057842
1047	1062	YHLMSFPQSAPHGVVF	13	0.399781	0.049726		0.643606	0.097742		0.430824	0.023239	0.559163	0.008917
1049	1059	LMSFPQSAPHG	8	0.37786	0.010023		1.18473	0.014955		0.276319	0.076117	0.458597	0.176769
1053	1062	PQSAPHGVVF	7	0.280237	0.007791		0.529247	0.030181		0.431881	0.019601	0.790078	0.005232
1069	1079	PAQEKNFTTAP	8	1.94214	0.149499		2.63492	0.043145		0.268185	0.012012	0.362691	0.041143
1079	1095	PAICHDGKAHFPREGVF	14	1.01696	0.085886		1.4528	0.070526		1.92467	0.080458	2.78998	0.227772
1091	1099	REGVFVSNG	8	2.09053	0.034054		2.37048	0.062683		1.07641	0.077998	1.40262	0.085528
1103	1116	FVTQRNFYEPQIIT	12	2.05604	0.044813		3.50047	0.004128		2.06881	0.098512	2.46582	0.055382
1103	1117	FVTQRNFYEPQIITT	13	2.46517	0.055893		3.70955	0.067218		1.99649	0.093904	3.34287	0.00795
1109	1116	FYEPQIIT	6	0.877757	0.0346		1.45626	0.03003		2.38213	0.115787	3.68462	0.002769
1109	1117	FYEPQIITT	7	1.40842	0.044565		1.96979	0.037541		0.950881	0.023514	1.47506	0.053355
1110	1117	YEPQIITT	6	1.40326	0.024534		2.1426	0.14928		1.35274	0.016472	1.93606	0.034055
1118	1127	DNTFVSGNCD	9	2.96288	0.069308		2.967	0.08551		1.38764	0.05704	1.81301	0.122363
1121	1127	FVSGNCD	6	1.3793	0.022654		1.46319	0.034712		2.86535	0.032762	2.86711	0.105242
1136	1145	TVYDPLQPEL	7	2.90985	0.061593		2.67192	0.091213		1.34682	0.052988	1.41727	0.047743
1148	1169	FKEELDKYFKNHTSPDVDLGDI	20	9.36577	0.072908		9.77312	0.027338		2.59198	0.132949	2.95491	0.015052
1167	1173	GDISGIN	6	2.13067	0.02393		2.04355	0.05064		8.89181	0.264607	9.87971	0.006702
1174	1186	ASVVNIQKEIDRL	12	6.36524	0.075289		5.99388	0.048548		1.97373	0.067302	2.11059	0.040604
1175	1186	SVVNIQKEIDRL	11	5.6764	0.045703		5.45153	0.051187		5.6315	0.092944	6.15886	0.095799
1175	1188	SVVNIQKEIDRLNE	13	6.66626	0.064369		6.33623	0.076416		5.15293	0.177759	5.58461	0.066189
1176	1186	VVNIQKEIDRL	10	5.48274	0.052082		5.28968	0.086113		5.89342	0.134514	6.34833	0.025674
1177	1188	VNIQKEIDRLNE	11	5.80627	0.111614		5.84125	0.119539		5.10602	0.24038	5.35379	0.051157
1178	1186	NIQKEIDRL	8	4.81384	0.024387		4.64341	0.050105		5.39049	0.136376	5.81321	0.014096
1179	1188	IQKEIDRLNE	9	2.99031	0.04678		2.947	0.072068		4.51525	0.198427	4.871	0.102369
1187	1197	NEVAKNLNESL	10	1.21144	0.044674		1.78791	0.143074		2.74182	0.058082	2.91417	0.094216
1201	1213	QELGKYEQVDGSA	12	4.71238	0.052544		4.54551	0.105822		1.31975	0.099758	1.69957	0.052463

## Sheet: Table S2
	Table S2: Deuterium exchange at indicated labeling times for RBDisolated and ACE2 bound RBDisolated
					RBD(isolated)									RBD(islolated):ACE2 complex
					1 min			10 min			100 min			1 min			10 min			100 min
Start	End	Sequence	MaxUptake	MHP	Uptake	Uptake SD		Uptake	Uptake SD		Uptake	Uptake SD		Uptake	Uptake SD		Uptake	Uptake SD		Uptake	Uptake SD
323	330	TESIVRFP	6	948.515	1.68601	0.029482		1.6338	0.040837		1.8711	0.029686		1.26239	0.017824		1.47966	0.065823		1.69846	0.039874
324	334	ESIVRFPNITN	9	1289.68	1.00891	0.115427		1.59916	0.082468		2.36356	0.071741		1.02745	0.12081		1.51287	0.05985		2.23221	0.03762
351	361	YAWNRKRISNC	10	1410.71	1.09038	0.268595		1.55688	0.107618		2.3154	0.0551		0.79736	0.016471		1.43697	0.078515		2.20214	0.042931
352	361	AWNRKRISNC	9	1247.64	0.825433	0.047433		1.36475	0.068168		1.87861	0.051175		1.13016	0.043089		1.28495	0.067912		1.87483	0.056427
353	361	WNRKRISNC	8	1176.61	0.91435	0.040277		1.59563	0.058058		2.38879	0.05019		0.908279	0.058765		1.36932	0.114753		2.16438	0.140489
365	378	YSVLYNSASFSTFK	13	1613.78	0.625599	0.044719		1.0013	0.023277		1.89013	0.106248		0.719911	0.036473		0.899418	0.018242		1.99601	0.137459
369	393	YNSASFSTFKCYGVSPTKLNDLCFT	23	2793.29	4.81162	0.077371		4.52409	0.119897		4.5012	0.045034		4.24275	0.29079		4.20374	0.027655		4.52319	0.033819
374	387	FSTFKCYGVSPTKL	12	1577.8	3.01298	0.10611		3.36705	0.092397		3.7906	0.105194		4.09222	0.224907		4.72097	0.239909		5.18883	0.175681
375	387	STFKCYGVSPTKL	11	1430.73	2.86298	0.168092		3.14661	0.088269		3.72149	0.056014		3.10256	0.112492		3.31031	0.109475		3.88856	0.064451
377	387	FKCYGVSPTKL	9	1242.66	2.81738	0.149302		2.95883	0.096508		3.07842	0.109471		2.52879	0.230987		2.79576	0.203489		3.27791	0.019951
378	387	KCYGVSPTKL	8	1095.59	2.3988	0.253927		2.47789	0.103112		2.73617	0.014639		2.22056	0.430338		2.38034	0.068264		2.662	0.091372
384	404	PTKLNDLCFTNVYADSFVIRG	19	2373.19	3.58416	0.45726		3.68064	0.049879		4.13272	0.049772		2.9316	0.01094		3.50961	0.09485		4.1722	0.01094
388	395	NDLCFTNV	7	925.408	1.79767	0.023146		2.22414	0.024016		2.39809	0.049742		1.46202	0.137999		2.10188	0.095472		2.3049	0.02533
392	399	FTNVYADS	7	916.405	0.355023	0.057771		1.09715	0.025518		1.78058	0.04834		0.330054	0.012975		0.879065	0.056009		1.45551	0.013085
393	399	TNVYADS	6	769.336	0.391321	0.039009		1.06933	0.020113		1.76954	0.067127		0.424871	0.037146		0.973901	0.033192		1.57256	0.027959
393	400	TNVYADSF	7	916.405	0.328288	0.02804		0.790142	0.042454		1.41051	0.039594		0.254836	0.020356		0.582278	0.037777		1.06894	0.03767
400	406	FVIRGDE	6	835.431	0.118603	0.081407		0.330619	0.003101		0.75621	0.052828		0.123787	0.007585		0.191646	0.029252		0.525933	0.023601
400	407	FVIRGDEV	7	934.499	0.224092	0.022584		0.661468	0.012626		1.42455	0.033392		0.204035	0.007664		0.541372	0.065673		1.23078	0.018249
400	420	FVIRGDEVRQIAPGQTGKIAD	19	2270.23	2.59548	0.030727		3.85714	0.030727		6.26891	0.030727		2.72912	0.030727		3.70933	0.030727		5.94785	0.1074
400	421	FVIRGDEVRQIAPGQTGKIADY	20	2433.29	2.08589	0.029191		3.92686	0.085878		6.48404	0.170225		2.38163	0.167699		3.38866	0.142659		5.83022	0.13487
401	420	VIRGDEVRQIAPGQTGKIAD	18	2123.16	2.49892	0.042811		4.18784	0.136166		6.31039	0.069448		2.63542	0.197965		3.74241	0.13343		6.04802	0.073529
401	421	VIRGDEVRQIAPGQTGKIADY	19	2286.22	2.93866	0.011091		4.01199	0.011091		6.55929	0.062963		2.47833	0.234588		3.7818	0.239847		6.18261	0.024557
407	420	VRQIAPGQTGKIAD	12	1453.81	1.76392	0.224767		2.78199	0.067643		3.98561	0.036232		1.6291	0.193796		2.37732	0.078851		3.7074	0.046422
407	422	VRQIAPGQTGKIADYN	14	1730.92	1.79758	0.20506		2.86822	0.146591		4.51529	0.008419		1.53886	0.185016		2.45193	0.066528		4.17766	0.049311
408	420	RQIAPGQTGKIAD	11	1354.74	1.95396	0.262856		2.71462	0.096485		3.80254	0.023778		1.81225	0.140753		2.49362	0.099439		3.58941	0.137236
408	422	RQIAPGQTGKIADYN	13	1631.85	1.9307	0.18948		2.95669	0.019583		4.28622	0.029931		1.78143	0.121943		2.53185	0.051197		4.13387	0.021203
412	420	PGQTGKIAD	7	886.463	1.3343	0.147824		1.81377	0.074585		2.56927	0.014627		1.19285	0.080939		1.6211	0.015516		2.35968	0.015166
412	421	PGQTGKIADY	8	1049.53	1.19307	0.057281		1.7755	0.059222		2.78346	0.130354		1.19995	0.026871		1.51347	0.064407		2.54891	0.029129
415	421	TGKIADY	6	767.393	1.06318	0.103022		1.50514	0.067703		2.23946	0.038992		0.982045	0.027938		1.37744	0.081516		2.07038	0.320907
415	422	TGKIADYN	7	881.436	1.21037	0.109273		1.66528	0.056214		2.65647	0.054241		0.997072	0.106916		1.55269	0.052317		2.47713	0.061345
421	428	YNYKLPDD	6	1027.47	0.295903	0.059564		0.624959	0.039874		1.68495	0.075991		0.218161	0.017142		0.408897	0.066781		1.32306	0.049643
421	429	YNYKLPDDF	7	1174.54	0.510976	0.054274		0.801252	0.02216		1.77451	0.062288		0.428888	0.050715		0.638216	0.041804		1.49151	0.05813
421	431	YNYKLPDDFTG	9	1332.61	0.831825	0.067109		1.14776	0.06162		2.34721	0.075351		0.675813	0.05857		0.971476	0.055865		2.07305	0.035852
421	433	YNYKLPDDFTGCV	11	1534.69	1.09517	0.177134		1.28263	0.058632		2.4811	0.082181		0.821624	0.050205		1.06351	0.100961		2.28525	0.101313
423	429	YKLPDDF	5	897.435	0.371965	0.006689		0.503345	0.02931		0.848718	0.006689		0.317615	0.047507		0.440328	0.02152		0.757499	0.02305
423	431	YKLPDDFTG	7	1055.5	0.735222	0.00692		0.784187	0.031288		1.33443	0.006938		0.56982	0.073108		0.664125	0.02564		1.2165	0.033796
430	441	TGCVIAWNSNNL	11	1291.61	2.10251	0.008353		2.01442	0.03205		2.41083	0.018556		1.91636	0.008353		1.96354	0.090598		2.31048	0.045856
432	441	CVIAWNSNNL	9	1133.54	1.68186	0.20703		1.63933	0.056647		2.01706	0.050847		1.45117	0.163024		1.63929	0.043957		2.1008	0.022011
432	443	CVIAWNSNNLDS	11	1335.6	2.30443	0.033923		2.01993	0.033923		2.45349	0.095013		2.18537	0.033923		1.97928	0.074038		2.28502	0.033923
433	441	VIAWNSNNL	8	1030.53	2.51883	0.295057		2.26185	0.277236		2.32513	0.108955		1.6414	0.070294		1.92336	0.176461		2.36309	0.039197
434	441	IAWNSNNL	7	931.463	1.58025	0.145339		1.56726	0.075642		1.65983	0.0134		1.30082	0.211496		1.42254	0.010914		1.67373	0.01737
442	449	DSKVGGNY	7	839.389	2.14463	0.226916		2.2126	0.042369		2.22061	0.012755		2.07981	0.17498		2.07581	0.026801		2.29903	0.011808
443	452	SKVGGNYNYL	9	1114.55	2.70105	0.068189		2.76107	0.087558		2.83041	0.039931		2.40892	0.106868		2.60815	0.044324		2.97085	0.055404
444	452	KVGGNYNYL	8	1027.52	2.28367	0.237597		2.65817	0.07095		2.70199	0.018707		2.10569	0.203755		2.47276	0.02581		2.68641	0.009938
456	467	FRKSNLKPFERD	10	1536.83	0.488132	0.019959		1.61406	0.063521		2.19263	0.056298		0.615092	0.04306		1.42601	0.086061		2.26204	0.033041
456	470	FRKSNLKPFERDIST	13	1837.99	1.97853	0.280687		3.39784	0.070607		4.19135	0.090586		2.17388	0.16629		3.12134	0.175743		4.29395	0.093602
460	467	NLKPFERD	6	1018.53	2.65831	0.30849		2.71216	0.049263		2.83923	0.052165		2.67607	0.168442		2.76056	0.033163		3.00705	0.062063
471	482	EIYQAGSTPCNG	10	1239.53	2.90735	0.323853		2.89834	0.076803		2.82148	0.04306		2.40415	0.348136		2.45256	0.094364		2.71628	0.01058
471	486	EIYQAGSTPCNGVEGF	14	1671.73	4.21082	0.023063		3.57697	0.141462		3.67212	0.073243		3.65196	0.023063		3.39422	0.048714		3.76008	0.077413
471	487	EIYQAGSTPCNGVEGFN	15	1785.77	3.95314	0.025664		4.26686	0.141582		4.08362	0.126885		3.36279	0.020429		3.90339	0.082077		4.1519	0.204561
472	486	IYQAGSTPCNGVEGF	13	1542.69	3.38925	0.062957		4.03785	0.013702		4.55391	0.133716		2.54765	0.013702		2.96026	0.058802		3.37928	0.019993
472	487	IYQAGSTPCNGVEGFN	14	1656.73	3.94478	0.062505		3.95823	0.187716		3.93984	0.083435		3.02508	0.020255		3.53485	0.082325		3.92936	0.071183
487	494	NCYFPLQS	6	971.429	1.46952	0.094943		2.14752	0.062486		2.54544	0.020965		1.3294	0.135909		1.84685	0.071639		2.52206	0.035351
487	495	NCYFPLQSY	7	1134.49	1.55918	0.100065		2.55324	0.065636		2.90292	0.024828		1.35068	0.1435		2.21875	0.096585		2.88972	0.062161
487	496	NCYFPLQSYG	8	1191.51	1.87432	0.140032		2.87972	0.055189		3.27549	0.042685		1.71521	0.159348		2.54721	0.11488		3.31239	0.030461
487	502	NCYFPLQSYGFQPTNG	13	1835.81	4.46188	0.246001		5.3148	0.334907		5.83095	0.270829		2.55883	0.008457		3.67623	0.104358		4.42872	0.241084
488	494	CYFPLQS	5	857.386	1.10178	0.095881		1.74882	0.030407		2.15482	0.0372		0.979239	0.098325		1.54524	0.089424		2.10668	0.031572
488	495	CYFPLQSY	6	1020.45	1.17658	0.058904		2.12764	0.019112		2.50563	0.020364		1.00909	0.126223		1.84599	0.111029		2.48997	0.021515
488	502	CYFPLQSYGFQPTNG	12	1721.76	3.07016	0.264043		4.05834	0.094994		4.16418	0.269263		2.59338	0.175911		3.40034	0.166904		4.10519	0.065725
490	510	FPLQSYGFQPTNGVGYQPYRV	17	2418.19	4.1889	0.02071		5.78829	0.19911		6.44225	0.129873		3.80698	0.015346		5.35087	0.015346		6.45679	0.0214
491	510	PLQSYGFQPTNGVGYQPYRV	16	2271.12	4.00673	0.046724		5.13444	0.105936		5.55099	0.130023		3.41399	0.00984		4.32378	0.150095		5.16005	0.074811
491	512	PLQSYGFQPTNGVGYQPYRVVV	18	2469.26	3.76633	0.004839		4.98395	0.117989		5.46024	0.112102		3.40674	0.004839		4.14917	0.042049		5.16258	0.055918
495	512	YGFQPTNGVGYQPYRVVV	15	2044.03	3.07725	0.379353		3.19472	0.155588		3.84957	0.01938		2.26765	0.01938		2.83507	0.07206		3.39951	0.035951
495	513	YGFQPTNGVGYQPYRVVVL	16	2157.11	3.20137	0.39784		3.22554	0.061394		3.89557	0.154146		3.1814	0.014452		3.02353	0.064961		3.58792	0.018906
496	510	GFQPTNGVGYQPYRV	12	1682.83	2.97429	0.297264		3.06375	0.094082		3.30251	0.069566		2.77228	0.011911		2.60962	0.011911		3.09898	0.029679
496	512	GFQPTNGVGYQPYRVVV	14	1880.97	2.86479	0.323725		2.96482	0.134728		3.43086	0.100417		1.00332	0.102436		0.972131	0.2328		1.55516	0.282337
503	510	VGYQPYRV	6	981.515	0.972249	0.099817		1.03038	0.014536		1.45255	0.057118		0.796859	0.101681		0.964958	0.019181		1.25474	0.041322
503	512	VGYQPYRVVV	8	1179.65	0.903948	0.097732		0.988633	0.041655		1.38094	0.066601		0.67586	0.071959		0.833268	0.021124		1.22689	0.120489
503	513	VGYQPYRVVVL	9	1292.74	0.660481	0.180127		0.721906	0.023573		0.995474	0.141657		0.39328	0.100458		0.633262	0.167966		0.85865	0.035921
514	533	SFELLHAPATVCGPKKSTNL	17	2113.11	3.14855	0.053244		3.5248	0.146168		3.54039	0.055506		3.10987	0.42617		3.28672	0.114102		3.59328	0.081903
515	533	FELLHAPATVCGPKKSTNL	16	2026.08	3.37745	0.458253		3.21414	0.124062		3.25934	0.06096		2.48748	0.013706		2.90105	0.013706		3.25784	0.092916
516	532	ELLHAPATVCGPKKSTN	14	1765.93	2.96077	0.433595		2.78506	0.025983		2.88355	0.025983		2.93758	0.025983		2.65426	0.025983		3.04274	0.037262
517	533	LLHAPATVCGPKKSTNL	14	1749.97	2.4048	0.142055		2.56867	0.166572		2.56536	0.08806		2.65443	0.042417		2.36208	0.085733		2.67758	0.060323
518	532	LHAPATVCGPKKSTN	12	1523.8	2.45733	0.31229		2.63172	0.07251		2.41667	0.048759		2.17264	0.207311		2.09068	0.027036		2.52615	0.027036
518	533	LHAPATVCGPKKSTNL	13	1636.88	2.07087	0.058585		2.01756	0.028673		2.09091	0.163731		1.42791	0.028673		1.71306	0.028673		1.96281	0.047319
519	533	HAPATVCGPKKSTNL	12	1523.8	3.10319	0.458857		3.01729	0.133882		3.0918	0.071149		2.77822	0.278127		3.02577	0.042481		3.2781	0.071728
523	533	TVCGPKKSTNL	9	1147.61	2.0039	0.273771		2.0334	0.036921		2.21429	0.066263		1.76102	0.126962		1.88353	0.115599		1.83028	0.03113
534	541	VKNKCVNF	7	951.508	1.39569	0.056265		1.5786	0.03342		1.70621	0.092549		1.68433	0.033357		1.5439	0.037845		1.68525	0.041762
542	552	NFNGLTGTGVL	10	1092.57	2.25615	0.372052		2.17366	0.303759		2.24225	0.294209		2.34843	0.293071		2.08007	0.295597		2.329	0.294677
544	552	NGLTGTGVL	8	831.457	2.20122	0.228959		2.17184	0.070879		2.21721	0.033143		1.96227	0.219772		1.99725	0.036645		2.18525	0.043285
546	552	LTGTGVL	6	660.393	1.85141	0.156685		1.85379	0.044032		1.92116	0.020912		1.75106	0.148596		1.80426	0.036011		1.9266	0.02397
553	565	TESNKKFLPFQQF	11	1613.83	2.85828	0.326602		2.97698	0.11348		3.00348	0.111321		2.71671	0.380108		2.74522	0.099793		3.00404	0.103035
553	568	TESNKKFLPFQQFGRD	14	1941.98	3.14464	0.376136		3.39846	0.024168		3.36882	0.024168		3.09828	0.347502		3.23003	0.070364		3.52691	0.029377
555	568	SNKKFLPFQQFGRD	12	1711.89	2.84938	0.385934					3.01461	0.048357		3.28402	0.143707		2.98071	0.100399		3.28631	0.144252
567	583	RDIADTTDAVRDPQTLE	15	1915.94	1.95849	0.016198		2.78643	0.120557		2.882	0.049265		2.00232	0.353429		2.66089	0.102875		2.98542	0.016198
569	575	IADTTDA	6	706.325	1.29482	0.179726		1.3191	0.03971		1.33734	0.038351		1.35653	0.105157		1.43432	0.028423		1.57371	0.021885
569	583	IADTTDAVRDPQTLE	13	1644.81	4.4787	0.092404		4.73709	0.17325		4.81613	0.041745		4.4269	0.352129		4.76579	0.049233		5.04466	0.082687
575	582	AVRDPQTL	6	899.495	2.12748	0.152853		2.22636	0.068836		2.26476	0.02195		2.28881	0.015795		2.12073	0.033392		2.29988	0.027489
575	583	AVRDPQTLE	7	1028.54	2.75816	0.063467		2.96006	0.02971		3.11567	0.009838		3.12782	0.004989		2.969	0.020569		3.21823	0.019535
575	584	AVRDPQTLEI	8	1141.62	3.17112	0.223817		3.18064	0.065855		3.3193	0.022494		3.6472	0.002568		4.09741	0.066171		3.97981	0.231975
576	582	VRDPQTL	5	828.457	1.65673	0.124282		1.72433	0.037754		1.75759	0.013183		1.60485	0.135755		1.63379	0.021812		1.71528	0.021808
576	583	VRDPQTLE	6	957.5	2.49509	0.158939		2.52446	0.04651		2.60803	0.048097		2.40806	0.170991		2.44738	0.043724		2.6819	0.031827

## Sheet: Table S3 
Table S3: Comparison of deuterium exchange of peptides common to RBD(isolated) and RBD(Spike) in free and ACE2-bound states at indicated labeling times
						RBD(isolated)					RBD(islolated):ACE2 complex					RBD(Spike)					RBD(Spike):ACE2 complex					Difference of RBD(isolated)-RBD(Spike)			Difference of ACE2:RBD(isolated)-ACE2:RBD(Spike)
						1 min		10 min			1 min		10 min			1 min		10 min			1 min		10 min			1 min	10 min		1 min	10 min
Start	End	Sequence	Max Uptake	MHP		Uptake	SD	Uptake	SD		Uptake	SD	Uptake	SD		Uptake	SD	Uptake	SD		Uptake	SD	Uptake	SD
324	334	ESIVRFPNITN	9	1289.68		1.00891	0.115427	1.59916	0.082468		1.02745	0.12081	1.51287	0.05985		1.10962	0.212551	1.63322	0.228003		1.2959	0.093399	1.74946	0.043073		-0.100716	-0.03406		-0.26845	-0.236591
351	361	YAWNRKRISNC	10	1410.71		1.09038	0.268595	1.55688	0.107618		0.79736	0.016471	1.43697	0.078515		1.25892	0.069196	1.79144	0.096143		1.2091	0.102647	1.62959	0.057776		-0.168543	-0.234558		-0.411744	-0.19262
375	387	STFKCYGVSPTKL	11	1430.73		2.86298	0.168092	3.14661	0.088269		3.10256	0.112492	3.31031	0.109475		3.75056	0.063607	4.05428	0.028046		3.5776	0.052948	4.09923	0.039528		-0.887587	-0.907671		-0.475044	-0.78892
377	387	FKCYGVSPTKL	9	1242.66		2.81738	0.149302	2.95883	0.096508		2.52879	0.230987	2.79576	0.203489		3.14837	0.087862	3.47209	0.085411		3.22283	0.131809	3.48853	0.091347		-0.330983	-0.513263		-0.694038	-0.692762
378	387	KCYGVSPTKL	8	1095.59		2.3988	0.253927	2.47789	0.103112		2.22056	0.430338	2.38034	0.068264		2.91791	0.035172	3.12902	0.040972		2.67524	0.111926	2.92743	0.017857		-0.519112	-0.651126		-0.454681	-0.547085
393	399	TNVYADS	6	769.336		0.391321	0.039009	1.06933	0.020113		0.424871	0.037146	0.973901	0.033192		0.29091	0.007076	0.854915	0.040961		0.391007	0.026953	0.778495	0.008579		0.100411	0.214411		0.033864	0.195406
393	400	TNVYADSF	7	916.405		0.328288	0.02804	0.790142	0.042454		0.254836	0.020356	0.582278	0.037777		0.289142	0.024854	0.77441	0.072148		0.316992	0.024503	0.498483	0.02521		0.039146	0.015732		-0.062156	0.083795
400	406	FVIRGDE	6	835.431		0.118603	0.081407	0.330619	0.003101		0.123787	0.007585	0.191646	0.029252		0.206238	0.023743	0.384174	0.016515		0.077889	0.013411	0.190853	0.009546		-0.087635	-0.053555		0.045898	0.000793
400	421	FVIRGDEVRQIAPGQTGKIADY	20	2433.29		2.08589	0.029191	3.92686	0.085878		2.38163	0.167699	3.38866	0.142659		2.49861	0.028656	3.93168	0.05916		2.06977	0.065906	3.23966	0.17465		-0.412722	-0.004814		0.311856	0.148997
401	420	VIRGDEVRQIAPGQTGKIAD	18	2123.16		2.49892	0.042811	4.18784	0.136166		2.63542	0.197965	3.74241	0.13343		2.79286	0.061628	4.31228	0.095426		2.57722	0.051947	3.65634	0.084971		-0.293945	-0.124442		0.058208	0.086069
401	421	VIRGDEVRQIAPGQTGKIADY	19	2286.22		2.93866	0.011091	4.01199	0.011091		2.47833	0.234588	3.7818	0.239847		2.67948	0.073721	4.29572	0.109899		2.614	0.18991	3.68477	0.088255		0.259185	-0.283727		-0.135661	0.097037
407	420	VRQIAPGQTGKIAD	12	1453.81		1.76392	0.224767	2.78199	0.067643		1.6291	0.193796	2.37732	0.078851		2.06206	0.045699	3.10253	0.030833		1.91263	0.108653	2.66421	0.054452		-0.29814	-0.320541		-0.283536	-0.286887
407	422	VRQIAPGQTGKIADYN	14	1730.92		1.79758	0.20506	2.86822	0.146591		1.53886	0.185016	2.45193	0.066528		2.11254	0.02465	3.36179	0.027127		2.01644	0.113567	2.83774	0.030349		-0.314961	-0.493569		-0.477575	-0.385803
412	420	PGQTGKIAD	7	886.463		1.3343	0.147824	1.81377	0.074585		1.19285	0.080939	1.6211	0.015516		1.42507	0.037478	2.06333	0.051315		1.28262	0.080613	1.75499	0.033093		-0.090772	-0.249561		-0.089768	-0.133882
421	429	YNYKLPDDF	7	1174.54		0.510976	0.054274	0.801252	0.02216		0.428888	0.050715	0.638216	0.041804		0.548176	0.020386	0.925383	0.019409		0.564715	0.037202	0.715628	0.021056		-0.0372	-0.124131		-0.135827	-0.077412
423	429	YKLPDDF	5	897.435		0.371965	0.006689	0.503345	0.02931		0.317615	0.047507	0.440328	0.02152		0.427328	0.020278	0.5703	0.02524		0.429165	0.026451	0.489703	0.02809		-0.055363	-0.066955		-0.11155	-0.049375
423	431	YKLPDDFTG	7	1055.5		0.735222	0.00692	0.784187	0.031288		0.56982	0.073108	0.664125	0.02564		0.680108	0.021283	0.812806	0.02214		0.636113	0.016376	0.721352	0.030515		0.055114	-0.028619		-0.066293	-0.057227
432	441	CVIAWNSNNL	9	1133.54		1.68186	0.20703	1.63933	0.056647		1.45117	0.163024	1.63929	0.043957		2.02606	0.01585	2.15117	0.00745		1.88618	0.071213	2.18335	0.029261		-0.344198	-0.511837		-0.435005	-0.544058
434	441	IAWNSNNL	7	931.463		1.58025	0.145339	1.56726	0.075642		1.30082	0.211496	1.42254	0.010914		1.91141	0.047822	1.98511	0.057476		1.81513	0.108463	2.01445	0.029587		-0.331159	-0.417851		-0.514312	-0.591911
442	449	DSKVGGNY	7	839.389		2.14463	0.226916	2.2126	0.042369		2.07981	0.17498	2.07581	0.026801		2.34611	0.014346	2.33907	0.037826		2.25065	0.077406	2.36107	0.036348		-0.201488	-0.126475		-0.170836	-0.28526
444	452	KVGGNYNYL	8	1027.52		2.28367	0.237597	2.65817	0.07095		2.10569	0.203755	2.47276	0.02581		2.56003	0.033709	2.94215	0.060778		2.20597	0.070382	2.61859	0.037962		-0.276358	-0.283975		-0.100277	-0.145827
456	467	FRKSNLKPFERD	10	1536.83		0.488132	0.019959	1.61406	0.063521		0.615092	0.04306	1.42601	0.086061		0.793066	0.046421	2.00323	0.073506		0.821511	0.066117	1.59238	0.020703		-0.304934	-0.389176		-0.206419	-0.166368
456	470	FRKSNLKPFERDIST	13	1837.99		1.97853	0.280687	3.39784	0.070607		2.17388	0.16629	3.12134	0.175743		2.27115	0.016865	3.39046	0.017651		2.15339	0.071239	3.08944	0.074999		-0.29262	0.007387		0.020495	0.031897
471	486	EIYQAGSTPCNGVEGF	14	1671.73		4.21082	0.023063	3.57697	0.141462		3.65196	0.023063	3.39422	0.048714		4.37115	0.117515	4.4163	0.115182		4.14433	0.213632	4.52806	0.011549		-0.16033	-0.839334		-0.492364	-1.13384
471	487	EIYQAGSTPCNGVEGFN	15	1785.77		3.95314	0.025664	4.26686	0.141582		3.36279	0.020429	3.90339	0.082077		4.91124	0.052254	4.93654	0.142176		4.62837	0.17118	4.98797	0.223757		-0.958098	-0.669683		-1.26558	-1.08458
472	486	IYQAGSTPCNGVEGF	13	1542.69		3.38925	0.062957	4.03785	0.013702		2.54765	0.013702	2.96026	0.058802		4.13278	0.118879	4.04159	0.107055		3.93317	0.221507	4.15531	0.12813		-0.743532	-0.003744		-1.38552	-1.19505
472	487	IYQAGSTPCNGVEGFN	14	1656.73		3.94478	0.062505	3.95823	0.187716		3.02508	0.020255	3.53485	0.082325		4.60575	0.00774	4.75145	0.081695		4.49466	0.209621	4.87813	0.119053		-0.660968	-0.793218		-1.46958	-1.34328
487	494	NCYFPLQS	6	971.429		1.46952	0.094943	2.14752	0.062486		1.3294	0.135909	1.84685	0.071639		1.6285	0.050797	2.29775	0.049157		1.44289	0.002158	2.02567	0.012172		-0.15898	-0.150226		-0.113487	-0.178824
487	495	NCYFPLQSY	7	1134.49		1.55918	0.100065	2.55324	0.065636		1.35068	0.1435	2.21875	0.096585		1.66021	0.022997	2.74684	0.070343		1.47628	0.032772	2.37913	0.053411		-0.101028	-0.193605		-0.125603	-0.160381
488	495	CYFPLQSY	6	1020.45		1.17658	0.058904	2.12764	0.019112		1.00909	0.126223	1.84599	0.111029		1.29582	0.044565	2.27694	0.03192		1.06999	0.047818	1.84958	0.063299		-0.119241	-0.149294		-0.060899	-0.003591
488	502	CYFPLQSYGFQPTNG	12	1721.76		3.07016	0.264043	4.05834	0.094994		2.59338	0.175911	3.40034	0.166904		2.99542	0.092747	4.09286	0.076477		2.69139	0.099318	3.68489	0.023367		0.074742	-0.034514		-0.098013	-0.284553
491	510	PLQSYGFQPTNGVGYQPYRV	16	2271.12		4.00673	0.046724	5.13444	0.105936		3.41399	0.00984	4.32378	0.150095		4.86868	0.051918	5.40417	0.06705		4.11834	0.138831	5.16835	0.052266		-0.861943	-0.269727		-0.704347	-0.844564
491	512	PLQSYGFQPTNGVGYQPYRVVV	18	2469.26		3.76633	0.004839	4.98395	0.117989		3.40674	0.004839	4.14917	0.042049		4.67508	0.049907	5.25	0.038521		4.07317	0.090131	4.95514	0.023201		-0.908757	-0.266053		-0.66642	-0.805967
495	512	YGFQPTNGVGYQPYRVVV	15	2044.03		3.07725	0.379353	3.19472	0.155588		2.26765	0.01938	2.83507	0.07206		3.58966	0.096591	3.804	0.039645		3.03514	0.131137	3.56503	0.032654		-0.51241	-0.609287		-0.767497	-0.729962
495	513	YGFQPTNGVGYQPYRVVVL	16	2157.11		3.20137	0.39784	3.22554	0.061394		3.1814	0.014452	3.02353	0.064961		3.84057	0.128071	4.41955	0.052593		3.30286	0.065931	4.24188	0.07467		-0.639208	-1.19401		-0.121463	-1.21835
496	510	GFQPTNGVGYQPYRV	12	1682.83		2.97429	0.297264	3.06375	0.094082		2.77228	0.011911	2.60962	0.011911		3.41535	0.031191	3.52383	0.044214		2.79717	0.161528	3.33289	0.04803		-0.441056	-0.460078		-0.024897	-0.723276
503	510	VGYQPYRV	6	981.515		0.972249	0.099817	1.03038	0.014536		0.796859	0.101681	0.964958	0.019181		1.07072	0.04195	1.13163	0.021071		0.718551	0.039557	0.940613	0.016		-0.098475	-0.101249		0.078308	0.024345
514	533	SFELLHAPATVCGPKKSTNL	17	2113.11		3.14855	0.053244	3.5248	0.146168		3.10987	0.42617	3.28672	0.114102		3.95865	0.078178	4.41835	0.010787		3.86468	0.190561	4.42995	0.170936		-0.810096	-0.89355		-0.754813	-1.14323
515	533	FELLHAPATVCGPKKSTNL	16	2026.08		3.37745	0.458253	3.21414	0.124062		2.48748	0.013706	2.90105	0.013706		3.49879	0.080018	3.93332	0.063459		3.53262	0.177246	4.08753	0.073692		-0.121342	-0.719186		-1.04514	-1.18648
517	533	LLHAPATVCGPKKSTNL	14	1749.97		2.4048	0.142055	2.56867	0.166572		2.65443	0.042417	2.36208	0.085733		2.92306	0.17156	3.28102	0.077707		2.98381	0.212275	3.45014	0.150818		-0.518258	-0.712347		-0.32938	-1.08806
518	533	LHAPATVCGPKKSTNL	13	1636.88		2.07087	0.058585	2.01756	0.028673		1.42791	0.028673	1.71306	0.028673		2.78308	0.215721	3.21818	0.144879		2.87896	0.177705	3.27285	0.122853		-0.712206	-1.20061		-1.45105	-1.55979
534	541	VKNKCVNF	7	951.508		1.39569	0.056265	1.5786	0.03342		1.68433	0.033357	1.5439	0.037845		0.840674	0.012701	1.80912	0.008813		0.939233	0.004919	1.6927	0.013646		0.555012	-0.230522		0.745096	-0.148804
542	552	NFNGLTGTGVL	10	1092.57		2.25615	0.372052	2.17366	0.303759		2.34843	0.293071	2.08007	0.295597		1.63864	0.065783	3.01654	0.085988		1.91157	0.100479	3.11592	0.014607		0.61751	-0.842884		0.43686	-1.03584
544	552	NGLTGTGVL	8	831.457		2.20122	0.228959	2.17184	0.070879		1.96227	0.219772	1.99725	0.036645		1.14645	0.02794	2.40893	0.058173		1.3916	0.08687	2.41846	0.041229		1.05476	-0.237088		0.570676	-0.421208
546	552	LTGTGVL	6	660.393		1.85141	0.156685	1.85379	0.044032		1.75106	0.148596	1.80426	0.036011		0.996833	0.012777	1.97769	0.017442		1.20539	0.048397	1.93162	0.034573		0.854578	-0.123902		0.545668	-0.127363

## Sheet: Table S4 
	Table S4: Deuterium exchange at indicated labeling times for free ACE2 and its complexes with RBDisolated and S protein
					ACE2							RBD(isolated):ACE2							Spike:ACE2
					1 min		10 min		100 min			1 min		10 min		100 min			1 min		10 min
Start	End	Sequence	MaxUptake	MHP	Uptake	Uptake SD	Uptake	Uptake SD	Uptake	Uptake SD		Uptake	Uptake SD	Uptake	Uptake SD	Uptake	Uptake SD		Uptake	Uptake SD	Uptake	Uptake SD
21	29	IEEQAKTFL	8	1078.58	1.88419	0.068621	2.38544	0.118871	2.51701	0.066158		0.996615	0.125727	1.37335	0.066408	1.93782	0.087823		1.35543	0.121722	1.79761	0.121859
28	40	FLDKFNHEAEDLF	12	1624.76	1.81485	0.023058	1.9966	0.034552	2.3995	0.130879		1.04446	0.128046	1.47381	0.036058	1.88752	0.038605		1.48093	0.000273	2.22912	0.121083
30	39	DKFNHEAEDL	9	1217.54	1.08259	0.066579	1.25131	0.073511	1.39782	0.114064		0.447863	0.11672	0.764002	0.002079	1.03166	0.019305		0.844528	0.051475	1.26259	0.01977
30	40	DKFNHEAEDLF	10	1364.61	1.45052	0.075581	1.64639	0.109215	2.00196	0.207873		0.695801	0.048216	1.09386	0.05497	1.31419	0.041763		0.998978	0.066829	1.57586	0.047196
58	71	NVQNMNNAGDKWSA	13	1548.69	3.21556	0.086389	3.65566	0.188831	3.65373	0.092978		1.82986	0.288064	2.32362	0.066514	2.76223	0.126242		2.89283	0.073139	3.71867	0.081992
58	73	NVQNMNNAGDKWSAFL	15	1808.84	3.38291	0.05631	4.05638	0.17835	4.28364	0.023321		2.06261	0.351181	2.80559	0.063836	3.51681	0.099729		3.43755	0.120278	4.49631	0.084302
63	72	NNAGDKWSAF	9	1109.5	1.59074	0.072718	2.22153	0.077312	2.4394	0.035323		1.32574	0	1.44373	0.192642	1.91864	0.171806
66	72	GDKWSAF	6	810.378	1.25054	0.028613	1.45673	0.054741	1.49488	0.026964		0.823702	0.055823	1.10667	0.012736	1.1821	0.069825		1.62382	0.014661	1.62154	0.070569
72	79	FLKEQSTL	7	965.53	1.02754	0.041488	1.52385	0.102916	1.61695	0.041309		0.565228	0.120105	0.83123	0.031067	1.29364	0.03346		0.763027	0.085746	1.23852	0.024419
73	79	LKEQSTL	6	818.462	1.12803	0.06001	1.51504	0.098021	1.70741	0.105464		0.623566	0.132245	0.913726	0.007705	1.33368	0.02868		0.877695	0.030583	1.2621	0.031524
75	92	EQSTLAQMYPLQEIQNLT	16	2107.04	6.13232	0.038555	6.97566	0.142355	7.78522	0.025945		3.83226	0.413172	4.64651	0.091621	5.88131	0.10686		5.1065	0.19831	6.51821	0.118787
80	86	AQMYPLQ	5	850.413	1.5052	0.054094	1.63623	0.025542	1.79844	0.03974		0.829878	0.145591	0.898815	0.008384	1.24288	0.02		1.11603	0.035842	1.29669	0.037302
80	87	AQMYPLQE	6	979.455	1.69203	0.054423	1.84851	0.077572	1.94417	0.047678		1.04276	0.176053	1.14518	0.021576	1.49211	0.027781		1.26697	0.062063	1.48262	0.012332
109	120	SEDKSKRLNTIL	11	1403.79	1.61104	0.097865	1.86867	0.133145	2.18193	0.261043		1.30465	0.001102	1.54409	0.101121	2.03204	0.13949		1.68716	0.088716	2.25565	0.053322
112	124	KSKRLNTILNTMS	12	1505.85	1.2324	0.141602	1.38363	0.161132	1.36446	0.153862		0.334454	0.113215	0.880744	0.190764	1.15779	0.157248		1.40065	0.236941	1.62008	0.153463
122	146	TMSTIYSTGKVCNPDNPQECLLLEP	21	2753.28	6.07448	0.077572	6.82202	0.332711	7.31277	0.23666		2.70985	0.094993	3.73241	0.112693	4.6339	0.056172
126	140	IYSTGKVCNPDNPQE	12	1664.76	2.27771	0.151597	2.53519	0.233903	2.75766	0.121742		1.04724	2.27374e-13	1.70091	0.112843	2.18929	0.153609		2.25288	0.1109	2.68569	0.096901
126	141	IYSTGKVCNPDNPQEC	13	1767.77	2.78983	0.047906	2.73015	0.048637	3.0722	0.145838		1.62796	0.256559	2.02325	0.143005	2.55922	0.283283		2.53775	0.138523	3.06076	0.107367
142	148	LLLEPGL	5	754.471	0.811828	0.056528	1.12472	0.090678	1.36366	0.081496		0.496116	0.137972	0.78212	0.085079	1.17033	0.115233		0.843921	0.04505	1.20966	0.051652
143	149	LLEPGLN	5	755.43	0.791603	0.073312	1.04579	0.104636	1.27779	0.079432		0.44006	0.123926	0.711561	0.036627	1.02446	0.07396		0.769368	0.024774	1.08167	0.023015
143	150	LLEPGLNE	6	884.472	0.932891	0.059669	1.20256	0.114998	1.42079	0.091706		0.503091	0.143362	0.749822	0.024101	1.07664	0.046401		0.86895	0.027392	1.19105	0.010979
149	156	NEIMANSL	7	891.424	1.49696	0.075741	1.73643	0.095208	1.95859	0.099632		0.938419	0.209725	1.11956	0.069289	1.51915	0.056085		1.58436	0.159415	1.72339	0
150	156	EIMANSL	6	777.381	1.11198	0.052229	1.23761	0.100985	1.18803	0.040936		0.872431	0	0.844005	0.081359	1.00122	0.056604		0.976483	0.046728	1.29035	0.047097
153	162	ANSLDYNERL	9	1194.57	1.7711	0.130702	1.79477	0.13592	1.71405	0.083451		0.84313	0	1.19031	0.071924	1.36386	0.067924		1.24096	0.04954	1.51136	0
154	166	NSLDYNERLWAWE	12	1695.78	2.91401	0.063303	3.38184	0.188343	3.5262	0.062296		1.74771	0.418622	2.17577	0.0553				1.48216	0.153837	1.69949	0.162434
155	165	SLDYNERLWAW	10	1452.69	0.80233	0.046224	1.10122	0.1794	1.40521	0.088971		0.572136	0.08765	0.792402	0.065361	1.33305	0.104943		2.91778	0.347386	3.61382	0.209564
168	182	WRSEVGKQLRPLYEE	13	1889.99	1.6727	0.13997	2.13564	0.129982	2.77941	0.211184		0.924734	0.240835	1.66847	0.087299	2.55123	0.024392		1.22476	0.070671	1.73646	0.106562
168	183	WRSEVGKQLRPLYEEY	14	2053.05	1.98762	0.203825	2.52699	0.174517	2.97648	0.176498		1.37611	0	1.98452	0.144226				1.91941	2.27374e-13	2.52555	0.054407
169	180	RSEVGKQLRPLY	10	1445.82	1.31584	0.113654	1.69117	0.127411	1.96901	0.151995		0.966685	0	1.2672	0.057657	1.81032	0.108009		2.11462	0.030061	2.72524	0.256188
169	182	RSEVGKQLRPLYEE	12	1703.91	1.72506	0.153011	2.00196	0.162889	2.29498	0.187672		0.95724	0.104092	1.45467	0.068852	2.21516	0.112372		1.45024	0.044338	1.98198	0.083595
184	191	VVLKNEMA	7	903.497	0.800957	0.01443	0.835016	0.015591	0.847034	0.125361		0.566799	0.063143	0.622779	0.103913	0.932511	0.03		1.6408	0.034218	2.22226	0.062056
184	198	VVLKNEMARANHYED	14	1788.87	1.5059	0.083	2.03177	0.119354	2.40666	0.151743		0.691429	0.023099	1.5738	0	2.19077	0.065956		1.35457	0.015324	1.23975	0.044191
184	201	VVLKNEMARANHYEDYGD	17	2123.98	1.96697	0.085144	2.34015	0.118357	3.14601	0.389979		1.48669	0.148195	1.96105	0.128432	2.69436	0.094794		1.76263	0.08288	2.59371	0.031074
184	202	VVLKNEMARANHYEDYGDY	18	2287.04	1.8678	0.081474	2.28717	0.126407	2.7573	0.305775		1.43223	0	1.77315	0.119732	2.49812	0.155971		1.96055	0.021797	2.75809	0.097086
186	201	LKNEMARANHYEDYGD	15	1925.84	1.262	0.178889	1.68892	0.213111	1.87263	0.016705		1.4909	0.320597	1.59266	0.094399	2.59543	0.217621		1.90005	0.106323	2.58291	0.12191
187	201	KNEMARANHYEDYGD	14	1812.76	1.36427	0.04123	1.77728	0.116945	2.19234	0.23474		1.01441	2.27374e-13	1.46032	0.123427	2.10345	0.154534		1.69545	0.035423	2.3172	0.100189
187	202	KNEMARANHYEDYGDY	15	1975.82	1.41673	0.038649	1.762	0.09	2.74317	0.038649		0.917302	0.124868	1.26088	0.062413	1.81484	0.14286		1.58369	0.054816	2.0665	2.27374e-13
191	201	ARANHYEDYGD	10	1310.54	0.696829	0.019569	0.859981	0.089515	1.05219	0.028787		0.54117	0.049433	0.722991	0.049237	0.919602	0.04		0.851462	0.037402	1.14647	0.030594
202	216	YWRGDYEVNGVDGYD	14	1807.76	2.26724	0.14501	2.20585	0.170434	2.23294	0.140907		1.70776	0.22016	1.68313	0.15717	1.79751	0.162604		2.39779	0.147314	2.5318	0.045281
203	216	WRGDYEVNGVDGYD	13	1644.69	2.24603	0.073624	2.01138	0.173469	2.02917	0.098563		1.50775	0.173893	1.48469	0.132566	1.56115	0		2.13642	0.096338	2.39489	0.089044
208	216	EVNGVDGYD	8	967.4	1.31882	0.100697	1.26665	0.104779	1.29527	0.185538		0.770466	0.204858	0.80594	0.039941	0.911056	0.056613		1.26241	0.056495	1.40214	0.04269
217	224	YSRGQLIE	7	965.505	1.15751	0.063722	1.86661	0.099282	2.12277	0.136298		0.714598	0.120863	1.31371	0.033307	1.76225	0.042665		1.09527	0.030081	1.72593	0.024424
223	230	IEDVEHTF	7	989.457	0.429046	0.018416	0.573364	0.07058	0.50925	0.134614		0.193224	0.014101	0.394166	0.137037	0.377305	0.062866		0.375691	0.107011	0.440642	0.104984
223	231	IEDVEHTFE	8	1118.5	0.560537	0.033499	0.586467	0.03509	0.755074	0.071507		0.35306	0.03122	0.432838	0.030049	0.671556	0.04778		0.573075	0.012564	0.650892	0.018825
224	230	EDVEHTF	6	876.373	0.473578	0.037141	0.512053	0.069002	0.59929	0.052973		0.395826	0.061444	0.334408	0.063765	0.503104	0.030153		0.485491	0.003213	0.529269	0.018246
224	231	EDVEHTFE	7	1005.42	0.528095	0.03966	0.563805	0.043065	0.687609	0.045274		0.342866	0.035454	0.391641	0.027439	0.624525	0.016962		0.596103	0.016015	0.671578	0.011826
225	231	DVEHTFE	6	876.373	0.468184	0.037214	0.535347	0.047855	0.721068	0.075512		0.343871	0.079091	0.318816	0.046966	0.62333	0.034883		0.577526	0.029387	0.672022	0.001585
232	238	EIKPLYE	5	891.482	0.678451	0.058558	0.790235	0.065034	0.967238	0.061478		0.501606	0.008349	0.67294	0.043675	0.981596	0.04857		0.809316	0.026364	0.874679	0.011669
232	240	EIKPLYEHL	7	1141.63	0.570656	0.042493	0.655226	0.064362	0.730773	0.07409		0.339992	0.065313	0.486147	0.027837	0.668203	0.032885		0.613228	0.022417	0.731795	0.012189
232	242	EIKPLYEHLHA	9	1349.72	0.59391	0.025078	0.668845	0.036063	0.740778	0.082769		0.435847	0.069461	0.507148	0.014301	0.681318	0.01		0.621204	0.025622	0.763704	0.016399
235	242	PLYEHLHA	6	979.5	0.275864	0.014867	0.286357	0.023168	0.316243	0.026364		0.243192	0	0.259379	0.007967	0.368316	0.01642		0.359019	0.004922	0.432861	0.011977
236	242	LYEHLHA	6	882.447	0.289341	0.00318	0.363641	0.008065	0.441773	0.110033		0.105209	0	0.177546	0.015223	0.213254	0.012476		0.6488	0.042824	0.552624	0.024875
241	248	HAYVRAKL	7	957.563	0.511092	0.052893	0.619771	0.055882	0.557794	0.072288		0.404586	0.055492	0.600991	0.050192	0.691935	0.072784		0.630159	0.10493	0.926838	0.052815
243	251	YVRAKLMNA	8	1065.59	0.997119	0.284746	1.14933	0.288484	1.13812	0.241799		0.656892	0.246339	0.785704	0.182778	1.02517	0.219944		1.10644	0.167698	1.44428	0.160533
247	255	KLMNAYPSY	7	1086.53	1.25862	0.076378	1.30443	0.143434	1.42089	0.041324		0.708259	0	0.923963	0.085473	1.12334	0.095538		1.36679	0.05536	1.544	0.082976
249	255	MNAYPSY	5	845.35	0.953031	0.091473	0.962662	0.090289	0.984239	0.070997		0.592788	0.175287	0.60355	0.061171	0.751281	0.078357		0.960774	0.047853	1.06679	0.056314
249	262	MNAYPSYISPIGCL	11	1528.72	2.05911	0.164243	2.97059	0.222875	3.08896	0.219106		1.37591	0.266509	2.19038	0.140312	2.31827	0.058466		2.15933	0.059692	3.15055	0.08292
249	266	MNAYPSYISPIGCLPAHL	14	1946.95	2.1697	0.097571	3.10925	0.239237	2.97616	0.096896		1.21491	0	2.0887	0	2.55588	0.088614		2.18604	0.008789	3.1381	0.178031
256	262	ISPIGCL	5	702.385	0.596039	0.061397	1.11204	0.092798	1.19405	0.057442		0.345025	0.035877	0.782921	0.036261	0.940664	0.079587		0.697924	0.02007	1.2179	0.009613
256	270	ISPIGCLPAHLLGDM	12	1536.79	1.13975	0.058225	1.5282	0.117298	1.52587	0.090772		0.659924	0.093757	1.03991	0.075331	1.27456	0.029871		1.04313	0.051568	1.58152	0.07516
257	266	SPIGCLPAHL	7	1007.53	0.775486	0.043508	1.28546	0.053811	1.27507	0.03607		0.54663	0.039077	0.997776	0.060522	1.16111	0.116757		0.924617	0.006746	1.45195	0.08647
258	266	PIGCLPAHL	6	920.502	0.618647	0.046941	1.06033	0.054285	0.982589	0.061078		0.415225	0.029459	0.783021	0.043908	0.863789	0.00564		0.700388	0.018815	1.15129	0.035268
259	266	IGCLPAHL	6	823.449	0.593338	0.031208	1.02003	0.071958	1.01752	0.057181		0.439933	0.017132	0.771566	0.047943	0.896434	0.082837		0.671217	0.042335	1.13271	0.024843
260	266	GCLPAHL	5	710.365	0.511805	0.063339	0.861504	0.088922	0.842091	0.081763		0.366578	0.025477	0.597271	0.052515	0.689158	0.064489		0.62093	0.008558	1.0107	0.025274
263	270	PAHLLGDM	6	853.424	0.407173	0.137644	0.508115	0.143901	0.5998	0.137952		0.274912	0	0.271265	0.001323	0.443612	0.060466		0.497156	0.009722	0.725638	0.030823
279	291	YSLTVPFGQKPNI	10	1463.79	2.85773	0.19867	3.43359	0.318105	3.3874	0.171089		1.4494	0	2.3664	0.129279	2.69057	0.212938		2.76776	0.145516	3.44145	0.093954
279	292	YSLTVPFGQKPNID	11	1578.82	3.26697	0.191749	3.84013	0.290165	3.82624	0.156756		2.34142	0.207883	2.42954	0.220313	2.92956	0.31358		2.90184	0.147302	3.731	0.10226
296	302	AMVDQAW	6	820.366	1.12089	0.044112	1.53011	0.099066	1.75623	0.199267		1.95508	0.072657	1.95387	0.054666	2.29805	0.096783		1.14595	0.053287	1.58447	0.06987
297	304	MVDQAWDA	7	935.393	1.16678	0.056368	1.41843	0.089194	1.707	0.083256		0.829314	0.1879	1.02088	0.0684	1.33822	0.058343		1.10472	0.050865	1.37937	0.080571
298	304	VDQAWDA	6	804.352	1.01603	0.045003	1.22221	0.096071	1.47693	0.072456		0.66905	0.172835	0.835036	0.056335	1.21211	0.072137		0.953778	0.043182	1.21767	0.07988
302	314	WDAQRIFKEAEKF	12	1667.85	2.3967	0.179783	2.63524	0.185834	2.72396	0.26634		1.53591	0.114907	1.84501	0.019077	2.3706	0.083154		2.4565	0.126355	2.79397	0.075851
304	314	AQRIFKEAEKF	10	1366.75	1.49396	0.26578	1.73153	0.273805	1.83238	0.320226		0.974901	0.241393	1.31627	0.185603	1.74087	0.169467		1.24013	0.549718	1.46837	0.6181
305	314	QRIFKEAEKF	9	1295.71	1.27652	0.353388	1.4896	0.344392	1.31025	0.326842		0.51532	0.273468	0.68479	0.240441	0.881052	0.221157		1.16891	0.230333	1.39408	0.250446
318	329	VGLPNMTQGFWE	10	1378.65	0.797984	0.106084	0.893261	0.122792	1.37435	0.110871		1.91427	0	2.1814	0.166884	2.24406	0.029847		0.76879	0.244132	1.40078	0.210343
342	355	AVCHPTAWDLGKGD	12	1469.68	1.23826	0.125638	1.97928	0.106699	2.11656	0.110858		0.831899	0.112014	1.48018	0.077017	1.77422	0.076571		1.24046	0	2.13492	0.049965
345	356	HPTAWDLGKGDF	10	1343.64	1.04905	0.182763	1.26162	0.10744	1.98307	0.097641		0.372443	0.15306	0.626553	0.067278	0.946131	0.05		1.28138	0	1.56952	0.089886
361	369	CTKVTMDDF	8	1059.45	0.741062	0.133148	0.926953	0.130704	1.11385	0.161294		0.308067	0.049529	0.525453	0.000334	0.980151	0.121472		0.892457	0.18554	1.10967	0.038711
363	369	KVTMDDF	6	855.392	0.402447	0.046167	0.434743	0.043948	0.539396	0.068118									0.378613	0.00254	0.47042	0.047941
368	381	DFLTAHHEMGHIQY	13	1698.77	0.43827	0.0661	0.686688	0.10286	1.02288	0.069495		0.368276	0	0.412031	0.001361	0.750633	0.010293		0.562679	0.030492	0.891048	0.125305
369	384	FLTAHHEMGHIQYDMA	15	1900.85	0.489023	0.047188	0.603616	0.068697	0.639214	0.093125		0.242725	0.015869	0.396475	0.024669	0.583988	0.052027
370	381	LTAHHEMGHIQY	11	1436.67	0.278264	0.013363	0.334814	0.025133	0.308526	0.022836		0.041052	0.164644	0.373489	0.5321	0.118344	0.152618		0.199598	0.352324	0.212375	0.110145
371	381	TAHHEMGHIQY	10	1323.59	0.339677	0.051151	0.413236	0.046146	0.395261	0.044435		0.213785	0.014652	0.349899	0.039128	0.403255	0.047797		0.797283	0.330599	0.495774	0.025683
371	384	TAHHEMGHIQYDMA	13	1640.69	0.543418	0.049401	0.563689	0.047651	0.407	0.081627		0.265671	0.045525	0.481277	0.037455	0.531373	0.053958		0.560221	0.060146	0.727528	0.054085
385	391	YAAQPFL	5	809.419	1.08629	0.022446	1.38268	0.061295	1.50575	0.067162		0.484452	0.09635	0.817774	0.045169	1.13853	0.063093		0.751449	0.133389	1.22297	0.02989
392	400	LRNGANEGF	8	977.48	0.840304	0.055748	0.939064	0.071883	1.08706	0.046481		0.543099	0.124032	0.63047	0.028576	0.807262	0.002767		1.00947	0.043586	1.17167	0.052385
392	406	LRNGANEGFHEAVGE	14	1599.75	1.22431	0.128304	1.53275	0.153069	2.12916	0.377046				0.94261	0.048708	1.56984	0.139223		1.49828	0.093113	2.0985	0.133378
401	410	HEAVGEIMSL	9	1085.53	0.776752	0.069375	1.12588	0.072809	1.58502	0.089733		0.604392	0.094459	0.919052	0.082179	1.38932	0.071383
403	410	AVGEIMSL	7	819.428	0.806453	0.154517	1.0458	0.099208	1.22922	0.127724		0.496563	0.130628	0.648306	0.094018	1.00162	0.061791		0.817267	0.081229	1.14924	0.009133
404	420	VGEIMSLSAATPKHLKS	15	1768.96	2.61154	0.198066	2.95796	0.228053	3.10252	0.146104		1.88592	0.37603	2.13077	0.147275	2.72688	0.188913		2.7418	0.168108	3.28406	0.11589
404	421	VGEIMSLSAATPKHLKSI	16	1882.05	1.27343	0.04146	1.76654	0.187793	2.148	0.055971		0.687121	0.00829	1.25422	0.150387	1.8609	0.158348		1.52393	0.078311	1.91864	0
409	428	SLSAATPKHLKSIGLLSPDF	17	2082.16	1.62182	0.106249	2.16227	0.204119	2.50422	0.113053		0.525347	0	1.51366	0	2.2338	0.213672		1.81176	0.114945	2.42278	0.154311
411	422	SAATPKHLKSIG	10	1209.69	0.973524	0.179146	1.04663	0.185456	1.2028	0.150968		0.643114	0.10537	0.768744	0.113979	1.0622	0.132623		1.07118	0.183124	1.24778	0.178543
411	423	SAATPKHLKSIGL	11	1322.78	0.886455	0.060762	1.04466	0.100784	1.43297	0.17426		0.817224	0.120962	1.01151	0	1.00848	0.211685		1.40513	0.076832	2.00094	0.291066
412	425	AATPKHLKSIGLLS	12	1435.86	1.29803	0.091205	1.6042	0.18686	1.96827	0.064539		0.712855	0.171764	0.982806	0.055992	1.63396	0.154748		1.16061	0.09258	1.74847	0.159647
421	428	IGLLSPDF	6	861.472	0.859939	0.08301	1.14481	0.116329	1.29665	0.086763		0.527715	0.132112	0.757526	0.078717	1.00244	0.110111		0.923552	0.035228	1.24274	0.05093
437	449	NFLLKQALTIVGT	12	1417.84	0.941642	0.087876	1.30126	0.158256	1.58523	0.068492		0.587755	0.186584	0.901951	0.10142	1.31769	0.122754		1.59949	0.260353	1.7456	0.44095
439	445	LLKQALT	6	786.508	0.29727	0.05624	0.455225	0.064069	0.76487	0.087028		0.054155	0.01004	0.184995	0.018929	0.744521	0.037855		0.3044	0.027222	0.440775	0.026853
445	453	TIVGTLPFT	7	948.54	0.427942	0.061893	0.577072	0.060154	0.476429	0.101983		0.241109	0.06735	0.387791	0.009337	0.549616	0.005516		1.5218	0.069445	1.64694	0.022822
445	455	TIVGTLPFTYM	9	1242.64	0.591316	0.127622	0.861977	0.132837	0.81184	0.14863		0.196903	0.036737	0.470711	0.022036	0.760066	0.024828		0.754636	0.027521	1.08501	0.047811
446	455	IVGTLPFTYM	8	1141.6	0.420277	0.08737	0.586657	0.089178	0.541144	0.12327		0.175046	0.058264	0.375012	0.057418	0.604127	0.061838		0.535224	0.052345	0.812072	0.053978
450	462	LPFTYMLEKWRWM	11	1800.9	1.58669	0.129345	2.54645	0.114656	2.94215	0.128297		1.35345	0	2.04851	0.019711	2.61612	0.076587		1.73621	0.056203	3.0829	0.031805
454	461	YMLEKWRW	7	1211.6	0.166366	0.067653	0.213094	0.088622	0.202923	0.109137		0.057698	0.00631	0.068117	0.015659	0.143029	0.026078		0.14702	0.031445	0.238345	0.037072
456	476	LEKWRWMVFKGEIPKDQWMKK	19	2763.46	1.54252	0.157452	2.65866	0.127003	3.23994	0.504824		0.867135	0.45952	1.91043	0.40309	2.73444	0.076074		1.5636	0.174173	2.93868	0.259478
465	473	KGEIPKDQW	7	1100.57	1.03091	0.088799	1.16536	0.078429	1.48458	0.07904		0.76561	0	0.964513	0.053247	1.37959	0.132793		1.10351	0.027299	1.48659	0.040126
465	480	KGEIPKDQWMKKWWEM	14	2120.05	1.55719	0.157042	1.87105	0.13424	1.79248	0.452386		0.878053	0.139863	1.50463	0.002206	1.87453	0.118023
474	486	MKKWWEMKREIVG	12	1720.9	0.854933	0.044787	0.953484	0.076506	0.818041	0.137676		0.529306	0.009067	0.736134	0.098802	0.947904	0.037272		0.875413	0.127182	1.24183	0.003045
475	484	KKWWEMKREI	9	1433.77	1.34258	0.052221	1.57018	0.104989	1.62765	0.051932		1.2036	0	1.72228	0	1.60753	0.134703		1.34991	0.644557	1.8938	0.289845
480	486	MKREIVG	6	832.471	0.439438	0.0157	0.445031	0.023124	0.365716	0.053842		0.349692	0.00773	0.446407	0.050454	0.487264	0.022174		0.372933	0.033311	0.454842	0.049036
487	503	VVEPVPHDETYCDPASL	13	1870.85	0.908562	0.04995	0.967665	0.054164	0.873293	0.066036		0.538734	2.27374e-13	0.957096	0.232654	1.08194	0.220051		1.27554	2.27374e-13	1.35979	0.04884
489	496	EPVPHDET	5	923.41	0.331337	0.039593	0.433402	0.049824	0.394915	0.044339		0.141865	0.000507	0.277094	0.012529	0.326539	0.036466		0.331832	0.015128	0.527709	0.023723
490	496	PVPHDET	4	794.368	0.30904	0.05384	0.393269	0.056515	0.339307	0.054178		0.196638	0	0.296437	0.019518	0.309883	0.014457		0.215067	0.01886	0.477603	0.021976
497	503	YCDPASL	5	768.323	0.349272	0.034741	0.36433	0.041363	0.293384	0.076051		0.221138	0.175508	0.219896	0	0.360286	0.027917		0.402417	0.008616	0.397638	0.004749
513	519	IRYYTRT	6	972.526	0.150374	0.047379	0.311385	0.057717	0.426056	0.045942		0.089095	0	0.160154	0.029097	0.561445	0.008324		0.186858	0.097244	0.124416	0.046163
516	522	YTRTLYQ	6	944.484	0.217377	0.039966	0.33081	0.041292	0.356214	0.070224									0.150308	0.022559	0.278575	0.024741
516	523	YTRTLYQF	7	1091.55	0.312364	0.050791	0.443422	0.048535	0.440742	0.06902		0.1013	0.009998	0.213602	0.019117	0.400968	0.01		0.25464	0.018683	0.391935	0.002413
516	524	YTRTLYQFQ	8	1219.61	0.34255	0.056323	0.466583	0.042698	0.461509	0.059293		0.176737	0.037593	0.290427	0.084443	0.494399	0.017183		0.329525	0.007917	0.486117	0.01632
516	528	YTRTLYQFQFQEA	12	1694.82	1.37547	0.087992	1.76573	0.067538	2.38243	0.174614		0.749586	0	1.40019	0.24003	1.84614	0.212792
523	529	FQFQEAL	6	882.436	0.417071	0.003625	0.500451	0.035747	0.462152	0.040068		0.17218	0.071573	0.283123	0.07141	0.347018	0.052808		0.590014	0.050594	0.611318	0.021219
524	530	QFQEALC	6	838.376	0.401078	0.050548	0.423253	0.052687	0.380348	0.065623		0.253821	0.025944	0.297775	0.143827	0.304478	0.041684		0.53169	0.032977	0.507026	0.029004
525	531	FQEALCQ	6	838.376	0.407475	0.060057	0.534124	0.032886	0.611264	0.045722		0.241888	0.048032	0.332063	0.013841	0.531786	0.034322		0.518927	0.079161	0.647748	0.035101
558	568	LRLGKSEPWTL	9	1299.74	1.00906	0.073887	1.16008	0.102171	1.2762	0.147918		0.587435	0.137614	0.748553	0.043981	0.957279	0.054885		1.11902	0.052732	1.30034	0.050541
558	569	LRLGKSEPWTLA	10	1370.78	1.2732	0.156537	1.36775	0.172615	1.48745	0.182657		1.00327	0.155964	1.32744	0.0601	1.95526	0.076158		1.20027	0.076338	1.39714	0.014646
559	568	RLGKSEPWTL	8	1186.66	1.82133	0.039225	1.86812	0.078488	2.05528	0.08201		1.31176	0.091802	1.50675	0.084747	1.59658	0.031836		1.21847	0.036001	1.40861	0.056396
561	570	GKSEPWTLAL	8	1101.59	1.20433	0.089404	1.34464	0.11014	1.25015	0.113319		0.644562	0.235576	0.830962	0.095326	0.975711	0.130632		1.2214	0.09826	1.4008	0.113836
571	579	ENVVGAKNM	8	961.477	1.93713	0.117321	2.10942	0.139985	2.46205	0.168745		1.30924	0	1.51955	0.017286	1.91221	0.064262		1.44538	0.199799	1.99291	0.069428
572	585	NVVGAKNMNVRPLL	12	1524.87	2.53747	0.179302	2.54618	0.140478	2.81822	0.401146		2.03111	0	1.76553	0.167696	2.13841	0.172943		2.83535	0	3.1405	0.070141
573	585	VVGAKNMNVRPLL	11	1410.83	2.37171	0.115026	2.52277	0.211606	2.55667	0.062686		1.47423	0.238875	1.48224	0.043468	1.96583	0.178915		2.27269	0.092185	2.69512	0.077822
574	585	VGAKNMNVRPLL	10	1311.76	2.0223	0.20832	2.1679	0.23454	2.11639	0.194668		1.19902	0.308725	1.36762	0.104297	1.67096	0.125752		2.31176	0.023587	2.57293	0.091188
575	585	GAKNMNVRPLL	9	1212.69	1.90082	0.142226	2.06561	0.181113	2.03101	0.126247		1.32912	0.212437	1.50419	0.039524	1.77681	0.108896		2.05456	0.088769	2.36104	0.216183
575	586	GAKNMNVRPLLN	10	1326.73	2.1255	0.172307	2.31445	0.201822	2.39603	0.10857		1.75088	0	1.70459	0.111741	2.01635	0.14123		2.57893	0.082628	2.8117	0.009915
586	592	NYFEPLF	5	929.44	0.512128	0.063957	0.634987	0.067807	0.602352	0.097879		0.303217	0.259654	0.431729	0.017404	0.559187	0.009774		0.638666	0.000927	0.759821	0.010598
586	593	NYFEPLFT	6	1030.49	0.929179	0.105226	1.14219	0.107264	1.21653	0.128424		0.62897	0.08682	0.782102	0.05526	1.07878	0.038265		1.05049	0.019551	1.26923	0.03525
587	593	YFEPLFT	5	916.445	0.711371	0.11643	0.869607	0.121541	0.935898	0.128787		0.282598	0	0.504398	0.019345	0.761663	0.044213		0.765411	0.011717	0.949032	0.002767
593	603	TWLKDQNKNSF	10	1380.69	1.0972	0.088757	1.16596	0.051376	1.19393	0.051376		0.889256	0	0.856795	0.059778	1.13223	0.068972		1.42189	0.080401	1.67113	0.071992
594	603	WLKDQNKNSF	9	1279.64	0.802436	0.052027	0.872592	0.087831	0.955731	0.25889		0.734802	0	0.661534	0.046073	0.798669	0.046517		0.956789	0	1.21116	0.065847
595	603	LKDQNKNSF	8	1093.56	0.849858	0.063241	0.726656	0.08262	0.688795	0.034075		0.423758	0.229398	0.50996	0.038615	0.654887	0.01613		0.640401	0.077842	1.1484	0.080286
596	603	KDQNKNSF	7	980.48	0.852553	0.068339	0.859683	0.087158	0.888229	0.08535		0.666097	0.082258	0.726442	0.045811	0.838118	0.06609		1.17321	0.071114	1.28844	0.069121
597	603	DQNKNSF	6	852.385	0.660601	0.044926	0.677843	0.044487	0.706045	0.040559		0.479594	0.179901	0.477927	0.024995	0.451317	0.044601		0.731473	0.052623	0.844883	0.09492

## Sheet: Table S5
Table S5: Deuterium exchange summary (biological replicates) for S protein
	1 min							10 min
	Replicate 1		Replicate 2					Replicate 1		Replicate 2
Sequence	Uptake	SD	Uptake	SD	Average	SD		Uptake	SD	Uptake	SD	Average	SD
RTQLPPAYTNS	1.32876	0.034724	1.47179	0.152769	1.40027	0.071517		1.92104	0.05777	1.80729	0.114699	1.86417	0.0568745
FTRGVYYPDKVFRSSVL	3.45226	0.033729	3.28723	0.223833	3.36975	0.082513		3.87576	0.019996	4.18101	0.189823	4.02838	0.152625
VYYPDKVFRSSVL	3.3754	0.039892	3.18228	0.246172	3.27884	0.096558		3.46639	0.038539	3.74792	0.167257	3.60715	0.140765
HSTQDLF	0.531579	0.01794	0.47612	0.005603	0.50385	0.0277295		0.897969	0.022018	1.16063	0.00627	1.0293	0.131333
SNVTWFHAIHVSGTNGTKRFDNPV	3.88946	0.123618	3.80616	0.177297	3.84781	0.041649		4.43069	0.102779	4.50981	0.177297	4.47025	0.0395585
PFNDGVY	0.288558	0.021833	0.378993	0.02525	0.333776	0.0452175		0.61948	0.042969	0.707938	0.021448	0.663709	0.044229
FASTEKSNIIRG	1.65304	0.03348	2.07092	0.145962	1.86198	0.208941		2.23491	0.001472	2.499	0.156417	2.36695	0.132045
FASTEKSNIIRGWIF	1.20359	0.042758	1.5922	0.166594	1.3979	0.194303		1.79129	0.025672	2.33377	0.148403	2.06253	0.271239
ASTEKSNIIRG	1.71912	0.023972	2.01859	0.10602	1.86885	0.149734		2.54392	0.058599	2.74704	0.077843	2.64548	0.101562
STEKSNIIRG	1.44038	0.015158	1.90707	0.076893	1.67373	0.233345		2.00927	0.013932	2.26332	0.141911	2.1363	0.127026
WIFGTTL	0.703032	0.013745	1.12624	0.180932	0.914637	0.211606		1.46805	0.032829	1.44357	0.082775	1.45581	0.01224
GTTLDSKTQSL	1.15048	0.036191	1.60778	0.050112	1.37913	0.22865		2.02166	0.180764	2.4862	0.050193	2.25393	0.23227
DSKTQSL	0.656823	0.025088	0.664585	0.072775	0.660704	0.003881		0.891729	0.039541	0.945049	0.068646	0.918389	0.02666
CNDPFLGV	1.82048	0.041007	2.30865	0.084639	2.06456	0.244087		2.16296	0.05977	2.30193	0.047455	2.23245	0.0694815
YVSQPFL	1.83373	0.020315	2.15082	0.058115	1.99227	0.158546		1.90496	0.008874	2.13182	0.041468	2.01839	0.113432
MDLEGKQGNFKNLRE	2.74237	0.077381	3.142	0.301346	2.94219	0.199814		3.60648	0.034937	4.03113	0.229287	3.8188	0.212325
DLEGKQGNFKNLRE	2.5658	0.077368	3.03367	0.110465	2.79973	0.233936		3.35892	0.062608	3.75729	0.012139	3.5581	0.199185
EGKQGNFKNLR	1.82379	0.07653	2.21407	0.151015	2.01893	0.19514		2.68639	0.041912	2.96038	0.12874	2.82338	0.136995
EGKQGNFKNLRE	1.70007	0.069265	2.18307	0.093485	1.94157	0.2415		2.58378	0.041	2.83623	0.100096	2.71	0.126225
GKQGNFKNLRE	2.12176	0.054745	2.60693	0.153904	2.36435	0.242583		2.93811	0.095145	3.14797	0.058946	3.04304	0.10493
GNFKNLRE	1.32507	0.033667	1.73176	0.134229	1.52842	0.203345		1.95313	0.044311	2.33351	0.175223	2.14332	0.190186
FVFKNIDG	1.23481	0.009159	1.38934	0.042448	1.31208	0.077264		1.37127	0.03897	1.61829	0.051431	1.49478	0.123512
FVFKNIDGYF	1.50767	0.019871	1.44081	0.299029	1.47424	0.0334275		2.11731	0.017689	2.16982	0.270554	2.14357	0.026252
VFKNIDGYF	1.52609	0.057576	1.63141	0.055805	1.57875	0.052658		1.95894	0.057131	2.25958	0.059722	2.10926	0.15032
FKNIDGY	1.19166	0.021761	1.28784	0.062369	1.23975	0.048088		1.6007	0.041567	2.0111	0.06057	1.8059	0.205199
YFKIYSKHTPINL	1.44381	0.047834	1.51741	0.049315	1.48061	0.036797		1.50561	0.05795	1.68842	0.054936	1.59702	0.0914015
FKIYSKHTPINL	1.3745	0.021696	1.41682	0.069047	1.39566	0.0211635		1.51526	0.018193	1.58956	0.075193	1.55241	0.0371545
VRDLPQGF	1.79176	0.034762	1.8419	0.066656	1.81683	0.0250735		1.82192	0.022697	1.87015	0.062988	1.84603	0.024118
VRDLPQGFSAL	2.30371	0.07462	2.48629	0.201006	2.395	0.091288		2.38594	0.049086	2.73786	0.190272	2.5619	0.175959
VRDLPQGFSALEPLVD	2.25369	0.016093	2.67046	0.153919	2.46208	0.208385		3.26105	0.099277	3.70899	0.289834	3.48502	0.223971
SALEPLVD	0.327882	0.023486	0.295145	0.047828	0.311513	0.0163685		1.25477	0.044767	1.70223	0.054118	1.4785	0.223728
SALEPLVDL	0.359362	0.02334	0.256661	0.015739	0.308011	0.0513505		1.43583	0.055689	1.88306	0.092815	1.65945	0.223617
HRSYLTPGDSSSG	2.12334	0.049833	2.40014	0.117108	2.26174	0.138399		2.22321	0.042365	2.32109	0.105751	2.27215	0.0489385
YYVGYLQ	0.504888	0.024977	0.512617	0.100976	0.508752	0.0038645		0.979927	0.029653	1.21158	0.136872	1.09575	0.115827
YYVGYLQPRTFL	0.960398	0.023162	0.717979	0.149427	0.839189	0.121209		1.6972	0.023335	1.7397	0.293816	1.71845	0.0212505
YVGYLQPRTFL	0.875395	0.042739	0.768727	0.120525	0.822061	0.053334		1.42288	0.04182	1.47944	0.034891	1.45116	0.0282815
VGYLQPRTFL	0.786287	0.034369	0.641925	0.225227	0.714106	0.072181		1.35523	0.034311	1.63663	0.270316	1.49593	0.140698
VDCALDPLSETKCTL	2.61114	0.077071	2.23128	0.042056	2.42121	0.189931		4.40906	0.058357	4.18591	0.042056	4.29749	0.111578
CALDPLSET	1.60253	0.043286	1.30451	0.063192	1.45352	0.149011		2.29943	0.047944	2.31458	0.04504	2.30701	0.0075725
PLSETKCTL	1.22071	0.101725	1.04295	0.106114	1.13183	0.0888825		1.88525	0.04046	2.11711	0.127551	2.00118	0.115931
KSFTVEKGIY	2.58514	0.047606	2.44756	0.12863	2.51635	0.0687915		3.15473	0.058265	3.35866	0.170351	3.2567	0.101967
KSFTVEKGIYQTSNF	4.31058	0.089672	4.01246	0.084739	4.16152	0.149056		5.23123	0.029784	5.45538	0.212849	5.34331	0.112072
FTVEKGIY	2.10238	0.038038	1.98056	0.124337	2.04147	0.060911		2.61189	0.052856	2.83924	0.103215	2.72556	0.113674
FTVEKGIYQTSNF	3.80084	0.07522	3.43343	0.159632	3.61713	0.183702		4.63313	0.079092	4.92725	0.043413	4.78019	0.147064
KGIYQTSNF	1.88792	0.041748	1.584	0.115461	1.73596	0.15196		2.52473	0.057561	2.76298	0.076429	2.64385	0.119127
FRVQPTES	2.01855	0.005867	1.86342	0.107937	1.94099	0.077566		2.11014	0.040579	2.28802	0.071946	2.19908	0.0889415
ESIVRFPNITN	1.10962	0.212551	1.11227	0.104107	1.11095	0.001324		1.63322	0.228003	1.58808	0.135521	1.61065	0.0225675
PFGEVFNATRFA	0.516473	0.018766	0.239571	0	0.378022	0.138451		1.75101	0.051794	1.44982	0	1.60041	0.150598
ASVYAWNRKRISNC	1.65369	0.040811	1.56537	0.054879	1.60953	0.0441605		2.70807	0.036918	2.47096	0.145043	2.58951	0.118555
YAWNRKRISNC	1.25787	0.036367	1.20646	0.105703	1.23216	0.0257085		1.78495	0.073193	1.66059	0.100725	1.72277	0.0621775
KRISNCVADYSVLYNSASFS	2.00094	0.065187	1.89823	0.217941	1.94959	0.051357		2.65775	0.040725	2.83752	0.226934	2.74764	0.0898855
STFKCYGVSPTKL	3.75056	0.063607	3.63198	0.073169	3.69127	0.059292		4.05428	0.028046	3.76749	0.073169	3.91088	0.143395
KCYGVSPTKL	2.91791	0.035172	2.75548	0.147085	2.83669	0.081216		3.12902	0.040972	2.99553	0.035939	3.06227	0.066746
YGVSPTK	0.270289	0.015057	0.089255	0.093531	0.179772	0.090517		0.741438	0.050032	0.557553	0.099307	0.649496	0.0919425
TNVYADS	0.29091	0.007076	0.221079	0.023444	0.255995	0.0349155		0.854915	0.040961	0.663797	0.037047	0.759356	0.095559
TNVYADSF	0.289142	0.024854	0.201306	0.075295	0.245224	0.043918		0.77441	0.072148	0.57286	0.05769	0.673635	0.100775
FVIRGDE	0.198116	0.029937	0.212422	0.012085	0.205269	0.007153		0.384174	0.016515	0.388592	0.010458	0.386383	0.002209
FVIRGDEVRQIAPGQTG	2.5674	0.016245	2.47497	0.187604	2.52118	0.046219		2.66622	0.043103	2.92369	0.118489	2.79496	0.128733
VRQIAPGQTGKIAD	2.06206	0.045699	2.02258	0.15452	2.04232	0.01974		3.10253	0.030833	3.03643	0.133688	3.06948	0.033048
VRQIAPGQTGKIADY	1.92818	0.064021	1.9291	0.091651	1.92864	0.0004605		3.01298	0.048257	2.90341	0.091651	2.95819	0.0547835
VRQIAPGQTGKIADYN	2.02421	0.071606	2.0165	0.05823	2.02036	0.003854		3.36179	0.027127	3.17431	0.066746	3.26805	0.093741
PGQTGKIAD	1.42507	0.037478	1.36156	0.097259	1.39332	0.031757		2.06333	0.051315	1.98776	0.140087	2.02555	0.0377885
YNYKLPDDF	0.459776	0.04563	0.55307	0.0638	0.506423	0.046647		0.814098	0.071973	0.874989	0.07313	0.844544	0.0304455
YKLPDDF	0.427328	0.020278	0.562464	0.080976	0.494896	0.067568		0.5703	0.02524	0.648789	0.075685	0.609544	0.0392445
YKLPDDFTG	0.680108	0.021283	0.712574	0.066911	0.696341	0.016233		0.812806	0.02214	0.86777	0.080085	0.840288	0.027482
CVIAWNSNNL	2.02606	0.01585	1.80407	0.118171	1.91506	0.110993		2.15117	0.00745	1.8676	0.067932	2.00938	0.141784
IAWNSNNL	1.91141	0.047822	1.84651	0.051432	1.87896	0.032452		1.98511	0.057476	1.84058	0.038606	1.91285	0.0722635
DSKVGGNY	2.34611	0.014346	2.16131	0.09842	2.25371	0.0924005		2.33907	0.037826	2.19112	0.083377	2.2651	0.0739745
DSKVGGNYNYL	3.35918	0.042937	3.04523	0.046607	3.20221	0.156976		3.66044	0.058784	3.50739	0.074698	3.58391	0.0765275
YRLFRKSNLKPFERD	1.05058	0.044149	1.08121	0.134948	1.06589	0.015316		2.2624	0.129946	2.56973	0.136795	2.41607	0.153664
FRKSNLKPFERD	0.793066	0.046421	0.818582	0.111879	0.805824	0.012758		2.00323	0.073506	2.10124	0.076901	2.05224	0.049004
FRKSNLKPFERDIST	2.23619	0.027924	2.12753	0.150985	2.18186	0.0543285		3.48811	0.011314	3.63386	0.090219	3.56099	0.072875
FRKSNLKPFERDISTE	3.06446	0.112527	3.14201	0.037326	3.10324	0.038775		4.34861	0.123017	4.71702	0.000757	4.53281	0.184204
EIYQAGSTPCNGVEGFN	4.91124	0.052254	4.72638	0.104187	4.81881	0.092427		4.93654	0.142176	5.02237	0.142378	4.97946	0.042915
IYQAGSTPCNGVEGF	4.13278	0.118879	3.97254	0.169679	4.05266	0.080121		4.04159	0.107055	4.00054	0.185954	4.02107	0.020524
NCYFPLQS	1.6285	0.050797	1.66284	0.027054	1.64567	0.017171		2.29775	0.049157	2.474	0.031489	2.38587	0.088123
NCYFPLQSY	1.66021	0.022997	1.72693	0.054977	1.69357	0.0333605		2.74684	0.070343	2.97383	0.076591	2.86034	0.113495
CYFPLQSY	1.156	0.055764	1.21257	0.071774	1.18429	0.028284		2.27694	0.03192	2.40121	0.100031	2.33908	0.0621385
PLQSYGFQPTNGVGYQPYRV	4.81035	0.036398	5.34607	0.171334	5.07821	0.267863		5.37981	0.051063	5.80757	0.173902	5.59369	0.213877
PLQSYGFQPTNGVGYQPYRVVV	4.67508	0.049907	4.93519	0.271634	4.80514	0.130054		5.22572	0.067489	5.44747	0.222301	5.33659	0.110876
YGFQPTNGVGYQPYRV	3.67615	0.039061	4.03756	0.130719	3.85686	0.180704		3.68943	0.113393	4.15291	0.17153	3.92117	0.231739
YGFQPTNGVGYQPYRVVV	3.58966	0.096591	4.01352	0.097678	3.80159	0.211931		3.60132	0.054946	4.08774	0.043883	3.84453	0.243206
YGFQPTNGVGYQPYRVVVL	3.84057	0.128071	4.04649	0.253683	3.94353	0.102956		4.31773	0.10618	4.12858	0.233647	4.22315	0.094571
GFQPTNGVGYQPYRV	3.36206	0.032896	3.75085	0.13892	3.55646	0.194392		3.3385	0.072227	3.67811	0.099319	3.50831	0.169809
VGYQPYRVVVL	0.908284	0.015026	1.01474	0.116564	0.961512	0.0532285		0.927522	0.015183	1.04195	0.100797	0.984738	0.057216
SFELLHAPATVCGPKKSTNL	3.95865	0.078178	3.76261	0.188061	3.86063	0.09802		4.41835	0.010787	4.5208	0.268838	4.46957	0.051225
FELLHAPATVCGPKKSTNL	3.49879	0.080018	3.76614	0.059484	3.63247	0.133675		3.93332	0.063459	4.19926	0.096392	4.06629	0.13297
ELLHAPATVCGPKKSTNL	2.98348	0.101258	3.25716	0.176965	3.12032	0.136839		3.238	0.100486	3.59885	0.148943	3.41842	0.180427
LLHAPATVCGPKKSTNL	2.81905	0.149484	2.75934	0.1675	2.78919	0.0298545		3.27079	0.094626	2.92655	0.173527	3.09867	0.172124
VKNKCVNF	1.03481	0.051309	0.822815	0.118317	0.928813	0.105998		1.86643	0.024495	1.99415	0.124474	1.93029	0.0638595
NFNGLTGTGVL	1.63864	0.065783	1.28553	0.11938	1.46208	0.176551		3.01654	0.085988	2.99079	0.160328	3.00367	0.012875
FNGLTGTGVLTES	3.54072	0.039881	3.80704	0.191245	3.67388	0.133158		3.61316	0.006131	3.78682	0.158265	3.69999	0.0868295
NGLTGTGVL	1.14645	0.02794	1.17666	0.04483	1.16156	0.015105		2.40893	0.058173	2.47103	0.047296	2.43998	0.0310515
LTGTGVL	0.996833	0.012777	0.864771	0.064196	0.930802	0.066031		1.97769	0.017442	1.93378	0.028385	1.95573	0.021956
TESNKKFLPFQQF	3.44068	0.051863	3.78423	0.178284	3.61246	0.171779		3.32457	0.04628	3.67257	0.128057	3.49857	0.174
TESNKKFLPFQQFGRD	3.88752	0.11795	4.07904	0.086865	3.98328	0.095758		3.97045	0.134717	4.22061	0.108653	4.09553	0.125077
IADTTDA	1.27796	0.019942	1.07009	0.072945	1.17403	0.103936		1.36318	0.0358	1.18859	0.073139	1.27589	0.087293
IADTTDAVRDPQT	2.43931	0.015854	2.13182	0.052574	2.28557	0.153747		3.68048	0.0105	3.26369	0.295769	3.47208	0.208393
IADTTDAVRDPQTLE	2.9592	0.093166	2.79823	0.263599	2.87872	0.0804865		4.9718	0.089767	4.82052	0.015639	4.89616	0.075638
AVRDPQTL	1.21899	0.024816	1.019	0.133228	1.119	0.099991		2.06146	0.015946	2.00946	0.099698	2.03546	0.025998
AVRDPQTLE	1.756	0.015645	1.31408	0.051729	1.53504	0.220961		3.16429	0.009999	3.1305	0.054423	3.14739	0.016892
VRDPQTL	1.34985	0.03125	1.14889	0.168058	1.24937	0.100482		2.0141	0.029475	1.89633	0.094155	1.95521	0.058882
VRDPQTLE	1.47924	0.007124	1.14006	0.102005	1.30965	0.169587		2.62844	0.021925	2.55801	0.143141	2.59322	0.0352155
ILDITPCSF	1.27871	0.034117	1.00096	0.0525	1.13984	0.138873		2.11661	0.027934	1.87837	0.079137	1.99749	0.11912
LDITPCSF	1.40889	0.031412	1.44723	0	1.42806	0.019172		2.17298	0.013779	2.09633	0.008013	2.13465	0.038321
DITPCSF	1.02617	0.00863	0.916212	0.099556	0.971191	0.0549795		1.44041	0.02657	1.36302	0.120382	1.40171	0.0386925
DITPCSFGGVS	2.47147	0.051447	2.0423	0.09879	2.25688	0.214584		3.1316	0.019844	2.93325	0.115762	3.03242	0.0991755
TPGTNTSNQVAVLYQDV	3.65586	0.053847	3.86988	0.228704	3.76287	0.107012		3.84132	0.063617	4.07982	0.227345	3.96057	0.119247
CTEVPVAIHADQLTPT	1.92505	0.00435	1.99065	0.137694	1.95785	0.032801		2.21072	0.028736	2.27928	0.260094	2.245	0.03428
PVAIHADQLTPTW	2.83704	0.09387	3.19557	0.176903	3.0163	0.179264		2.80589	0.072955	3.38879	0.027467	3.09734	0.291447
DQLTPTW	1.96308	0.020734	1.69671	0.026881	1.8299	0.133185		2.09051	0.021398	2.17414	0.041026	2.13232	0.0418185
DQLTPTWRVYSTGSNVF	6.70619	0.073629	6.35082	0.149943	6.52851	0.177689		7.34934	0.097827	7.12001	0.182777	7.23467	0.114667
RVYSTGSNV	2.72768	0.020872	2.43771	0.058717	2.5827	0.144985		2.88681	0.049795	2.71242	0.06135	2.79961	0.087197
YSTGSNV	2.05604	0.055045	2.06659	0.05344	2.06132	0.005273		2.19513	0.057976	1.92613	0.102972	2.06063	0.134501
YSTGSNVF	1.63363	0.023688	1.6059	0.047677	1.61976	0.0138635		1.90969	0.078809	2.01755	0.043494	1.96362	0.0539305
VFQTRAGCL	2.11626	0.030537	1.84118	0.050048	1.97872	0.137545		2.62327	0.0563	2.86922	0.036349	2.74625	0.122977
QTRAGCL	1.78304	0.011664	1.80427	0.12904	1.79366	0.010614		2.21992	0.053319	2.27786	0.112295	2.24889	0.028972
CDIPIGAGIC	2.1936	0.059184	1.89374	0.120407	2.04367	0.149929		3.03679	0.007395	3.3052	0.12798	3.17099	0.134207
IPIGAGIC	1.99785	0.040775	1.68165	0.089182	1.83975	0.158102		2.54544	0.064548	2.49093	0.193064	2.51819	0.027255
PIGAGIC	1.30561	0.033721	1.26842	0.211469	1.28702	0.018596		1.72492	0.040063	1.93045	0.075951	1.82768	0.102767
ASYQTQTNSPGSASSVASQ	6.70662	0.080984	6.80667	0.05	6.75664	0.050028		6.74862	0.128662	6.47786	2.27374e-13	6.61324	0.135377
ASYQTQTNSPGSASSVASQSIIA	8.92335	0.103164	9.38001	0	9.15168	0.228328		9.30284	0.093732	9.36154	0	9.33219	0.0293515
YQTQTNSPGSASSVASQ	4.62276	0.015364	5.22038	0.174231	4.92157	0.298809		5.01087	0.140239	5.30084	0	5.15586	0.144982
IAYTMSL	3.31033	0.020494	3.05973	0.05957	3.18503	0.125301		3.43958	0.056027	3.48529	0.04686	3.46244	0.0228555
YTMSLGAE	3.19295	0.025486	2.95516	0.026846	3.07406	0.118896		3.1457	0.037126	2.96768	0.036746	3.05669	0.08901
TMSLGAENS	2.96995	0.008897	2.77943	0.019765	2.87469	0.095258		3.03612	0.046977	2.87157	0.197387	2.95384	0.0822715
GAENSVA	2.1746	0.011208	2.08635	0.126497	2.13047	0.044127		2.15563	0.012385	2.09831	0.12082	2.12697	0.028663
PTNFTISVTTEILPVS	2.01118	0.014554	1.91101	0.117713	1.9611	0.0500855		3.21876	0.048204	3.15997	0.132631	3.18936	0.029399
TEILPVSM	0.566097	0.034094	0.575104	0.093096	0.5706	0.0045035		0.780452	0.024756	0.687365	0.100944	0.733909	0.0465435
EILPVSM	0.16965	0.023648	0.175679	0.016817	0.172664	0.0030145		0.350952	0.030741	0.282551	0.013983	0.316751	0.0342005
TKTSVDCT	1.68232	0.004697	1.49606	0.091674	1.58919	0.093128		2.33684	0.013777	2.20172	0.068171	2.26928	0.0675575
YICGDSTE	1.36689	0.036103	1.15048	0.043045	1.25869	0.108209		1.62315	0.05079	1.39203	0.059146	1.50759	0.115559
LLQYGSF	1.91768	0.052808	2.13245	0.094122	2.02506	0.107386		1.95109	0.03745	2.11355	0.084495	2.03232	0.081234
LNRALTG	1.06198	0.020163	1.02909	0.150369	1.04554	0.0164455		2.1437	0.028142	1.84017	0.140519	1.99193	0.151764
NRALTGIA	1.05268	0.008384	1.09992	0.087925	1.0763	0.023618		2.21852	0.02483	2.39757	0.069988	2.30805	0.0895255
IAVEQDKNTQEVF	0.846771	0.018495	0.829459	0.163646	0.838115	0.008656		2.05133	0.026581	1.69478	0.144353	1.87306	0.178276
QDKNTQEVF	0.511379	0.011855	0.381677	0.087229	0.446528	0.064851		1.36037	0.005037	0.929759	0.175245	1.14506	0.215306
VFAQVKQIYKTPPIKDFGGFNF	2.77752	0.040037	2.6334	0.149799	2.70546	0.0720585		3.60478	0.038433	3.83437	0.161911	3.71958	0.114794
AQVKQIYKTPPIKD	4.93623	0.067866	5.26239	0.227125	5.09931	0.16308		5.01773	0.091663	5.34172	0.171288	5.17973	0.161992
QVKQIYKTPPIKD	4.96128	0.105844	5.03688	0.213768	4.99908	0.0378005		4.86925	0.094631	5.16579	0.189749	5.01752	0.14827
FNFSQILPDPSKPSKR	3.03718	0.108084	3.10232	0.218272	3.06975	0.0325725		3.20462	0.054669	3.61731	0.206269	3.41097	0.206346
LLFNKVTL	2.28575	0.041164	2.33501	0.102263	2.31038	0.02463		2.34586	0.018662	2.44143	0.093621	2.39365	0.0477845
LFNKVTL	2.23269	0.037803	2.37217	0.08878	2.30243	0.069739		2.1376	0.054741	2.39749	0.073345	2.26754	0.129943
LFNKVTLADAGF	3.95001	0.039256	4.25436	0.146103	4.10219	0.152177		4.081	0.083679	4.23614	0.111968	4.15857	0.0775705
FNKVTLADAGF	3.39545	0.061275	3.79153	0.085574	3.59349	0.19804		3.35393	0.034005	3.83786	0.099168	3.59589	0.241965
NKVTLADAGF	3.63921	0.047039	3.85153	0.139135	3.74537	0.106159		3.53717	0.070742	3.8324	0.08079	3.68479	0.147612
FIKQYGDCL	2.64157	0.05854	2.97277	0.102998	2.80717	0.165604		2.67812	0.056939	2.618	0.061773	2.64806	0.030062
IKQYGDC	1.87891	0.031608	1.77622	0.11346	1.82756	0.051345		1.89235	0.061196	1.80473	0.057978	1.84854	0.0438085
IKQYGDCLGDIAARD	5.26077	0.076965	5.28704	0.111792	5.2739	0.0131355		5.11077	0.028981	5.2052	0.11603	5.15799	0.0472165
GDIAARD	2.47218	0.010694	2.2858	0.156706	2.37899	0.0931915		2.47764	0.031411	2.2932	0.129677	2.38542	0.092219
AQKFNGL	1.62201	0.050873	1.53032	0.083521	1.57617	0.0458485		1.93931	0.013433	1.86717	0.101297	1.90324	0.0360695
LTVLPPLL	1.73491	0.040201	1.63494	0.047628	1.68492	0.049982		1.7362	0.011743	1.94899	0.101678	1.84259	0.106395
LTVLPPLLT	2.62514	0.046804	2.67912	0.134913	2.65213	0.0269905		2.61004	0.01333	2.68515	0.122782	2.6476	0.037552
TVLPPLL	1.2628	0.014539	1.28058	0.040825	1.27169	0.0088865		1.33074	0.017141	1.40249	0.035144	1.36661	0.0358795
TVLPPLLT	1.89349	0.033896	1.9924	0.079296	1.94295	0.049455		1.90883	0.026474	2.01397	0.091949	1.9614	0.052571
IAQYTSAL	1.42533	0.015645	1.24384	0.035524	1.33458	0.0907415		2.42476	0.032574	2.83384	0.051944	2.6293	0.204544
LLAGTITSGW	2.58382	0.060508	2.93505	0.07158	2.75944	0.175615		2.59119	0.063736	3.08203	0.088895	2.83661	0.245419
LAGTITSGWTFGAG	6.76364	0.049675	6.62253	0.052453	6.69309	0.0705565		6.99648	0.028983	6.66709	0.114059	6.83178	0.164695
LAGTITSGWTFGAGAA	5.92495	0.146687	6.20595	0.189747	6.06545	0.140499		6.27487	0.093768	6.2133	0.182491	6.24408	0.0307845
WTFGAGAALQIPF	0.897137	0.045077	0.898029	0.11268	0.897583	0.000446		1.60297	0.0216	1.8757	0.022519	1.73934	0.136365
GAGAALQIPF	1.31454	0.037441	1.09088	0.14917	1.20271	0.111826		2.65445	0.053186	2.36857	0.058424	2.51151	0.142939
AALQIPFA	3.08774	0.024209	3.28942	0.097473	3.18858	0.100842		3.0238	0.028626	3.25268	0.0578	3.13824	0.114439
AALQIPFAMQ	3.5794	0.022747	3.48305	0.110118	3.53122	0.048173		3.3925	0.068665	3.55653	0.044102	3.47452	0.082015
LQIPFAMQ	2.5684	0.028384	2.46709	0.077642	2.51775	0.050656		2.64438	0.030212	2.85101	0.061593	2.74769	0.103317
AYRFNGIGVTQNVL	4.52658	0.074089	4.34193	0.012457	4.43426	0.092327		5.75124	0.045956	6.09988	0.106717	5.92556	0.174319
RFNGIGVTQNVL	3.99754	0.048182	4.07326	0.150393	4.0354	0.037864		5.05588	0.057648	5.07803	0.077376	5.06695	0.0110745
IGVTQNVL	2.76535	0.032292	2.56018	0.193466	2.66276	0.102582		3.40457	0.056944	3.54803	0.064147	3.4763	0.071733
YENQKLIA	2.02078	0.016765	1.9254	0.072972	1.97309	0.0476885		2.86648	0.050303	2.86276	0.093119	2.86462	0.001859
IANQFNSAIGKIQDSL	4.39406	0.103168	4.57496	0.295521	4.48451	0.0904495		6.02924	0.138852	5.70985	0.088946	5.86955	0.159695
FNSAIGKIQDSLSSTASAL	8.20786	0.082669	7.9922	0.202429	8.10003	0.107827		8.87834	0.03808	8.58327	0.053616	8.73081	0.147537
NSAIGKIQD	2.62135	0.030518	2.55736	0.137838	2.58936	0.0319945		3.18822	0.021145	3.2275	0.078308	3.20786	0.0196415
NSAIGKIQDSL	3.7549	0.009126	3.59929	0.232144	3.67709	0.0778055		4.24942	0.047431	4.17644	0.226417	4.21293	0.0364915
NSAIGKIQDSLSSTASAL	7.82202	0.078842	7.65998	0.102184	7.741	0.081023		8.30565	0.028988	8.09935	0.060161	8.2025	0.10315
GKIQDSLSSTAS	4.52244	0.046183	4.69917	0.111261	4.6108	0.088365		4.38562	0.068315	4.53371	0.065726	4.45967	0.074046
SLSSTASAL	3.33974	0.048751	3.12771	0.121564	3.23373	0.106016		3.29454	0.042711	3.20293	0.121821	3.24874	0.0458015
GKLQDVVNQNAQALNT	8.10593	0.021103	8.11697	0.142269	8.11145	0.0055205		8.72983	0.05676	9.02571	0.136582	8.87777	0.147937
VVNQNAQAL	3.82178	0.031266	3.39928	0.080083	3.61053	0.21125		3.75215	0.068108	3.6065	0.080083	3.67933	0.072826
LVKQLSSN	2.76475	0.031089	2.75788	0.118426	2.76132	0.0034365		2.70283	0.030102	2.71068	0.120167	2.70675	0.0039255
LVKQLSSNF	2.72727	0.066568	2.87073	0.042721	2.799	0.071734		2.68905	0.047559	2.93798	0.062291	2.81352	0.124468
LVKQLSSNFGAISSVL	7.31104	0.074777	7.69871	0.028677	7.50487	0.193833		7.23266	0.033654	7.52619	0.047827	7.37942	0.146761
VKQLSSNF	2.37036	0.044754	2.4929	0.086253	2.43163	0.0612675		2.3206	0.062747	2.50373	0.046008	2.41216	0.091563
FGAISSVL	2.82344	0.053547	2.88273	0.119016	2.85309	0.029647		2.67526	0.069464	2.87676	0.120275	2.77601	0.100751
GAISSVL	2.28363	0.044347	2.32686	0.072295	2.30524	0.0216115		2.26058	0.030675	2.56313	0.163934	2.41185	0.151276
ILSRLDPPEAE	2.2536	0.019589	2.48	0.021844	2.3668	0.113198		2.24207	0.036341	2.30271	0.011733	2.27239	0.0303235
SRLDPPEA	1.78639	0.029727	1.72048	0.035945	1.75343	0.0329555		1.72688	0.062982	1.72875	0.053317	1.72781	0.0009345
SRLDPPEAE	1.96525	0.017806	2.01821	0.081434	1.99173	0.0264805		1.91389	0.026651	2.06236	0.092588	1.98813	0.074235
IDRLITGRL	2.89289	0.03959	3.07523	0.189058	2.98406	0.0911705		3.18772	0.030904	3.46997	0.155014	3.32884	0.141122
DRLITGRL	2.64432	0.029293	2.95831	0.175245	2.80131	0.156995		2.97548	0.031469	3.20235	0.175245	3.08891	0.113434
SLQTYVTQQLIRAAEIR	2.17976	0.040644	2.00885	0.145765	2.0943	0.0854555		3.38367	0.072708	3.25065	0.158775	3.31716	0.066512
IRASANL	1.12713	0.03471	0.982847	0.157479	1.05499	0.07214		2.24705	0.114573	1.98931	0.049502	2.11818	0.128871
AATKMSE	0.451405	0.032122	0.388932	0.060085	0.420169	0.0312365		1.06022	0.043424	0.804511	0.059628	0.932368	0.127857
CVLGQSKRVDF	2.15992	0.035472	2.08988	0.117305	2.1249	0.035022		2.62193	0.067729	2.74571	0.117247	2.68382	0.061894
CVLGQSKRVDFCGKG	3.17025	0.047894	3.55904	0.219275	3.36465	0.194397		3.13989	0.064944	3.4136	0.081919	3.27675	0.136857
LGQSKRVDF	1.77694	0.032211	1.76777	0.103361	1.77236	0.004584		2.16929	0.045814	2.25656	0.118772	2.21293	0.043635
GQSKRVDF	1.635	0.037933	1.85372	0.122515	1.74436	0.109362		1.69332	0.040452	1.85664	0.178055	1.77498	0.0816615
CGKGYHL	0.397738	0.015493	0.425615	0.071508	0.411677	0.0139385		0.636933	0.019732	0.507912	0.079445	0.572423	0.0645105
PQSAPHGVVFL	0.266754	0.032198	0.221313	0.055928	0.244034	0.0227205		0.433773	0.045403	0.341198	0.074329	0.387486	0.0462875
PAICHDGKAHFPREGVF	1.01582	0.040073	0.967643	0.053074	0.99173	0.0240865		1.4794	0.035996	1.32098	0.049476	1.40019	0.079209
FVTQRNFYEPQIITT	2.46517	0.055893	2.28555	0.040859	2.37536	0.089813		3.70955	0.067218	3.46268	0.04086	3.58611	0.123437
FYEPQIIT	0.877757	0.0346	0.821484	0.037284	0.849621	0.0281365		1.45626	0.03003	1.35011	0.052111	1.40319	0.0530755
FYEPQIITT	1.40842	0.044565	1.36108	0.113741	1.38475	0.023669		1.96979	0.037541	1.83757	0.127846	1.90368	0.066108
FVSGNCD	1.3793	0.022654	1.28647	0.03174	1.33289	0.0464155		1.46319	0.034712	1.39882	0.02585	1.43101	0.0321845
FKEELDKYFKNHTSPDVDLGDI	9.36577	0.072908	9.16818	0.076373	9.26698	0.0987935		9.77312	0.027338	9.4063	0	9.58971	0.183413
SVVNIQKEIDRL	5.6764	0.045703	5.62806	0.203004	5.65223	0.024169		5.45153	0.051187	5.81432	0.050794	5.63293	0.181394
SVVNIQKEIDRLNE	6.66626	0.064369	7.0192	0.195231	6.84273	0.176469		6.33623	0.076416	6.73967	0.132791	6.53795	0.20172
NIQKEIDRL	4.81384	0.024387	4.78515	0.125774	4.79949	0.0143425		4.64341	0.050105	4.76488	0.156295	4.70415	0.0607345
IQKEIDRLNE	2.99031	0.04678	3.16889	0.059515	3.0796	0.0892885		2.947	0.072068	3.25008	0	3.09854	0.151536
WSHPQFE	0.727633	0.01466	0.691194	0.045315	0.709413	0.0182195		0.701467	0.021317	0.797766	0.045315	0.749616	0.0481495
EKGGGSGGGSGGSAWSHPQFE	3.79398	0.050226	3.77888	0.163479	3.78643	0.007549		3.63781	0.103976	3.95598	0.13224	3.79689	0.159081

## Sheet: Table S6
Table S6: Deuterium exchange summary (biological replicates) for S:ACE2
	1 min							10 min
	Replicate 2		Replicate 1					Replicate 2		Replicate 1
Sequence	Uptake	SD	Uptake	SD	Average	SD		Uptake	SD	Uptake	SD	Average	SD
RTQLPPAYTNS	1.41671	0.046899	1.4254	0.117257	1.42106	0.0043455		1.89814	0.119463	1.44846	0.058763	1.6733	0.22484
FTRGVYYPDKV	3.77545	0	3.7825	0.222991	3.77898	0.0035285		4.21692	0.100457	4.03298	0.136153	4.12495	0.091973
FTRGVYYPDKVFRSSVL	3.54783	0.107538	3.98636	0.138056	3.76709	0.219268		4.0678	0.036825	4.15805	0.135313	4.11292	0.0451285
VYYPDKVFRSSVL	3.19155	0.106793	3.48886	0.221723	3.3402	0.148656		3.59948	0.008605	3.22315	0.132904	3.41131	0.188163
HSTQDLF	0.748802	0.040402	0.645195	0.177886	0.696998	0.0518035		1.20965	0.021377	1.00006	0.17037	1.10486	0.104792
PFNDGVY	0.335362	0.02579	0.374691	0.043603	0.355027	0.0196645		0.583628	0.014017	0.46901	0.055754	0.526319	0.057309
FASTEKSNIIRGWIF	1.5031	0.066162	1.81211	0.164299	1.65761	0.154504		1.82962	0.030545	2.08311	0.135435	1.95637	0.126743
ASTEKSNIIRG	1.68066	0	2.23469	0.093982	1.95768	0.27702		2.34961	0.074889	2.42216	0.064775	2.38588	0.036277
STEKSNIIRG	1.42855	0.089979	1.94249	0.087074	1.68552	0.256972		1.96682	0.039249	2.00114	0.07916	1.98398	0.017158
DSKTQSL	0.573751	0.027431	0.668196	0.111403	0.620974	0.0472225		0.790134	0.0221	0.848581	0.108668	0.819357	0.0292235
DSKTQSLL	0.48538	0.069205	0.619912	0.029852	0.552646	0.067266		0.64029	0.05576	0.703688	0.027058	0.671989	0.031699
CNDPFLGV	1.81387	0.033842	2.36472	0.056086	2.08929	0.275427		2.0359	0.055678	2.0809	0.072117	2.0584	0.022497
CTFEYVSQPFLMDLEGK	4.46264	0.098991	3.94864	0.037197	4.20564	0.256997		7.79603	0.047988	7.06065	0.075669	7.42834	0.367694
YVSQPFL	1.78255	0.08156	2.09466	0.083818	1.9386	0.156057		1.92068	0.067184	1.84867	0.027624	1.88468	0.036004
MDLEGKQGNF	2.12891	0.086058	2.31697	0.082018	2.22294	0.0940315		2.21715	0.073477	1.8591	0.075632	2.03812	0.179029
DLEGKQGNFKNLRE	2.7418	0.195411	3.2604	0.153044	3.0011	0.259296		3.55301	0.184319	3.19878	0.145337	3.37589	0.177119
EGKQGNFKNLRE	1.95339	0.075186	2.43186	0.211251	2.19263	0.239237		2.53345	0.042385	2.52402	0.174517	2.52873	0.0047155
GNFKNLRE	1.65324	0.105026	1.64392	0.143392	1.64858	0.004659		2.17563	0.056868	1.836	0.263002	2.00581	0.169817
FVFKNIDG	1.20755	0.055818	1.392	0.044623	1.29977	0.0922275		1.34933	0.039299	1.27155	0.048463	1.31044	0.038892
FVFKNIDGY	1.24822	0.051246	1.53844	0.155012	1.39333	0.145107		1.77937	0.024152	1.71315	0.138934	1.74626	0.033107
FVFKNIDGYF	1.52917	0.054213	1.82762	0.135868	1.6784	0.14922		2.17249	0.017126	2.07882	0.096522	2.12565	0.0468335
VFKNIDGYF	1.56442	0.056187	1.63943	0.067406	1.60193	0.037505		2.09603	0.120316	2.00742	0.092918	2.05172	0.0443045
FKNIDGY	1.21881	0.022576	1.41986	0.024093	1.31934	0.100526		1.69703	0.00071	1.58366	0.060653	1.64035	0.0566835
FKNIDGYF	1.33573	0.067108	1.55038	0.053639	1.44305	0.107321		1.85386	0.011456	1.74808	0.040424	1.80097	0.0528905
YFKIYSKHTPINL	1.46177	0.042999	1.61945	0.067132	1.54061	0.0788415		1.63144	0.037145	1.39345	0.056217	1.51244	0.118995
FKIYSKHTPINL	1.33715	0.047276	1.47731	0.064213	1.40723	0.0700785		1.51762	0.027747	1.24396	0.094073	1.38079	0.136829
VRDLPQGF	1.72436	0.059015	1.43693	0.072715	1.58065	0.143715		1.83204	0.012574	1.6564	0.084039	1.74422	0.087824
VRDLPQGFSAL	2.27127	0.106803	2.4712	0.21476	2.37123	0.099966		2.43408	0.027571	2.25146	0.180928	2.34277	0.09131
VRDLPQGFSALEPLVD	2.35862	0.032748	2.77248	0.116676	2.56555	0.20693		3.34362	0	3.66478	0.100982	3.5042	0.160575
SALEPLVDL	0.470096	0.015652	0.516077	0.036117	0.493086	0.0229905		1.44707	0.021378	1.74178	0.152958	1.59443	0.147353
ALHRSYLTPGDSS	0.683929	0.077318	0.511773	0.166696	0.597851	0.086078		0.865463	0.070515	0.748928	0.154394	0.807195	0.0582675
HRSYLTPGDSSSG	2.06668	0.035495	2.36703	0.157641	2.21686	0.150176		2.09464	0.134101	1.93607	0.11533	2.01535	0.0792875
YYVGYLQ	1.04855	0.094522	0.762188	0.180153	0.905371	0.143183		1.48455	0.085198	1.25165	0.197193	1.3681	0.116448
YYVGYLQPRTFL	0.89	0.023378	0.539622	0.16467	0.714811	0.175189		1.66479	0.025973	1.72522	0.179905	1.69501	0.030215
YVGYLQPRTFL	0.978751	0.040035	1.48147	0.051733	1.23011	0.251361		1.40701	0.016221	2.06868	0.155901	1.73785	0.330839
VGYLQPRTFL	1.04327	0.050525	1.23499	0.0695	1.13913	0.095857		1.42591	0.080058	1.78346	0.069507	1.60468	0.178775
VDCALDPLSETKCTL	2.63164	0.055081	2.25642	0.015709	2.44403	0.187609		4.75771	0.062924	4.12657	0.181088	4.44214	0.315571
CALDPLSET	1.67624	0.032152	1.44853	0.049555	1.56238	0.113854		2.334	0.032523	1.89181	0.054196	2.1129	0.221094
PLSETKCTL	1.42049	0.030001	1.13775	0.023838	1.27912	0.141371		1.91195	0.073308	1.59874	0.025011	1.75534	0.156604
KSFTVEKGIY	2.57031	0.091932	2.54919	0.074335	2.55975	0.01056		3.15503	0.085402	2.76112	0.081982	2.95808	0.196958
KSFTVEKGIYQTSNF	4.24361	2.27374e-13	4.19087	0.087563	4.21724	0.02637		5.28529	2.27374e-13	4.59958	0.091402	4.94243	0.342856
FTVEKGIY	2.07239	0.063244	2.07476	0.044701	2.07358	0.001185		2.63355	0	2.39659	0.046559	2.51507	0.118479
FTVEKGIYQTSN	3.60139	0.178786	3.26661	0.115342	3.434	0.167387		4.51781	0.026591	4.14224	0.111195	4.33003	0.187782
FTVEKGIYQTSNF	3.76365	0.155175	3.86517	0.185523	3.81441	0.05076		4.83339	0.05053	4.23524	0.144695	4.53432	0.299074
KGIYQTSNF	1.87972	0.099646	1.779	0.033631	1.82936	0.0503595		2.45664	0.017043	2.1224	0.078047	2.28952	0.167118
FRVQPTES	1.90413	0.085706	1.92745	0.076128	1.91579	0.0116595		2.12305	0.039496	1.98608	0.094604	2.05456	0.0684895
PFGEVFNATRFA	0.717587	0.02998	0.399977	0.085214	0.558782	0.158805		1.73161	0.064707	1.31846	0.085214	1.52504	0.206574
ASVYAWNRKRISNC	1.71674	0	1.43271	0.033131	1.57472	0.142017		2.31429	0.053829	1.84348	0.012906	2.07888	0.235404
KCYGVSPTKL	2.68206	0.110497	2.71085	0.081008	2.69645	0.0143915		2.93425	0.027016	2.73123	0.081008	2.83274	0.101511
YGVSPTK	0.218593	0.025793	0.076908	0.079606	0.147751	0.0708425		0.595137	0.001004	0.496296	0.073358	0.545717	0.0494205
TNVYADS	0.373702	0.02599	0.208316	0.028221	0.291009	0.082693		0.761189	0	0.52993	0.03421	0.64556	0.115629
TNVYADSF	0.334789	0.021243	0.198705	0.088793	0.266747	0.068042		0.51628	0.00476	0.38042	0.079787	0.44835	0.06793
FVIRGDE	0.058396	0.028209	0.105552	0.0802	0.081974	0.023578		0.133682	0.022054	0.103777	0.044275	0.118729	0.0149525
VRQIAPGQTGKIAD	1.89751	0.108545	1.86252	0.089042	1.88001	0.0174945		2.64908	0.087767	2.11009	0.113438	2.37958	0.269499
VRQIAPGQTGKIADYN	1.96499	0.113547	1.92894	0.050431	1.94697	0.0180225		2.78629	0.054236	2.33141	0.064413	2.55885	0.227437
PGQTGKIAD	1.24018	0.080376	1.28692	0.101189	1.26355	0.023366		1.71255	0.030276	1.63648	0.156224	1.67452	0.038034
YKLPDDF	0.410291	0.022509	0.563134	0.07146	0.486712	0.0764215		0.470829	0.047523	0.6292	0.072577	0.550014	0.0791855
YKLPDDFTG	0.685217	0.047701	0.831925	0.06779	0.758571	0.073354		0.770455	0.024414	0.794431	0.110913	0.782443	0.011988
CVIAWNSNNL	1.90238	0.071201	1.72907	0.130983	1.81573	0.0866565		2.19956	0.054207	1.58147	0.087139	1.89052	0.309042
IAWNSNNL	1.82679	0.106152	1.67924	0.038606	1.75301	0.0737775		2.02611	0.029232	1.55149	0.044751	1.7888	0.237313
DSKVGGNY	2.26924	0.076337	2.13043	0.092584	2.19984	0.069407		2.37966	0.01948	2.02031	0.103115	2.19999	0.179679
DSKVGGNYNYL	3.09196	0.135433	3.00451	0.046988	3.04824	0.0437255		3.6839	0.034011	3.141	0.0248	3.41245	0.271447
YRLFRKSNLKPFERD	0.765137	0.024768	0.774092	0.103127	0.769614	0.0044775		1.64192	0.025174	1.88547	0.107423	1.7637	0.121779
FRKSNLKPFERD	0.80456	0.065086	0.832434	0.112346	0.818497	0.013937		1.57543	0.117935	1.4793	0.103574	1.52736	0.048064
FRKSNLKPFERDISTE	2.83544	0.097725	3.15012	0.044432	2.99278	0.157339		3.95468	0.017126	3.89387	0.021478	3.92427	0.030406
EIYQAGSTPCNGVEGFN	4.64759	0.168081	4.85991	0.165618	4.75375	0.10616		5.00718	0	5.11851	0.104187	5.06285	0.055664
IYQAGSTPCNGVEGF	3.89482	0.221097	3.72032	0.122358	3.80757	0.0872495		4.11696	0.221395	3.31328	0.084918	3.71512	0.401839
NCYFPLQS	1.47381	0.079179	1.56752	0.040472	1.52067	0.046855		2.00827	0.127419	1.97695	0.050543	1.99261	0.015659
NCYFPLQSY	1.47187	0.038282	1.58318	0.130809	1.52752	0.0556535		2.3452	0.012128	2.29946	0.042018	2.32233	0.0228745
CYFPLQSY	1.13697	0.048737	1.1961	0.099102	1.16654	0.0295655		1.86228	0.052363	1.81845	0.054718	1.84037	0.0219155
PLQSYGFQPTNGVGYQPYRV	4.13812	0.177099	4.49098	0.106223	4.31455	0.176426		5.19411	0.06322	4.77626	0.080445	4.98519	0.208923
PLQSYGFQPTNGVGYQPYRVVV	4.11321	0.150343	4.13663	0.131985	4.12492	0.0117095		5.06402	0.087595	4.62958	0.202028	4.8468	0.217221
YGFQPTNGVGYQPYRV	3.11105	0.157671	3.47409	0.144013	3.29257	0.181521		3.7207	0.073194	3.46183	0.086989	3.59126	0.129435
YGFQPTNGVGYQPYRVVVL	3.42889	0.120267	3.49874	0.203148	3.46382	0.0349245		4.41707	0.036772	3.44552	0.170222	3.9313	0.485773
GFQPTNGVGYQPYRV	2.74812	0.160938	3.16546	0.179106	2.95679	0.208672		3.3562	0.086754	3.08809	0.084986	3.22214	0.134051
VGYQPYRVVVL	0.623423	0.074223	0.713456	0.152612	0.668439	0.0450165		0.929128	0.009703	0.785656	0.075951	0.857392	0.071736
SFELLHAPATVCGPKKSTNL	3.84513	0.190545	3.90285	0.055138	3.87399	0.0288595		4.4104	0.070478	3.72829	0.145249	4.06935	0.341058
FELLHAPATVCGPKKSTNL	3.63784	0.193393	3.4177	0.075782	3.52777	0.110072		4.19276	0.170919	3.29856	0.062957	3.74566	0.447095
LLHAPATVCGPKKSTNL	2.88486	0.209571	2.88001	0.095048	2.88243	0.002428		3.33662	0	2.51325	0.155259	2.92494	0.411682
NFNGLTGTGVL	1.8917	0.099449	1.4139	0.069306	1.6528	0.238903		3.09605	0.16318	2.47538	0.11987	2.78571	0.310335
FNGLTGTGVLTES	3.46432	0.172255	3.89919	0.106568	3.68175	0.217433		3.48431	0.002728	3.64221	0.106568	3.56326	0.078952
LTGTGVL	1.18299	0.048348	0.883939	0.087252	1.03347	0.149527		1.90922	0.041092	1.72306	0.033839	1.81614	0.0930815
TESNKKFLPFQQF	3.12145	0.189129	3.53686	0.144414	3.32915	0.207709		3.3368	0.039181	3.0928	0.13008	3.2148	0.122002
TESNKKFLPFQQFGRD	4.08889	2.27374e-13	4.31695	0.230142	4.20292	0.114028		4.05462	0.104885	3.75816	0.095901	3.90639	0.148228
SNKKFLPFQQFGRD	3.70823	0.210637	3.66482	0.083013	3.68652	0.0217075		3.9295	0	3.56538	0.132247	3.74744	0.18206
IADTTDA	1.53909	0.020541	1.19839	0.062966	1.36874	0.170349		1.7167	0.054216	1.08816	0.074639	1.40243	0.31427
IADTTDAVRDPQT	2.57329	0.040843	2.22597	0.111575	2.39963	0.173661		3.52895	0.0243	3.49426	0	3.51161	0.0173465
AVRDPQTLE	2.19978	0.093885	1.83758	0.056294	2.01868	0.181102		3.23394	0.052806	2.87694	0.060921	3.05544	0.1785
VRDPQTL	1.28632	0.096487	1.15016	0.10111	1.21824	0.0680805		1.74115	0.038853	1.74834	0.081956	1.74474	0.0035955
VRDPQTLE	1.74561	0.02841	1.24329	0.085339	1.49445	0.251159		2.67248	0.049783	2.32626	0.146862	2.49937	0.173106
ILDITPCSF	1.3938	0.082427	1.19663	0.057414	1.29521	0.0985835		2.09475	0.037696	1.6889	0.053468	1.89182	0.202924
LDITPCSF	1.47803	0.060303	1.3233	0.052647	1.40067	0.0773635		2.09549	0.017642	1.71754	0.027468	1.90652	0.188977
DITPCSF	1.02255	0.052313	1.03174	0.044746	1.02715	0.0045955		1.37245	0.030014	1.10688	0.046261	1.23966	0.132787
DITPCSFGGVS	2.46626	0.006841	2.21041	0.218336	2.33833	0.127925		3.11081	0.005476	2.46911	0.158204	2.78996	0.32085
CTEVPVAIHADQLTPT	3.0684	0.037466	2.72357	0.011387	2.89599	0.172418		4.08027	0.02765	3.34044	0.163628	3.71035	0.369915
PVAIHADQLTPTW	3.34343	0.095015	3.60649	0.089779	3.47496	0.131528		3.19	0.098258	3.74058	0.066487	3.46529	0.275292
DQLTPTW	1.87064	0.09373	1.76083	0.055758	1.81574	0.0549055		2.07336	0.078435	1.87117	0.036896	1.97227	0.101092
DQLTPTWRVYSTGSNVF	6.08569	0.078699	6.03016	0.202103	6.05792	0.0277635		6.45841	0.050263	6.37112	0.133889	6.41476	0.0436455
RVYSTGSNV	2.61323	0.111814	2.34307	0.061421	2.47815	0.135079		2.79093	0.115654	2.20794	0.045777	2.49943	0.291497
RVYSTGSNVF	2.32408	0.149224	2.28423	0.143765	2.30415	0.0199295		2.68152	0.061099	2.24676	0.0913	2.46414	0.21738
YSTGSNV	1.90334	0.036933	1.6387	0.05435	1.77102	0.132324		2.21523	0.09201	1.52015	0.05344	1.86769	0.347536
YSTGSNVF	1.57397	0.099953	1.56205	0.155416	1.56801	0.005961		1.97893	0.075163	1.53771	0.132487	1.75832	0.220611
VFQTRAGCL	2.04879	0.118701	2.00782	0.038969	2.02831	0.0204825		2.53703	0.052487	2.18451	0.039973	2.36077	0.176257
QTRAGCL	1.87483	0.110002	1.93405	0.107456	1.90444	0.0296105		2.16111	0.047683	2.28367	0.095824	2.22239	0.061277
CDIPIGAGIC	2.20223	0	2.17468	0.063432	2.18846	0.013778		3.08577	0.047	2.82979	0.134761	2.95778	0.127987
IPIGAGIC	2.10426	0.08282	1.77148	0.082139	1.93787	0.166388		2.6495	0.016083	2.23842	0.084964	2.44396	0.205537
IPIGAGICAS	4.125	0.127182	3.55074	0.077357	3.83787	0.287133		5.19149	0.024612	4.63075	0.077357	4.91112	0.28037
PIGAGIC	1.40131	0.015035	1.22427	0.080239	1.31279	0.0885185		1.82377	0	1.61459	0.072964	1.71918	0.104588
ASYQTQTNSPGSASSVASQ	6.36491	0.018459	6.16194	0	6.26342	0.101485		6.95843	0.030553	7.10897	0.097351	7.0337	0.075272
YQTQTNSPGSASSVASQ	4.77125	0.34455	5.30914	0	5.04019	0.268946		5.11485	0.124041	5.34427	0	5.22956	0.114712
IAYTMSL	3.12375	0.058494	3.02923	0.107033	3.07649	0.047259		3.56536	0.149028	3.22605	0.047677	3.3957	0.169654
YTMSLGAE	3.04017	0.112477	2.97003	0.053088	3.0051	0.035071		3.20036	0.086732	3.02397	0.062203	3.11216	0.0881955
TMSLGAENS	2.87779	0.142426	2.78181	0.031175	2.8298	0.0479915		3.0087	0.049134	2.70189	0.067969	2.85529	0.153407
GAENSVA	2.04474	0.017974	2.09863	0.131705	2.07168	0.026944		2.20867	0.085495	2.04339	0.1208	2.12603	0.082642
PTNFTISVTTEILPVS	1.96076	0.056838	1.97395	0.12013	1.96735	0.0065935		2.94309	0.035059	2.64702	0.134351	2.79506	0.148035
TEILPVSM	0.468285	0.091532	0.546576	0.112469	0.507431	0.0391455		0.695498	0.081882	0.545917	0.119548	0.620707	0.0747905
EILPVSM	0.113182	0.005369	0.121605	0.068417	0.117394	0.0042115		0.280123	0.092542	0.213754	0.023167	0.246939	0.0331845
TKTSVDCT	1.72456	0.068845	1.72494	0.085854	1.72475	0.000193		2.31285	0.013466	1.99479	0.0558	2.15382	0.159028
YICGDSTE	1.19588	0.051624	1.02311	0.015622	1.10949	0.086382		1.47213	0.020715	0.984384	0.029916	1.22826	0.243874
LLQYGSF	1.66177	0.053943	2.0521	0.135274	1.85693	0.195162		1.80745	0.065192	1.83422	0.078971	1.82084	0.013387
LNRALTG	1.11292	0.069316	0.861214	0.045061	0.987065	0.125851		2.08697	0.030088	1.80979	0.037616	1.94838	0.138589
NRALTGIA	1.06842	0.048222	1.09215	0.1075	1.08029	0.011868		2.18479	0.056505	1.85429	0.08766	2.01954	0.16525
IAVEQDKNTQEVF	0.902986	0.094519	0.689855	0.110003	0.79642	0.106565		1.95156	0.040077	1.46155	0.195836	1.70656	0.245007
QDKNTQEVF	0.662333	0.009222	0.423158	0.031507	0.542745	0.119587		1.21345	0.095757	0.712648	0.015903	0.963049	0.250401
AQVKQIYKTPPIKD	4.79171	0.193145	5.18652	0.187394	4.98911	0.197408		5.10785	0.051144	4.82182	0.199386	4.96484	0.143016
QVKQIYKTPPIKD	4.87126	0.195348	4.74014	0.080704	4.8057	0.0655595		4.94508	0.060835	4.59585	0.065994	4.77046	0.174618
LLFNKVTL	2.10887	0.081645	2.26473	0.098382	2.1868	0.077931		2.37521	0.272483	2.20594	0.073351	2.29057	0.0846365
LFNKVTL	2.04101	0.105492	2.17959	0.138249	2.1103	0.0692865		2.16257	0.01921	2.06004	0.087812	2.1113	0.051267
LFNKVTLADAGF	3.8589	0.171495	4.01821	0.120658	3.93856	0.079657		4.43899	0.024949	3.7264	0.120633	4.0827	0.356297
FNKVTLADAGF	3.31385	0.185414	3.6725	0.109525	3.49318	0.179323		3.67284	0.04176	3.59853	0.055099	3.63568	0.037155
NKVTLADAGF	3.40453	0.068529	3.69618	0.060277	3.55036	0.145825		3.69653	0.171094	3.44174	0.089637	3.56913	0.127395
FIKQYGDCL	2.63337	0.050444	2.73626	0.113361	2.68482	0.051448		2.64321	0.026831	2.58882	0.075556	2.61601	0.0271915
IKQYGDC	1.92358	0.051863	1.86384	0.099157	1.89371	0.029869		1.89892	0.065889	1.68643	0.139026	1.79268	0.106248
IKQYGDCL	2.0148	0	2.13567	0.066416	2.07524	0.060439		2.17625	0.057382	1.95281	0.061456	2.06453	0.111723
IKQYGDCLGDIAARD	4.60948	0.088972	5.19704	0.166974	4.90326	0.29378		5.17941	0.029979	5.09119	0.099847	5.1353	0.0441065
GDIAARD	2.18389	0.09241	2.44751	0.080481	2.3157	0.131811		2.41876	0.02953	2.21528	0.076168	2.31702	0.101742
AQKFNGL	1.61016	0.053951	1.56231	0.156452	1.58624	0.0239205		1.92756	0.049733	1.45282	0.081912	1.69019	0.237368
LTVLPPLLT	2.30404	0.073547	2.49879	0.205811	2.40141	0.0973755		2.60474	0.047253	2.46565	0.163517	2.5352	0.069542
TVLPPLL	1.22995	0.032273	1.25395	0.031487	1.24195	0.0120045		1.40829	0.024833	1.30107	0.046742	1.35468	0.0536055
TVLPPLLT	1.63992	0.051239	1.95537	0.094787	1.79764	0.157725		1.87635	0.019766	1.92462	0.080686	1.90049	0.024136
IAQYTSAL	1.3605	0.045694	1.39898	0.079057	1.37974	0.019241		2.34316	0.040821	2.35128	0.098795	2.34722	0.004059
LLAGTITSGW	2.44261	0.029805	2.84874	0.02986	2.64568	0.203063		2.69416	0.037897	2.56273	0.062017	2.62845	0.065712
LAGTITSGWTFGAGAA	5.85792	0.058889	6.37971	0.15123	6.11881	0.26089		6.20008	0.09273	6.05625	0.261885	6.12817	0.071918
WTFGAGAALQIPF	1.15202	0.084837	1.18004	0.022474	1.16603	0.014007		1.46282	0.135111	1.91868	0.127425	1.69075	0.227933
GAGAALQIPF	1.45413	0.084343	1.05922	0.115131	1.25668	0.197459		2.61289	0.059234	2.28401	0.129014	2.44845	0.16444
AALQIPFA	2.66333	0.068527	3.15993	0.115102	2.91163	0.248304		2.83596	0.071027	2.93268	0.088603	2.88432	0.048362
LQIPFAMQ	2.98304	0.051473	3.48494	0.03556	3.23399	0.250952		2.82208	0.02027	2.73761	0.191835	2.77984	0.042235
MAYRFNGIGVTQNVL	6.05127	0.146391	5.69166	0.187744	5.87147	0.179804		6.03424	0	5.83579	0.082262	5.93501	0.0992275
AYRFNGIGVTQNVL	4.65416	0.112893	3.99053	0.02761	4.32234	0.331817		5.79885	0.030109	6.15939	0.094175	5.97912	0.180269
YRFNGIGVTQNVL	4.84516	0.141084	4.32759	0.054283	4.58638	0.258782		5.0693	0.004938	4.69447	0.097522	4.88189	0.187412
RFNGIGVTQNVL	4.10576	0.228858	3.8978	0.111873	4.00178	0.10398		4.19784	0.09431	4.058	0.106113	4.12792	0.0699215
NGIGVTQNVL	3.86812	0.114988	3.43361	0.092287	3.65087	0.217256		3.54547	0.048603	3.23291	0.115945	3.38919	0.156281
IGVTQNVL	2.87059	0.088674	2.39746	0.118067	2.63403	0.236565		2.90068	0.050273	2.64169	0.211717	2.77119	0.129494
YENQKLIA	1.91543	0.01292	2.07423	0.180456	1.99483	0.0793965		5.77545	0.046466	4.89947	0.13984	5.33746	0.437987
IANQFNSAIGKIQDSL	4.34263	0.080416	4.20232	0.234208	4.27248	0.070152		4.36969	0.097893	4.10762	0.064118	4.23866	0.131034
FNSAIGKIQDSLSSTASAL	7.89109	0	7.70486	0.168857	7.79798	0.093119		7.61774	0.069561	7.74091	0.162348	7.67932	0.0615855
NSAIGKIQDSL	3.71184	0.040007	3.84229	0.063869	3.77707	0.0652235		3.99837	0.061052	4.0827	0.052708	4.04054	0.0421675
NSAIGKIQDSLSSTASAL	7.58432	0.0479	7.72876	0.162348	7.65654	0.07222		8.86134	0.204513	8.83637	0.106937	8.84885	0.0124855
GKIQDSLSSTAS	4.64539	0.155514	4.53758	0.040909	4.59148	0.0539095		3.72703	0.099984	3.54899	0.209	3.63801	0.0890215
GKLQDVVNQNAQALNT	7.73228	0.201657	8.09875	0.187888	7.91552	0.183234		7.24256	0.073913	7.06338	0.180524	7.15297	0.08959
VVNQNAQAL	3.43506	0.094039	3.60993	0.209	3.52249	0.087434		2.231	0.227806	2.14101	0.149997	2.18601	0.0449945
VKQLSSNF	2.07783	0.094974	2.39752	0.164695	2.23768	0.159844		2.72493	0.030595	2.54779	0.096841	2.63636	0.0885735
FGAISSVL	2.47832	0.013302	2.81412	0.095409	2.64622	0.167901		2.19584	0.033444	2.51941	0.095584	2.35762	0.161788
GAISSVL	1.98815	0.028507	2.46904	0.108998	2.22859	0.240444		2.21485	0.04232	2.1768	0.103329	2.19582	0.019025
ILSRLDPPEAE	2.04091	0.002759	2.57726	0.103329	2.30908	0.268173		1.75063	0.029555	1.60141	0.035936	1.67602	0.0746095
SRLDPPEA	1.70845	0.022513	1.78272	0.050549	1.74559	0.037134		1.89054	0.031752	1.76436	0.117881	1.82745	0.063088
SRLDPPEAE	1.78272	0.060712	2.1195	0.120914	1.95111	0.168386		3.23201	0.033414	3.18213	0.177159	3.20707	0.0249385
IDRLITGRL	2.73432	0.075146	3.22203	0.180582	2.97818	0.243856		2.99009	0.040023	2.83668	0.1816	2.91338	0.0767055
DRLITGRL	2.59099	0.067558	3.0816	0.191306	2.83629	0.245306		3.08358	0.027304	2.83397	0.145765	2.95877	0.124804
SLQTYVTQQLIRAAEIR	2.14855	0.144869	2.06343	0.145765	2.10599	0.042564		2.0789	0.167799	1.87445	0.071553	1.97667	0.102226
IRASANL	1.08199	0.049248	0.99221	0.137055	1.0371	0.0448895		0.940622	0.179569	0.784153	0.045844	0.862387	0.0782345
CVLGQSKRVDFCGKG	3.07895	0.16126	3.4067	0.149	3.24282	0.163878		3.19708	0.046708	2.94159	0.084021	3.06933	0.127747
LGQSKRVDF	1.77942	0.107888	2.00222	0.103015	1.89082	0.111401		2.2184	0.068681	2.04251	0.210669	2.13045	0.0879425
GQSKRVDF	1.54311	0.030101	1.76658	0.235101	1.65484	0.111735		1.60616	0.016021	1.6086	0.237447	1.60738	0.0012185
CGKGYHL	0.39016	0.07403	0.408562	0.06871	0.399361	0.009201		0.518499	0.055352	0.395614	0.112401	0.457057	0.0614425
PQSAPHGVVFL	0.165866	0.065817	0.210123	0.081647	0.187995	0.0221285		0.351532	0.026022	0.228848	0.070938	0.29019	0.061342
REGVFVSNG	2.03724	0.093489	1.88968	0.029246	1.96346	0.0737805		2.43425	0.001818	2.25084	0.029246	2.34254	0.091707
FVTQRNFYEPQIITT	2.36417	0.115754	2.05467	0.095516	2.20942	0.154749		2.66666	2.27374e-13	2.95806	0.040859	2.81236	0.145699
FYEPQIIT	0.849953	0.178472	1.22448	0.034321	1.03722	0.187263		1.37413	0	1.38181	0.058736	1.37797	0.003841
FYEPQIITT	1.34328	0.013264	1.40907	0.123688	1.37618	0.032896		1.9266	0.184786	1.64407	0.133138	1.78533	0.141261
FVSGNCD	1.36475	0.052988	1.04049	0.122892	1.20262	0.162133		1.43521	0.100012	1.20531	0.110495	1.32025	0.11495
SVVNIQKEIDRL	5.12937	0.177743	5.16617	0.01201	5.14777	0.0184015		5.56105	0.039721	5.31802	0.191574	5.43953	0.121514
VNIQKEIDRLNE	5.34156	0.147687	5.34929	0.228196	5.34542	0.0038615		5.76428	0.025207	5.35023	0.102679	5.55725	0.207028
NIQKEIDRL	4.517	0.196915	4.99528	0	4.75614	0.239141		4.87275	0.05841	4.90141	0.166615	4.88708	0.014327
IQKEIDRLNE	2.82003	0.056386	3.39602	0.081075	3.10802	0.287995		2.99238	0.099406	3.20413	0.151219	3.09825	0.105875
WSHPQFE	0.642591	0.050612	0.687689	0.195267	0.66514	0.022549		0.691187	0.030344	0.833685	0.146078	0.762436	0.071249
WSHPQFEKGGGSGGGSGGSA	3.93661	0.019676	3.90563	0.027551	3.92112	0.0154895		3.91906	0.098628	3.72244	0.027551	3.82075	0.0983085

## Sheet: Table S7
Table S7: List of peptides of S with deuterium exchange for a fully deuterated state to determine deuterium back-exchange
S.No.	Peptide	MEA	m100%	BackExchange %
1	21-36	13	9.28	20.6838
2	36-43	6	3.89	27.963	BackExchange% = (1-(m100%/MEA*Dfrac))*100
3	49-56	7	4.58	27.3016
4	111-117	6	2.83	47.5926
5	170-176	5	2.27	49.5556		m100% = deuterium exchange for maximally deuterated sample
6	179-191	12	7.34	32.037		MEA = Maximally exchangeable amides available for peptide
7	214-221	6	4.19	22.4074		Dfrac = 0.9 (90% final D2O concentration)
8	266-276	9	4.57	43.5802
9	306-313	7	3.49	44.6032
10	306-317	11	6.14	37.9798
11	311-322	10	6.66	26
12	354-360	5	2.53	43.7778
13	400-406	6	3.11	42.4074
14	407-420	12	5.79	46.3889
15	407-421	13	6.31	46.0684
16	422-431	8	4.87	32.3611
17	444-452	8	5.45	24.3056
18	446-460	13	9.9	15.3846
19	495-510	13	7.08	39.4872
20	495-512	15	8.44	37.4815
21	542-552	10	4.41	51
22	575-583	7	3.53	43.9683
23	576-582	5	2.29	49.1111
24	627-633	5	2.63	41.5556
25	627-635	7	4.16	33.9683
26	646-668	21	10.95	42.0635
27	725-732	6	2.75	49.0741
28	765-772	7	3.24	48.5714
29	824-833	9	6.46	20.2469
30	825-834	9	6.38	21.2346
31	835-846	11	8.2	17.1717
32	870-878	8	6.14	14.7222
33	879-886	7	4.25	32.5397
34	906-917	11	7.42	25.0505
35	920-935	15	9.46	29.9259
36	937-944	7	4.1	34.9206
37	938-951	13	8.84	24.4444
38	952-962	10	7.07	21.4444
39	963-975	12	7.67	28.9815
40	1019-1025	6	3.11	42.4074
41	1065-1073	8	4.05	43.75
42	1149-1160	11	7.09	28.3838
43	1176-1187	11	7.3	26.2626

## Sheet: Table S1 (RFU)
Table S1: RFU data for S protein at indicated labeling times
				Spike (1 min)			Spike (10 min)
Start	End	Sequence	MaxUptake	Uptake	Uptake SD		Uptake	Uptake SD
21	31	RTQLPPAYTNS	8	0.1661	0.00434		0.2401	0.007221
32	42	FTRGVYYPDKV	9	0.1466	0.003285		0.1993	0.002367
32	48	FTRGVYYPDKVFRSSVL	15	0.1504	0.002249		0.2267	0.001333
33	42	TRGVYYPDKV	8	0.2302	0.00609		0.2584	0.005404
36	48	VYYPDKVFRSSVL	11	0.3069	0.003627		0.3151	0.003504
49	55	HSTQDLF	6	0.0886	0.00299		0.1497	0.00367
60	83	SNVTWFHAIHVSGTNGTKRFDNPV	22	0.1768	0.005619		0.2014	0.004672
85	91	PFNDGVY	5	0.0577	0.004367		0.1239	0.008594
92	103	FASTEKSNIIRG	11	0.1699	0.00263		0.2271	0.001689
92	106	FASTEKSNIIRGWIF	14	0.1719	0.003054		0.2544	0.001834
92	110	FASTEKSNIIRGWIFGTTL	18	0.16	0.002444		0.2233	0.004084
93	103	ASTEKSNIIRG	10	0.086	0.002397		0.1279	0.00586
94	103	STEKSNIIRG	9	0.1766	0.001684		0.2456	0.001548
95	103	TEKSNIIRG	8	0.1079	0.00169		0.2155	0.002804
104	110	WIFGTTL	6	0.1172	0.002291		0.2447	0.005472
107	117	GTTLDSKTQSL	10	0.115	0.003619		0.2022	0.018076
111	117	DSKTQSL	6	0.1095	0.004181		0.1486	0.00659
111	118	DSKTQSLL	7	0.0979	0.00181		0.1006	0.000545
136	143	CNDPFLGV	6	0.3034	0.006834		0.3605	0.009962
169	176	EYVSQPFL	6	0.417	0.009812		0.4315	0.004328
170	176	YVSQPFL	5	0.3667	0.004063		0.381	0.001775
177	186	MDLEGKQGNF	9	0.2326	0.009169		0.2348	0.010066
177	191	MDLEGKQGNFKNLRE	14	0.2008	0.012665		0.257	0.007739
178	191	DLEGKQGNFKNLRE	13	0.1974	0.005951		0.2584	0.004816
180	191	EGKQGNFKNLRE	11	0.1546	0.006297		0.2353	0.004069
181	191	GKQGNFKNLRE	10	0.2122	0.005475		0.2938	0.009515
184	191	GNFKNLRE	7	0.1893	0.00481		0.279	0.00633
192	199	FVFKNIDG	7	0.1764	0.001308		0.1959	0.005567
192	200	FVFKNIDGY	8	0.1614	0.005677		0.217	0.003354
192	201	FVFKNIDGYF	9	0.1675	0.002208		0.2353	0.001966
193	201	VFKNIDGYF	8	0.1908	0.007197		0.2449	0.007141
194	200	FKNIDGY	6	0.1986	0.003627		0.2668	0.006928
194	201	FKNIDGYF	7	0.1854	0.003072		0.2622	0.002146
195	201	KNIDGYF	6	0.1751	0.004403		0.2719	0.004286
200	212	YFKIYSKHTPINL	11	0.1313	0.004349		0.1369	0.005268
201	212	FKIYSKHTPINL	10	0.1374	0.00217		0.1515	0.001819
213	220	VRDLPQGF	6	0.2986	0.005794		0.3037	0.003783
213	223	VRDLPQGFSAL	9	0.256	0.008291		0.2651	0.005454
213	228	VRDLPQGFSALEPLVD	13	0.1734	0.001238		0.2509	0.007637
221	228	SALEPLVD	6	0.0546	0.003914		0.2091	0.007461
221	229	SALEPLVDL	7	0.0513	0.003334		0.2051	0.007956
242	264	LALHRSYLTPGDSSSGWTAGAAA	21	0.3072	0.005489		0.3252	0.003782
243	255	ALHRSYLTPGDSS	11	0.0423	0.00398		0.0811	0.001409
243	257	ALHRSYLTPGDSSSG	13	0.169	0.004211		0.1624	0.004154
245	257	HRSYLTPGDSSSG	11	0.193	0.00453		0.2021	0.003851
245	264	HRSYLTPGDSSSGWTAGAAA	18	0.3098	0.005309		0.3	0.002216
245	265	HRSYLTPGDSSSGWTAGAAAY	19	0.2874	0.001333		0.2869	0.002387
265	271	YYVGYLQ	6	0.0841	0.004163		0.1633	0.004942
265	276	YYVGYLQPRTFL	10	0.096	0.002316		0.1697	0.002334
266	276	YVGYLQPRTFL	9	0.0973	0.004749		0.1581	0.004647
267	276	VGYLQPRTFL	8	0.0983	0.004296		0.1694	0.004289
289	303	VDCALDPLSETKCTL	13	0.2009	0.005929		0.3392	0.004489
291	299	CALDPLSET	7	0.2289	0.006184		0.3285	0.006849
291	301	CALDPLSETKC	9	0.1956	0.007609		0.3163	0.001655
291	303	CALDPLSETKCTL	11	0.1795	0.003886		0.2887	0.000955
294	303	DPLSETKCTL	8	0.2524	0.007014		0.4088	0.003232
295	303	PLSETKCTL	7	0.1744	0.014532		0.2693	0.00578
304	313	KSFTVEKGIY	9	0.2872	0.00529		0.3505	0.006474
304	317	KSFTVEKGIYQTSN	13	0.3003	0.007525		0.3731	0.006898
304	318	KSFTVEKGIYQTSNF	14	0.3237	0.005871		0.379	0.003656
306	313	FTVEKGIY	7	0.3091	0.005434		0.3741	0.007551
306	317	FTVEKGIYQTSN	11	0.3347	0.017224		0.4012	0.011218
306	318	FTVEKGIYQTSNF	12	0.3167	0.006268		0.3861	0.006591
310	318	KGIYQTSNF	8	0.236	0.005219		0.3156	0.007195
318	325	FRVQPTES	6	0.3364	0.000978		0.3517	0.006763
318	326	FRVQPTESI	7	0.315	0.010101		0.4218	0.014023
324	334	ESIVRFPNITN	9	0.1233	0.023617		0.1815	0.025334
327	338	VRFPNITNLCPF	9	0.4328	0.004106		0.5463	0.003805
337	348	PFGEVFNATRFA	10	0.0516	0.001877		0.1751	0.005179
340	359	EVFNATRFASVYAWNRKRIS	19	0.1241	0.001482		0.1846	0.007008
348	361	ASVYAWNRKRISNC	13	0.1289	0.003124		0.2108	0.007587
351	361	YAWNRKRISNC	10	0.1259	0.00692		0.1791	0.009614
356	375	KRISNCVADYSVLYNSASFS	19	0.102	0.004032		0.1365	0.002772
375	387	STFKCYGVSPTKL	11	0.341	0.005782		0.3686	0.00255
377	387	FKCYGVSPTKL	9	0.3498	0.009762		0.3858	0.00949
378	387	KCYGVSPTKL	8	0.3647	0.004396		0.3911	0.005121
386	407	KLNDLCFTNVYADSFVIRGDEV	21	0.1462	0.003681		0.308	0.001019
393	399	TNVYADS	6	0.0485	0.001179		0.1425	0.006827
393	400	TNVYADSF	7	0.0413	0.003551		0.1106	0.010307
400	406	FVIRGDE	6	0.033	0.003957		0.064	0.002752
400	416	FVIRGDEVRQIAPGQTG	15	0.2555	0.000942		0.2841	0.002823
400	421	FVIRGDEVRQIAPGQTGKIADY	20	0.1712	0.001433		0.1777	0.002958
400	422	FVIRGDEVRQIAPGQTGKIADYN	21	0.1228	0.001512		0.1966	0.002222
401	420	VIRGDEVRQIAPGQTGKIAD	18	0.1529	0.003424		0.2372	0.005301
401	421	VIRGDEVRQIAPGQTGKIADY	19	0.1261	0.00388		0.2008	0.005784
402	413	IRGDEVRQIAPG	10	0.141	0.00726		0.2261	0.00367
407	420	VRQIAPGQTGKIAD	12	0.1718	0.003808		0.2585	0.002569
407	421	VRQIAPGQTGKIADY	13	0.1543	0.004703		0.2467	0.003031
407	422	VRQIAPGQTGKIADYN	14	0.1509	0.001761		0.2401	0.001938
412	420	PGQTGKIAD	7	0.2036	0.005354		0.2948	0.007331
421	429	YNYKLPDDF	7	0.0783	0.002912		0.1322	0.002773
422	431	NYKLPDDFTG	8	0.0855	0.00223		0.1141	0.004836
423	429	YKLPDDF	5	0.1122	0.004056		0.1423	0.005048
423	431	YKLPDDFTG	7	0.0972	0.00304		0.1161	0.003163
425	431	LPDDFTG	5	0.0899	0.007946		0.1143	0.015798
432	441	CVIAWNSNNL	9	0.2251	0.001761		0.239	0.000828
433	448	VIAWNSNNLDSKVGGN	15	0.2731	0.001724		0.2836	0.002691
434	441	IAWNSNNL	7	0.0553	0.006832		0.0769	0.008211
442	449	DSKVGGNY	7	0.3352	0.002049		0.3342	0.005404
442	452	DSKVGGNYNYL	10	0.3359	0.004294		0.366	0.005878
444	452	KVGGNYNYL	8	0.32	0.004214		0.3678	0.007597
453	467	YRLFRKSNLKPFERD	13	0.0822	0.009489		0.175	0.009133
456	467	FRKSNLKPFERD	10	0.0793	0.004642		0.2003	0.007351
456	469	FRKSNLKPFERDIS	12	0.1672	0.003522		0.2816	0.008321
456	470	FRKSNLKPFERDIST	13	0.1747	0.001297		0.2608	0.001358
456	471	FRKSNLKPFERDISTE	14	0.2189	0.008038		0.3106	0.008787
471	486	EIYQAGSTPCNGVEGF	14	0.3122	0.008394		0.3154	0.008227
471	487	EIYQAGSTPCNGVEGFN	15	0.3274	0.003484		0.3291	0.009478
472	486	IYQAGSTPCNGVEGF	13	0.3179	0.009145		0.3109	0.008235
472	487	IYQAGSTPCNGVEGFN	14	0.329	0.000553		0.3394	0.005835
476	498	GSTPCNGVEGFNCYFPLQSYGFQ	20	0.3953	0.005802		0.4257	0.007171
477	500	STPCNGVEGFNCYFPLQSYGFQPT	20	0.3828	0.008209		0.4222	0.008667
479	486	PCNGVEGF	6	0.3566	0.010578		0.3547	0.008193
487	494	NCYFPLQS	6	0.2714	0.008466		0.383	0.010049
487	495	NCYFPLQSY	7	0.2372	0.003285		0.3924	0.00532
488	495	CYFPLQSY	6	0.1927	0.007428		0.3795	0.004746
488	496	CYFPLQSYG	7	0.2281	0.022882		0.3959	0.006373
488	502	CYFPLQSYGFQPTNG	12	0.2496	0.007729		0.3411	0.005961
490	512	FPLQSYGFQPTNGVGYQPYRVVV	19	0.2464	0.001335		0.2884	0.004191
491	510	PLQSYGFQPTNGVGYQPYRV	16	0.2965	0.003245		0.3328	0.00214
491	512	PLQSYGFQPTNGVGYQPYRVVV	18	0.2597	0.002773		0.2903	0.004229
495	510	YGFQPTNGVGYQPYRV	13	0.2828	0.003005		0.2838	0.002643
495	512	YGFQPTNGVGYQPYRVVV	15	0.2393	0.006439		0.2401	0.003287
495	513	YGFQPTNGVGYQPYRVVVL	16	0.24	0.008004		0.2699	0.003685
496	510	GFQPTNGVGYQPYRV	12	0.2802	0.002599		0.2782	0.003512
503	510	VGYQPYRV	6	0.1785	0.006992		0.1886	0.000635
514	533	SFELLHAPATVCGPKKSTNL	17	0.2329	0.004599		0.2599	0.003966
515	533	FELLHAPATVCGPKKSTNL	16	0.2187	0.005001		0.2458	0.006699
516	533	ELLHAPATVCGPKKSTNL	15	0.1989	0.006751		0.2159	0.016627
517	532	LLHAPATVCGPKKSTN	13	0.1678	0.015276		0.2043	0.005551
517	533	LLHAPATVCGPKKSTNL	14	0.2088	0.012254		0.2344	0.011145
518	533	LHAPATVCGPKKSTNL	13	0.2141	0.016594		0.2476	0.00778
521	533	PATVCGPKKSTNL	10	0.2324	0.006415		0.2586	0.001259
534	541	VKNKCVNF	7	0.1201	0.001814		0.2584	0.008599
542	552	NFNGLTGTGVL	10	0.1639	0.006578		0.3017	0.000511
543	555	FNGLTGTGVLTES	12	0.1433	0.003323		0.3011	0.007272
544	552	NGLTGTGVL	8	0.2951	0.003492		0.3011	0.002907
546	552	LTGTGVL	6	0.1661	0.002129		0.3296	0.001772
553	564	TESNKKFLPFQQ	10	0.3685	0.002487		0.3625	0.004207
553	565	TESNKKFLPFQQF	11	0.3128	0.004715		0.3022	0.004555
553	568	TESNKKFLPFQQFGRD	14	0.2816	0.003455		0.2877	0.009743
555	568	SNKKFLPFQQFGRD	12	0.3162	0.002943		0.3228	0.005967
569	575	IADTTDA	6	0.213	0.003324		0.2272	0.000955
569	581	IADTTDAVRDPQT	11	0.2218	0.001441		0.3346	0.001085
569	582	IADTTDAVRDPQTL	12	0.2105	0.002079		0.3272	0.006905
569	583	IADTTDAVRDPQTLE	13	0.2276	0.007167		0.3824	0.002609
575	582	AVRDPQTL	6	0.2409	0.002725		0.3922	0.001428
575	583	AVRDPQTLE	7	0.2509	0.002235		0.452	0.005895
576	582	VRDPQTL	5	0.27	0.00625		0.4028	0.003654
576	583	VRDPQTLE	6	0.2465	0.001187		0.4381	0.003991
584	592	ILDITPCSF	7	0.1827	0.004874		0.3024	0.007785
584	596	ILDITPCSFGGVS	11	0.2375	0.00228		0.3417	0.002296
585	592	LDITPCSF	6	0.2348	0.005235		0.3622	0.005314
586	592	DITPCSF	5	0.2052	0.001726		0.2881	0.002205
586	596	DITPCSFGGVS	9	0.2746	0.005716		0.348	0.007477
599	615	TPGTNTSNQVAVLYQDV	15	0.2378	0.00731		0.2508	0.004014
617	632	CTEVPVAIHADQLTPT	13	0.1521	0.003604		0.1721	0.007295
621	633	PVAIHADQLTPTW	10	0.2837	0.009387		0.2806	0.00428
627	633	DQLTPTW	5	0.3926	0.004147		0.4181	0.008066
627	635	DQLTPTWRV	7	0.4566	0.00616		0.4709	0.006522
627	643	DQLTPTWRVYSTGSNVF	15	0.4471	0.004909		0.49	0.006224
634	642	RVYSTGSNV	8	0.341	0.002609		0.3609	0.00308
634	643	RVYSTGSNVF	9	0.2703	0.005724		0.2994	0.009663
636	642	YSTGSNV	6	0.3427	0.009174		0.3659	0.011258
636	643	YSTGSNVF	7	0.2334	0.003384		0.2728	0.007037
642	650	VFQTRAGCL	8	0.2645	0.003817		0.3279	0.003559
643	650	FQTRAGCL	7	0.2526	0.00328		0.3337	0.008886
644	650	QTRAGCL	6	0.2972	0.001944		0.37	0.005534
648	665	GCLIGAEHVNNSYECDIP	16	0.0577	0.006031		0.0806	0.000924
662	671	CDIPIGAGIC	8	0.2742	0.007398		0.3796	0.010758
664	671	IPIGAGIC	6	0.333	0.006796		0.4242	0.004146
664	673	IPIGAGICAS	8	0.2611	0.004111		0.345	0.008013
665	671	PIGAGIC	5	0.4903	0.006744		0.628	0.001758
672	686	ASYQTQTNSPGSASS	13	0.3683	0.001112		0.3899	0.006884
672	690	ASYQTQTNSPGSASSVASQ	17	0.3945	0.003324		0.3961	0.001622
672	692	ASYQTQTNSPGSASSVASQSI	19	0.3533	0.001622		0.3759	0.003473
672	694	ASYQTQTNSPGSASSVASQSIIA	21	0.4051	0.003693		0.4108	0.009148
673	690	SYQTQTNSPGSASSVASQ	16	0.3082	0.007114		0.3341	0.006237
674	690	YQTQTNSPGSASSVASQ	15	0.3068	0.001024		0.3439	0.007195
674	694	YQTQTNSPGSASSVASQSIIA	19	0.4306	0.000155		0.4432	0.002066
675	690	QTQTNSPGSASSVASQ	14	0.3916	0.00407		0.3998	0.001046
675	694	QTQTNSPGSASSVASQSIIA	18	0.3703	0.002487		0.4094	0.007144
688	695	ASQSIIAY	7	0.102	0.006633		0.2405	0.009338
693	699	IAYTMSL	6	0.5517	0.003416		0.5733	0.005304
695	702	YTMSLGAE	7	0.4561	0.003641		0.4494	0.005872
696	704	TMSLGAENS	8	0.3712	0.001112		0.3795	0.002064
700	706	GAENSVA	6	0.3624	0.001868		0.3593	0.003708
715	730	PTNFTISVTTEILPVS	13	0.1547	0.00112		0.2476	0.004126
724	731	TEILPVSM	6	0.0943	0.005682		0.1301	0.006148
725	731	EILPVSM	5	0.0339	0.00473		0.0702	0.010082
728	739	PVSMTKTSVDCT	10	0.3078	0.001855		0.4033	0.001968
732	739	TKTSVDCT	7	0.2403	0.000671		0.3338	0.002589
732	741	TKTSVDCTMY	9	0.2337	0.00512		0.4243	0.005828
740	748	MYICGDSTE	8	0.2579	0.003093		0.3551	0.007256
741	748	YICGDSTE	7	0.1953	0.005158		0.2319	0.002678
742	748	ICGDSTE	6	0.2062	0.004039		0.2214	0.006242
753	759	LLQYGSF	6	0.3196	0.008801		0.3252	0.00469
763	769	LNRALTG	6	0.177	0.00336		0.3573	0.003547
764	771	NRALTGIA	7	0.1504	0.001198		0.3169	0.00262
770	780	IAVEQDKNTQE	10	0.0646	0.002586		0.2078	0.001816
770	781	IAVEQDKNTQEV	11	0.0594	0.004609		0.1888	0.002215
770	782	IAVEQDKNTQEVF	12	0.0706	0.001541		0.1709	0.00063
774	782	QDKNTQEVF	8	0.0639	0.001482		0.17	0.002023
781	802	VFAQVKQIYKTPPIKDFGGFNF	19	0.1462	0.002107		0.1897	0.008333
783	796	AQVKQIYKTPPIKD	11	0.4487	0.00617		0.4562	0.009463
784	796	QVKQIYKTPPIKD	10	0.4961	0.010584		0.4869	0.002666
800	815	FNFSQILPDPSKPSKR	12	0.2531	0.005881		0.2671	0.009124
821	828	LLFNKVTL	7	0.3265	0.006301		0.3351	0.007607
822	828	LFNKVTL	6	0.3721	0.003569		0.3563	0.007523
822	833	LFNKVTLADAGF	11	0.3591	0.004869		0.371	0.0034
823	832	FNKVTLADAG	9	0.3905	0.006128		0.3753	0.00786
823	833	FNKVTLADAGF	10	0.3395	0.005227		0.3354	0.007117
824	833	NKVTLADAGF	9	0.4044	0.007318		0.393	0.010199
833	841	FIKQYGDCL	8	0.3302	0.005268		0.3348	0.005318
834	840	IKQYGDC	6	0.3132	0.00947		0.3154	0.00207
834	841	IKQYGDCL	7	0.319	0.005498		0.3178	0.005235
834	848	IKQYGDCLGDIAARD	14	0.3758	0.001782		0.3651	0.003442
842	848	GDIAARD	6	0.412	0.002171		0.4129	0.002239
848	862	DLICAQKFNGLTVLP	13	0.1441	0.008479		0.2327	0.002349
852	858	AQKFNGL	6	0.2703	0.00804		0.3232	0.002222
858	865	LTVLPPLL	5	0.347	0.007801		0.3472	0.004285
858	866	LTVLPPLLT	6	0.4375	0.003635		0.435	0.005295
859	865	TVLPPLL	4	0.3157	0.006779		0.3327	0.004653
859	866	TVLPPLLT	5	0.3787	0.002235		0.3818	0.007831
870	877	IAQYTSAL	7	0.2036	0.005398		0.3464	0.007082
877	885	LLAGTITSG	8	0.4525	0.006723		0.4784	0.004565
877	886	LLAGTITSGW	9	0.2871	0.004672		0.2879	0.002229
878	885	LAGTITSG	7	0.3937	0.003821		0.4124	0.006251
878	891	LAGTITSGWTFGAG	13	0.5203	0.009779		0.5382	0.000627
878	893	LAGTITSGWTFGAGAA	15	0.395	0.000802		0.4183	0.001964
886	893	WTFGAGAA	7	0.4313	0.004098		0.4473	0.006648
886	898	WTFGAGAALQIPF	11	0.0816	0.00468		0.1457	0.004771
889	898	GAGAALQIPF	8	0.1643	0.004035		0.3318	0.006021
892	899	AALQIPFA	6	0.5146	0.006067		0.504	0.010487
892	901	AALQIPFAMQ	8	0.5156	0.003827		0.5149	0.005035
892	902	AALQIPFAMQM	9	0.541	0.004731		0.5462	0.004604
894	901	LQIPFAMQ	6	0.4281	0.00721		0.4407	0.004944
894	902	LQIPFAMQM	7	0.4918	0.003393		0.5082	0.003535
902	916	MAYRFNGIGVTQNVL	14	0.4127	0.005699		0.5343	0.003739
903	916	AYRFNGIGVTQNVL	13	0.3482	0.002594		0.4424	0.005241
904	916	YRFNGIGVTQNVL	12	0.3936	0.00438		0.4951	0.001628
905	916	RFNGIGVTQNVL	11	0.0202	0.00176		0.0475	0.006787
907	913	NGIGVTQ	6	0.3634	0.002059		0.4596	0.008135
907	916	NGIGVTQNVL	9	0.4177	0.004613		0.5154	0.007186
909	916	IGVTQNVL	7	0.395	0.002395		0.4864	0.002439
917	924	YENQKLIA	7	0.2887	0.00394		0.4095	0.009257
923	930	IANQFNSA	7	0.1061	0.006878		0.2939	0.00391
923	938	IANQFNSAIGKIQDSL	15	0.2929	0.00212		0.4019	0.005718
923	941	IANQFNSAIGKIQDSLSST	18	0.181	0.002017		0.1793	0.009465
923	945	IANQFNSAIGKIQDSLSSTASAL	22	0.409	0.00805		0.4797	0.002116
925	938	NQFNSAIGKIQDSL	13	0.3285	0.004593		0.4373	0.002643
927	945	FNSAIGKIQDSLSSTASAL	18	0.456	0.003815		0.4932	0.004743
928	936	NSAIGKIQD	8	0.3277	0.000913		0.3985	0.001705
928	938	NSAIGKIQDSL	10	0.3755	0.004638		0.4249	0.004103
928	945	NSAIGKIQDSLSSTASAL	17	0.4601	0.004741		0.4886	0.00621
931	938	IGKIQDSL	7	0.3077	0.004198		0.3337	0.005339
932	943	GKIQDSLSSTAS	11	0.4111	0.006094		0.39	0.006407
937	945	SLSSTASAL	8	0.4175	0.002127		0.4118	0.00073
939	945	SSTASAL	6	0.4108	0.00073		0.3984	0.006168
939	956	SSTASALGKLQDVVNQNA	17	0.5084	0.005602		0.5253	0.002874
939	961	SSTASALGKLQDVVNQNAQALNT	22	0.5536	0.008787		0.5797	0.003784
946	954	GKLQDVVNQ	8	0.4289	0.001407		0.5121	0.008513
946	961	GKLQDVVNQNAQALNT	15	0.5404	0.003908		0.582	0.002296
951	959	VVNQNAQAL	8	0.4777	0.004241		0.469	0.034628
951	961	VVNQNAQALNT	10	0.463	0.003908		0.4739	0.004313
960	970	NTLVKQLSSNF	10	0.435	0.001738		0.4564	0.001633
962	969	LVKQLSSN	7	0.4068	0.003726		0.4013	0.009157
962	970	LVKQLSSNF	8	0.3807	0.004663		0.378	0.001448
962	974	LVKQLSSNFGAIS	12	0.3386	0.003232		0.3315	0.002244
962	977	LVKQLSSNFGAISSVL	15	0.4468	0.004985		0.4447	0.008964
963	970	VKQLSSNF	7	0.446	0.006393		0.4411	0.003035
964	970	KQLSSNF	6	0.4874	0.002491		0.4822	0.009923
970	977	FGAISSVL	7	0.4033	0.00765		0.3822	0.005113
971	977	GAISSVL	6	0.3806	0.007391		0.3768	0.004543
980	990	ILSRLDPPEAE	8	0.2817	0.002449		0.2803	0.004686
980	992	ILSRLDPPEAEVQ	10	0.3573	0.002313		0.3454	0.012596
982	989	SRLDPPEA	5	0.3653	0.005945		0.3538	0.004442
982	990	SRLDPPEAE	6	0.3275	0.002968		0.319	0.006555
982	992	SRLDPPEAEVQ	8	0.4121	0.003418		0.4008	0.015342
990	996	EVQIDRL	6	0.3856	0.01562		0.3736	0.003863
993	1001	IDRLITGRL	8	0.3616	0.004949		0.3985	0.004496
994	1001	DRLITGRL	7	0.3778	0.004185		0.4251	0.019063
997	1006	ITGRLQSLQT	9	0.2026	0.007565		0.3585	0.027444
1018	1024	IRASANL	6	0.1879	0.005785		0.3836	0.007237
1025	1031	AATKMSE	6	0.0752	0.005354		0.1767	0.006773
1032	1042	CVLGQSKRVDF	10	0.216	0.003547		0.2622	0.004639
1032	1046	CVLGQSKRVDFCGKG	14	0.2264	0.003421		0.2243	0.002209
1032	1049	CVLGQSKRVDFCGKGYHL	17	0.1484	0.004094		0.1844	0.005727
1034	1042	LGQSKRVDF	8	0.2221	0.004026		0.2712	0.005252
1034	1049	LGQSKRVDFCGKGYHL	15	0.1515	0.007511		0.1834	0.005779
1035	1042	GQSKRVDF	7	0.2308	0.00378		0.2419	0.003289
1043	1049	CGKGYHL	6	0.0663	0.002582		0.1062	0.007519
1047	1062	YHLMSFPQSAPHGVVF	13	0.0308	0.003825		0.0495	0.001869
1049	1059	LMSFPQSAPHG	8	0.0472	0.001253		0.1481	0.004312
1053	1062	PQSAPHGVVF	7	0.04	0.001113		0.0756	0.005393
1069	1079	PAQEKNFTTAP	8	0.2428	0.018687		0.3294	0.005038
1079	1095	PAICHDGKAHFPREGVF	14	0.0726	0.006135		0.1038	0.007835
1091	1099	REGVFVSNG	8	0.2613	0.004257		0.2963	0.000344
1103	1116	FVTQRNFYEPQIIT	12	0.1713	0.003734		0.2917	0.005171
1103	1117	FVTQRNFYEPQIITT	13	0.1896	0.004299		0.2854	0.005005
1109	1116	FYEPQIIT	6	0.1463	0.005767		0.2427	0.005363
1109	1117	FYEPQIITT	7	0.2012	0.006366		0.2814	0.02488
1110	1117	YEPQIITT	6	0.2339	0.004089		0.3571	0.009501
1118	1127	DNTFVSGNCD	9	0.3292	0.007701		0.3297	0.005785
1121	1127	FVSGNCD	6	0.2299	0.003776		0.2439	0.01303
1136	1145	TVYDPLQPEL	7	0.4157	0.008799		0.3817	0.001367
1148	1169	FKEELDKYFKNHTSPDVDLGDI	20	0.4683	0.003645		0.4887	0.00844
1167	1173	GDISGIN	6	0.3551	0.003988		0.3406	0.004046
1174	1186	ASVVNIQKEIDRL	12	0.5304	0.006274		0.4995	0.004653
1175	1186	SVVNIQKEIDRL	11	0.516	0.004155		0.4956	0.005878
1175	1188	SVVNIQKEIDRLNE	13	0.5483	0.004951		0.529	0.008611
1176	1186	VVNIQKEIDRL	10	0.5128	0.005208		0.4874	0.010867
1177	1188	VNIQKEIDRLNE	11	0.6017	0.010147		0.5804	0.006263
1178	1186	NIQKEIDRL	8	0.5278	0.003048		0.531	0.008008
1179	1188	IQKEIDRLNE	9	0.3323	0.005198		0.3274	0.014307
1187	1197	NEVAKNLNESL	10	0.1211	0.004379		0.1788	0.002139
1201	1213	QELGKYEQVDGSA	12	0.3927	0.002932		0.3788	0.004645

## Sheet: Table S1 (Difference Fig 4)
Table S1: Differences in deuterium exchange for S protein in S:ACE2 complex at indicated labeling times
				S:ACE2 (1 min)			S:ACE2 (10 min)
Start	End	Sequence	MaxUptake	Difference	SD		Difference	SD
21	31	RTQLPPAYTNS	8	0.067	0.058362		-0.0439	0.132702
32	42	FTRGVYYPDKV	9	0.121	0.062		-0.112	0.078
32	48	FTRGVYYPDKVFRSSVL	15	0.1901	0.113881		-0.2262	0.044974
33	42	TRGVYYPDKV	8	-0.0681	0.048759		0.2284	0.118121
36	48	VYYPDKVFRSSVL	11	-0.182	0.114731		0.135	0.041548
49	55	HSTQDLF	6	0.7486	0.047937		0.8431	0.035854
60	83	SNVTWFHAIHVSGTNGTKRFDNPV	22	-0.0543	0.304027		0.1482	0.151354
85	91	PFNDGVY	5	0.0868	0.034604		0.0042	0.045809
92	103	FASTEKSNIIRG	11	0.0089	0.086951		-0.0024	0.056314
92	106	FASTEKSNIIRGWIF	14	-0.0561	0.084641		-0.212	0.050501
92	110	FASTEKSNIIRGWIFGTTL	18	-0.0343	0.10743		-0.0649	0.08087
93	103	ASTEKSNIIRG	10	0.0126	0.030664		0.0514	0.096994
94	103	STEKSNIIRG	9	-0.0229	0.091671		-0.0616	0.042569
95	103	TEKSNIIRG	8	0.3276	0.034222		-0.0183	0.074559
104	110	WIFGTTL	6	0.0884	0.031984		0.0709	0.033506
107	117	GTTLDSKTQSL	10	-0.1511	0.072268		-0.0052	0.187135
111	117	DSKTQSL	6	-0.0648	0.043051		-0.0833	0.050233
111	118	DSKTQSLL	7	-0.213	0.051878		-0.0769	0.029412
136	143	CNDPFLGV	6	-0.0312	0.058437		-0.1516	0.085209
169	176	EYVSQPFL	6	-0.1977	0.096102		-0.2194	0.079491
170	176	YVSQPFL	5	-0.0751	0.055787		-0.0082	0.025298
177	186	MDLEGKQGNF	9	-0.0443	0.113789		0.024	0.111077
177	191	MDLEGKQGNFKNLRE	14	0.1093	0.223075		0.0484	0.170382
178	191	DLEGKQGNFKNLRE	13	0.077	0.110611		0.0951	0.077182
180	191	EGKQGNFKNLRE	11	0.2579	0.097261		-0.0499	0.052996
181	191	GKQGNFKNLRE	10	-0.2107	0.092919		-0.572	0.142935
184	191	GNFKNLRE	7	0.3366	0.110583		0.231	0.072539
192	199	FVFKNIDG	7	-0.0427	0.046196		-0.0374	0.044695
192	200	FVFKNIDGY	8	-0.084	0.06882		0.0023	0.036748
192	201	FVFKNIDGYF	9	0.0099	0.057851		0.0435	0.024881
193	201	VFKNIDGYF	8	-0.0618	0.082456		0.037	0.134413
194	200	FKNIDGY	6	0.0104	0.031367		0.0796	0.041581
194	201	FKNIDGYF	7	0.0192	0.070588		-0.0006	0.019329
195	201	KNIDGYF	6	-0.0798	0.049797		-0.2289	0.071257
200	212	YFKIYSKHTPINL	11	-0.0823	0.061822		0.0256	0.066506
201	212	FKIYSKHTPINL	10	-0.037	0.052192		0.0027	0.033454
213	220	VRDLPQGF	6	-0.0366	0.072857		0.0409	0.03592
213	223	VRDLPQGFSAL	9	-0.0106	0.130934		0.07	0.057778
213	228	VRDLPQGFSALEPLVD	13	0.0708	0.041921		0.0485	0.101399
221	228	SALEPLVD	6	0.1681	0.043197		-0.0016	0.047827
221	229	SALEPLVDL	7	0.1097	0.031752		0.0102	0.061455
242	264	LALHRSYLTPGDSSSGWTAGAAA	21	0.222	0.12105		-0.0234	0.129742
243	255	ALHRSYLTPGDSS	11	0.0735	0.055912		0.4586	0.021063
243	257	ALHRSYLTPGDSSSG	13	0.0026	0.060574		-0.0693	0.289873
245	257	HRSYLTPGDSSSG	11	-0.5092	0.061717		-0.0165	0.140868
245	264	HRSYLTPGDSSSGWTAGAAA	18	-0.3899	0.192599		0.1743	0.074594
245	265	HRSYLTPGDSSSGWTAGAAAY	19	-0.2396	0.110349		0.1847	0.11959
265	271	YYVGYLQ	6	0.5337	0.098395		0.4946	0.090892
265	276	YYVGYLQPRTFL	10	0.2432	0.041053		-0.0313	0.042679
266	276	YVGYLQPRTFL	9	0.1551	0.064403		0.0359	0.052252
267	276	VGYLQPRTFL	8	0.2055	0.063134		0.0192	0.088535
289	303	VDCALDPLSETKCTL	13	0.2938	0.054024		0.322	0.058031
291	299	CALDPLSET	7	0.0547	0.095411		0.0156	0.08657
291	301	CALDPLSETKC	9	0.3886	0.073128		-0.0874	0.05984
291	303	CALDPLSETKCTL	11	0.2123	0.072522		0.0822	0.0237
294	303	DPLSETKCTL	8	0.2975	0.059654		0.062	0.032841
295	303	PLSETKCTL	7	0.1985	0.106382		0.0254	0.084144
304	313	KSFTVEKGIY	9	-0.0679	0.105693		-0.0528	0.105554
304	317	KSFTVEKGIYQTSN	13	-0.0418	0.101427		0.115	0.059976
304	318	KSFTVEKGIYQTSNF	14	-0.116	0.073973		0.0428	0.059381
306	313	FTVEKGIY	7	0.0079	0.196833		0.0595	0.08981
306	317	FTVEKGIYQTSN	11	-0.0126	0.270293		0.1645	0.168668
306	318	FTVEKGIYQTSNF	12	-0.0027	0.172948		0.2347	0.081973
310	318	KGIYQTSNF	8	0.0414	0.10809		-0.0184	0.069889
318	325	FRVQPTES	6	-0.1259	0.085958		0.0014	0.049693
318	326	FRVQPTESI	7	0.2754	0.155133		0.218	0.20281
324	334	ESIVRFPNITN	9	0.1863	0.232167		0.1162	0.232036
327	338	VRFPNITNLCPF	9	0.1588	0.109054		0.4263	0.05063
337	348	PFGEVFNATRFA	10	0.2011	0.025265		-0.0194	0.053593
340	359	EVFNATRFASVYAWNRKRIS	19	-0.4053	0.059626		-0.6773	0.145788
348	361	ASVYAWNRKRISNC	13	0.0714	0.041372		-0.4043	0.231097
351	361	YAWNRKRISNC	10	-0.0498	0.123792		-0.1618	0.112168
356	375	KRISNCVADYSVLYNSASFS	19	0.0865	0.127819		0.186	0.095918
375	387	STFKCYGVSPTKL	11	-0.173	0.082761		0.0449	0.048467
377	387	FKCYGVSPTKL	9	0.0745	0.158409		0.0164	0.125057
378	387	KCYGVSPTKL	8	-0.2427	0.117322		-0.2016	0.044694
386	407	KLNDLCFTNVYADSFVIRGDEV	21	0.1001	0.136729		-0.0764	0.039775
393	399	TNVYADS	6	0.0971	0.027866		0.0309	0.041849
393	400	TNVYADSF	7	0.0278	0.034902		-0.2759	0.076426
400	406	FVIRGDE	6	-0.1283	0.027269		-0.1933	0.019075
400	416	FVIRGDEVRQIAPGQTG	15	-0.101	0.071866		0.1776	0.184398
400	421	FVIRGDEVRQIAPGQTGKIADY	20	-0.4288	0.101357		-0.692	0.04703
400	422	FVIRGDEVRQIAPGQTGKIADYN	21	-0.1943	0.203717		-0.6049	0.140949
401	420	VIRGDEVRQIAPGQTGKIAD	18	-0.2156	0.080601		-0.6559	0.127774
401	421	VIRGDEVRQIAPGQTGKIADY	19	-0.0655	0.175333		-0.611	0.340697
402	413	IRGDEVRQIAPG	10	-0.2911	0.112487		-0.3364	0.079793
407	420	VRQIAPGQTGKIAD	12	-0.1494	0.117872		-0.4383	0.062576
407	421	VRQIAPGQTGKIADY	13	-0.0422	0.114649		-0.4924	0.065793
407	422	VRQIAPGQTGKIADYN	14	-0.0961	0.116211		-0.5241	0.040705
412	420	PGQTGKIAD	7	-0.1425	0.088899		-0.3083	0.061061
421	429	YNYKLPDDF	7	0.0165	0.042421		-0.2098	0.028637
422	431	NYKLPDDFTG	8	0.0018	0.05219		-0.0806	0.0544
423	429	YKLPDDF	5	-0.0968	0.03333		-0.1484	0.037764
423	431	YKLPDDFTG	7	-0.044	0.026854		-0.0915	0.037701
425	431	LPDDFTG	5	-0.005	0.054108		-0.0742	0.092903
432	441	CVIAWNSNNL	9	-0.1399	0.072955		0.0322	0.030195
433	448	VIAWNSNNLDSKVGGN	15	-0.0963	0.044178		0.0293	0.058696
434	441	IAWNSNNL	7	0.0085	0.118538		-0.0297	0.064645
442	449	DSKVGGNY	7	-0.0955	0.078724		0.022	0.052459
442	452	DSKVGGNYNYL	10	-0.2602	0.142588		0.0305	0.065075
444	452	KVGGNYNYL	8	-0.3541	0.078038		-0.3236	0.071659
453	467	YRLFRKSNLKPFERD	13	-0.4352	0.26117		-0.6291	0.160981
456	467	FRKSNLKPFERD	10	0.0284	0.080786		-0.4109	0.076366
456	469	FRKSNLKPFERDIS	12	-0.0623	0.063532		-0.3924	0.112301
456	470	FRKSNLKPFERDIST	13	-0.1178	0.073208		-0.301	0.077048
456	471	FRKSNLKPFERDISTE	14	-0.0121	0.149081		-0.177	0.143463
471	486	EIYQAGSTPCNGVEGF	14	-0.2268	0.24382		0.1118	0.11576
471	487	EIYQAGSTPCNGVEGFN	15	-0.2829	0.178978		0.0514	0.265106
472	486	IYQAGSTPCNGVEGF	13	-0.1996	0.251391		0.1137	0.166967
472	487	IYQAGSTPCNGVEGFN	14	-0.1111	0.209764		0.1267	0.144387
476	498	GSTPCNGVEGFNCYFPLQSYGFQ	20	-0.9644	0.268771		-0.5294	0.156722
477	500	STPCNGVEGFNCYFPLQSYGFQPT	20	-1.1555	0.073715		-0.8063	0.052638
479	486	PCNGVEGF	6	-0.0955	0.227737		-0.1394	0.122879
487	494	NCYFPLQS	6	-0.1856	0.050843		-0.2721	0.050642
487	495	NCYFPLQSY	7	-0.1839	0.040036		-0.3677	0.088323
488	495	CYFPLQSY	6	-0.2258	0.065365		-0.4274	0.070892
488	496	CYFPLQSYG	7	-0.1906	0.207307		-0.4429	0.081082
488	502	CYFPLQSYGFQPTNG	12	-0.304	0.13589		-0.408	0.079968
490	512	FPLQSYGFQPTNGVGYQPYRVVV	19	-0.7503	0.095766		-0.2358	0.154172
491	510	PLQSYGFQPTNGVGYQPYRV	16	-0.9122	0.148221		-0.4265	0.085015
491	512	PLQSYGFQPTNGVGYQPYRVVV	18	-0.6019	0.103026		-0.2949	0.044968
495	510	YGFQPTNGVGYQPYRV	13	-0.6319	0.062284		-0.3605	0.060334
495	512	YGFQPTNGVGYQPYRVVV	15	-0.6182	0.16287		-0.1909	0.051362
495	513	YGFQPTNGVGYQPYRVVVL	16	-0.5545	0.144046		-0.239	0.091333
496	510	GFQPTNGVGYQPYRV	12	-0.5377	0.164512		-0.1777	0.065282
503	510	VGYQPYRV	6	-0.3522	0.057659		-0.191	0.026457
514	533	SFELLHAPATVCGPKKSTNL	17	-0.094	0.205974		0.0116	0.171276
515	533	FELLHAPATVCGPKKSTNL	16	0.0338	0.194471		0.1542	0.09725
516	533	ELLHAPATVCGPKKSTNL	15	-0.117	0.155081			NaN
517	532	LLHAPATVCGPKKSTN	13	0.274	0.268152		-0.0169	0.246537
517	533	LLHAPATVCGPKKSTNL	14	0.0608	0.272935		0.1691	0.16966
518	533	LHAPATVCGPKKSTNL	13	0.0959	0.27949		0.0547	0.189955
521	533	PATVCGPKKSTNL	10	-0.0406	0.20421		0.0456	0.197428
534	541	VKNKCVNF	7	0.0986	0.013621		-0.1164	0.016244
542	552	NFNGLTGTGVL	10	0.2729	0.120098		0.0994	0.08722
543	555	FNGLTGTGVLTES	12	0.2451	0.177231		0.0095	0.03301
544	552	NGLTGTGVL	8	-0.1012	0.091252		-0.1536	0.071301
546	552	LTGTGVL	6	0.2086	0.050055		-0.0461	0.038724
553	564	TESNKKFLPFQQ	10	-0.1876	0.082785		0.1406	0.049175
553	565	TESNKKFLPFQQF	11	-0.2443	0.165861		0.0871	0.046829
553	568	TESNKKFLPFQQFGRD	14	-0.1781	0.106468		0.0467	0.063829
555	568	SNKKFLPFQQFGRD	12	-0.1625	0.21488		-0.0206	0.131022
569	575	IADTTDA	6	0.2703	0.028726		0.3627	0.043333
569	581	IADTTDAVRDPQT	11	0.1439	0.016088		-0.1416	0.032359
569	582	IADTTDAVRDPQTL	12	0.2086	0.088484		0.0499	0.029676
569	583	IADTTDAVRDPQTLE	13	0.6448	0.183095		0.0945	0.101293
575	582	AVRDPQTL	6	0.2406	0.06024		-0.0098	0.039794
575	583	AVRDPQTLE	7	0.4464	0.09605		0.0723	0.042142
576	582	VRDPQTL	5	-0.0752	0.102076		-0.2847	0.058996
576	583	VRDPQTLE	6	0.2619	0.02935		0.0395	0.043648
584	592	ILDITPCSF	7	0.1103	0.089217		-0.0266	0.033059
584	596	ILDITPCSFGGVS	11	0.0732	0.123379		-0.0735	0.095908
585	592	LDITPCSF	6	-0.0372	0.06812		-0.1016	0.033285
586	592	DITPCSF	5	0.1831	0.055486		0.0444	0.03168
586	596	DITPCSFGGVS	9	0.0134	0.052563		-0.0022	0.030818
599	615	TPGTNTSNQVAVLYQDV	15	-0.2143	0.212955		-0.0192	0.12875
617	632	CTEVPVAIHADQLTPT	13	1.5331	0.068717		1.785	0.116192
621	633	PVAIHADQLTPTW	10	-0.0813	0.133585		0.0974	0.107144
627	633	DQLTPTW	5	-0.0748	0.085556		0.0005	0.032997
627	635	DQLTPTWRV	7	-0.1577	0.136575		0.0722	0.071233
627	643	DQLTPTWRVYSTGSNVF	15	0.1105	0.097154		0.1401	0.144119
634	642	RVYSTGSNV	8	-0.0887	0.105163		-0.0702	0.065833
634	643	RVYSTGSNVF	9	-0.0518	0.134208		0.0437	0.048208
636	642	YSTGSNV	6	-0.1341	0.066561		0.0387	0.095116
636	643	YSTGSNVF	7	-0.0491	0.103171		0.0798	0.095174
642	650	VFQTRAGCL	8	-0.0224	0.12294		-0.0411	0.074398
643	650	FQTRAGCL	7	-0.0513	0.070743		-0.1788	0.04873
644	650	QTRAGCL	6	0.0721	0.110701		-0.0785	0.071205
648	665	GCLIGAEHVNNSYECDIP	16	0.1123	0.111778		0.0729	0.103489
662	671	CDIPIGAGIC	8	0.0058	0.059193		0.0461	0.017732
664	671	IPIGAGIC	6	0.1143	0.092323		0.1119	0.069095
664	673	IPIGAGICAS	8	0.2389	0.037165		0.2036	0.050564
665	671	PIGAGIC	5	0.0489	0.131445		0.0521	0.033486
672	686	ASYQTQTNSPGSASS	13	-0.2703	0.06594		-0.3954	0.07102
672	690	ASYQTQTNSPGSASSVASQ	17	0.2553	0.250888		0.3089	0.121388
672	692	ASYQTQTNSPGSASSVASQSI	19	0.4263	0.252775		0.4342	0.091079
672	694	ASYQTQTNSPGSASSVASQSIIA	21	0.3574	0.190117		0.527	0.121172
673	690	SYQTQTNSPGSASSVASQ	16	0.3364	0.163211		0.224	0.195306
674	690	YQTQTNSPGSASSVASQ	15	0.1191	0.25357		0.1363	0.128839
674	694	YQTQTNSPGSASSVASQSIIA	19	0.105	0.268536		0.6402	0.153871
675	690	QTQTNSPGSASSVASQ	14	-0.1134	0.057184		0.4139	0.078358
675	694	QTQTNSPGSASSVASQSIIA	18	-0.1529	0.051454		0.0923	0.038895
688	695	ASQSIIAY	7	0.1704	0.072699		-0.1059	0.066996
693	699	IAYTMSL	6	-0.2001	0.062559		0.1122	0.103603
695	702	YTMSLGAE	7	-0.1095	0.115937		0.0979	0.062717
696	704	TMSLGAENS	8	-0.0923	0.14283		-0.0276	0.097735
700	706	GAENSVA	6	-0.1274	0.023877		0.0555	0.038781
715	730	PTNFTISVTTEILPVS	13	-0.0852	0.021967		-0.3104	0.077901
724	731	TEILPVSM	6	-0.0713	0.037305		-0.0585	0.032066
725	731	EILPVSM	5	-0.0259	0.02503		-0.0403	0.034129
728	739	PVSMTKTSVDCT	10	0.1228	0.132589		0.2303	0.130516
732	739	TKTSVDCT	7	0.0694	0.056084		0.0032	0.02486
732	741	TKTSVDCTMY	9	0.3057	0.122653		0.0884	0.079089
740	748	MYICGDSTE	8	-0.0284	0.065196		0.0906	0.051471
741	748	YICGDSTE	7	-0.1418	0.063052		-0.1218	0.082684
742	748	ICGDSTE	6	0.0661	0.045896		0.0142	0.043256
753	759	LLQYGSF	6	-0.2216	0.076481		-0.1093	0.049584
763	769	LNRALTG	6	0.0457	0.048678		-0.062	0.033809
764	771	NRALTGIA	7	0.0103	0.031298		-0.0392	0.0284
770	780	IAVEQDKNTQE	10	0.1947	0.070421		-0.1164	0.034576
770	781	IAVEQDKNTQEV	11	0.0805	0.056966		-0.1654	0.06504
770	782	IAVEQDKNTQEVF	12	0.0243	0.018564		-0.1317	0.030735
774	782	QDKNTQEVF	8	0.1572	0.015342		-0.1407	0.015092
781	802	VFAQVKQIYKTPPIKDFGGFNF	19	-0.0712	0.222181		0.1581	0.107156
783	796	AQVKQIYKTPPIKD	11	-0.1525	0.099127		0.0821	0.04495
784	796	QVKQIYKTPPIKD	10	-0.0621	0.199652		0.1038	0.100266
800	815	FNFSQILPDPSKPSKR	12	-0.091	0.085		-0.121	0.062
821	828	LLFNKVTL	7	-0.1883	0.091456		0.0179	0.026853
822	828	LFNKVTL	6	-0.19	0.112116		0.0267	0.06026
822	833	LFNKVTLADAGF	11	-0.6422	0.184913		0.601	0.085787
823	832	FNKVTLADAG	9	-0.341	0.097506		0.0037	0.072936
823	833	FNKVTLADAGF	10	-0.2258	0.096311		0.1747	0.039656
824	833	NKVTLADAGF	9	-0.2148	0.081857		0.1792	0.074269
833	841	FIKQYGDCL	8	-0.0309	0.099025		-0.0576	0.106854
834	840	IKQYGDC	6	0.0277	0.067011		-0.0104	0.08854
834	841	IKQYGDCL	7	-0.2299	0.066398		-0.0602	0.047947
834	848	IKQYGDCLGDIAARD	14	-0.5864	0.119512		0.1335	0.046427
842	848	GDIAARD	6	-0.274	0.093161		-0.0445	0.059033
848	862	DLICAQKFNGLTVLP	13	-0.0722	0.072676		-0.3576	0.047557
852	858	AQKFNGL	6	-0.0033	0.078269		-0.0032	0.038331
858	865	LTVLPPLL	5	-0.2416	0.074027		-0.0007	0.020528
858	866	LTVLPPLLT	6	-0.3533	0.090187		-0.0376	0.036445
859	865	TVLPPLL	4	-0.1512	0.038385		-0.0408	0.030082
859	866	TVLPPLLT	5	-0.2166	0.061616		0.0045	0.048881
870	877	IAQYTSAL	7	-0.031	0.048367		-0.0477	0.050039
877	885	LLAGTITSG	8	-0.0423	0.101425		-0.0023	0.100651
877	886	LLAGTITSGW	9	-0.1846	0.073459		0.0596	0.070063
878	885	LAGTITSG	7	-0.0948	0.102799		-0.1081	0.038247
878	891	LAGTITSGWTFGAG	13	-0.0945	0.120846		-0.0617	0.097268
878	893	LAGTITSGWTFGAGAA	15	-0.056	0.160209		-0.0637	0.166521
886	893	WTFGAGAA	7	0.0207	0.022032		0.1286	0.038963
886	898	WTFGAGAALQIPF	11	0.2268	0.096362		-0.1682	0.063494
889	898	GAGAALQIPF	8	0.0936	0.066145		-0.0876	0.061099
892	899	AALQIPFA	6	-0.4054	0.066371		-0.1688	0.047298
892	901	AALQIPFAMQ	8	-0.3407	0.165346		0.0688	0.062575
892	902	AALQIPFAMQM	9	-0.3729	0.0706		0.0914	0.116292
894	901	LQIPFAMQ	6	0.1151	0.05973		0.1682	0.034761
894	902	LQIPFAMQM	7	-0.2348	0.106072		0.0129	0.054518
902	916	MAYRFNGIGVTQNVL	14	0.2937	0.153909		0.0175	0.069226
903	916	AYRFNGIGVTQNVL	13	0.1351	0.135565		0.2905	0.056235
904	916	YRFNGIGVTQNVL	12	0.1133	0.144569		-0.1511	0.045423
905	916	RFNGIGVTQNVL	11	-0.0812	0.221623		-0.1673	0.081465
907	913	NGIGVTQ	6	0.0962	0.017619		0.0014	0.01034
907	916	NGIGVTQNVL	9	0.1295	0.116494		0.18	0.078094
909	916	IGVTQNVL	7	0.1012	0.094371		0.1369	0.075961
917	924	YENQKLIA	7	-0.0794	0.019784		0.0602	0.068065
923	930	IANQFNSA	7	0.0853	0.028839		-0.1676	0.03124
923	938	IANQFNSAIGKIQDSL	15	-0.016	0.131119		-0.2184	0.179238
923	941	IANQFNSAIGKIQDSLSST	18	-0.5419	0.124189		-0.1348	0.183729
923	945	IANQFNSAIGKIQDSLSSTASAL	22	-0.1461	0.08061		0.2248	0.10093
925	938	NQFNSAIGKIQDSL	13	0.173	0.081594		0.1425	0.126365
927	945	FNSAIGKIQDSLSSTASAL	18	-0.2721	0.093048		0.4169	0.068666
928	936	NSAIGKIQD	8	0.3282	0.169424		-0.0102	0.160148
928	938	NSAIGKIQDSL	10	-0.0375	0.083003		0.1259	0.13355
928	945	NSAIGKIQDSLSSTASAL	17	-0.1677	0.082628		0.3821	0.139763
931	938	IGKIQDSL	7	1.1394	0.041924		1.4922	0.08463
932	943	GKIQDSLSSTAS	11	-0.8413	0.172179		-0.3515	0.090255
937	945	SLSSTASAL	8	-0.2025	0.067247		0.0727	0.049028
939	945	SSTASAL	6	-0.1038	0.108946		0.0597	0.057588
939	956	SSTASALGKLQDVVNQNA	17	-0.3388	0.270081		0.5061	0.130653
939	961	SSTASALGKLQDVVNQNAQALNT	22	-0.5614	0.33692		0.2932	0.245492
946	954	GKLQDVVNQ	8	-0.426	0.102612		-0.5727	0.047357
946	961	GKLQDVVNQNAQALNT	15	-0.3497	0.191934		0.1554	0.094585
951	959	VVNQNAQAL	8	-0.3908	0.099152		-0.0292	0.07523
951	961	VVNQNAQALNT	10	-0.3439	0.170605		-0.0799	0.078128
960	970	NTLVKQLSSNF	10	-0.0751	0.023877		0.4589	0.044119
962	969	LVKQLSSN	7	-0.2451	0.10657		-0.0503	0.03886
962	970	LVKQLSSNF	8	-0.1925	0.131579		0.0451	0.08184
962	974	LVKQLSSNFGAIS	12	-0.2897	0.057949		-0.0867	0.080595
962	977	LVKQLSSNFGAISSVL	15	-0.2772	0.23737		-0.015	0.230281
963	970	VKQLSSNF	7	-0.4857	0.105358		0.0415	0.070359
964	970	KQLSSNF	6	-0.8163	0.026119		0.0704	0.035662
970	977	FGAISSVL	7	-0.324	0.055789		0.0708	0.077537
971	977	GAISSVL	6	-0.2846	0.053595		-0.0539	0.053151
980	990	ILSRLDPPEAE	8	-0.1742	0.019783		0.0113	0.046842
980	992	ILSRLDPPEAEVQ	10	-0.051	0.098622		0.0506	0.077315
982	989	SRLDPPEA	5	-0.3356	0.037294		0.0235	0.070536
982	990	SRLDPPEAE	6	-0.1593	0.063504		-0.0001	0.043087
982	992	SRLDPPEAEVQ	8	-0.2529	0.111499		0.0327	0.06488
990	996	EVQIDRL	6	-0.0909	0.198255		0.0427	0.151231
993	1001	IDRLITGRL	8	-0.1778	0.085031		0.025	0.050724
994	1001	DRLITGRL	7	-0.0608	0.073831		0.0072	0.042007
997	1006	ITGRLQSLQT	9	-0.1624	0.112392		-0.3783	0.173771
1018	1024	IRASANL	6	-0.0645	0.060283		-0.242	0.243647
1025	1031	AATKMSE	6	0.0627	0.04778		-0.1016	0.059757
1032	1042	CVLGQSKRVDF	10	-0.1103	0.105173		-0.0169	0.083416
1032	1046	CVLGQSKRVDFCGKG	14	-0.0013	0.167674		0.0454	0.093546
1032	1049	CVLGQSKRVDFCGKGYHL	17	-0.0392	0.143998		-0.0539	0.038127
1034	1042	LGQSKRVDF	8	-0.163	0.08426		-0.0145	0.068847
1034	1049	LGQSKRVDFCGKGYHL	15	-0.1047	0.170229		0.169	0.0842
1035	1042	GQSKRVDF	7	-0.1047	0.043451		0.2064	0.070584
1043	1049	CGKGYHL	6	0.0331	0.02793		-0.0778	0.021653
1047	1062	YHLMSFPQSAPHGVVF	13	0.054	0.09092		-0.3947	0.201992
1049	1059	LMSFPQSAPHG	8	-0.1235	0.022015		-0.185	0.015844
1053	1062	PQSAPHGVVF	7	-0.0243	0.055915		-0.1614	0.041815
1069	1079	PAQEKNFTTAP	8	-0.0175	0.169775		0.1551	0.231822
1079	1095	PAICHDGKAHFPREGVF	14	0.0595	0.116017		-0.0502	0.110855
1091	1099	REGVFVSNG	8	-0.0217	0.104232		0.0953	0.083644
1103	1116	FVTQRNFYEPQIIT	12	-0.0596	0.104048		-0.1576	0.008957
1103	1117	FVTQRNFYEPQIITT	13	-0.083	0.128571		-0.0249	0.067275
1109	1116	FYEPQIIT	6	0.0731	0.041834		0.0188	0.061225
1109	1117	FYEPQIITT	7	-0.0557	0.047511		-0.0337	0.050687
1110	1117	YEPQIITT	6	-0.0156	0.062092		-0.3296	0.193021
1118	1127	DNTFVSGNCD	9	-0.0975	0.076661		-0.0999	0.135602
1121	1127	FVSGNCD	6	-0.0325	0.057628		-0.0459	0.059028
1136	1145	TVYDPLQPEL	7	-0.3179	0.146524		0.283	0.092447
1148	1169	FKEELDKYFKNHTSPDVDLGDI	20	-0.474	0.274467		0.1066	0.028148
1167	1173	GDISGIN	6	-0.1569	0.07143		0.067	0.064908
1174	1186	ASVVNIQKEIDRL	12	-0.7337	0.119612		0.165	0.107399
1175	1186	SVVNIQKEIDRL	11	-0.5235	0.183541		0.1331	0.083673
1175	1188	SVVNIQKEIDRLNE	13	-0.3767	0.149122		0.0641	0.080614
1176	1186	VVNIQKEIDRL	10	-0.7728	0.245957		0.0121	0.100162
1177	1188	VNIQKEIDRLNE	11	-0.2986	0.176228		0.2276	0.120367
1178	1186	NIQKEIDRL	8	-0.4158	0.19992		-0.028	0.113973
1179	1188	IQKEIDRLNE	9	-0.2485	0.074578		-0.0328	0.118619
1187	1197	NEVAKNLNESL	10	0.1083	0.109305		-0.0883	0.152389
1201	1213	QELGKYEQVDGSA	12	-0.0651	0.052564		0.0306	0.118297

## Sheet: Table S2 (RFU)
	Table S2: Relative Fractional Uptake at different labeling times for various pepsin digest fragments of RBDisolated
					RBD(isolated)
					1 min			10 min			100 min
Start	End	Sequence	MaxUptake	MHP	Uptake	Uptake SD		Uptake	Uptake SD		Uptake	Uptake SD
323	330	TESIVRFP	6	948.515	0.281	0.00297068		0.2723	0.00297068		0.3119	0.00664558
324	334	ESIVRFPNITN	9	1289.68	0.1121	0.0134234		0.1777	0.0134234		0.2626	0.00417996
351	361	YAWNRKRISNC	10	1410.71	0.109	0.00164707		0.1557	0.00164707		0.2315	0.00429312
352	361	AWNRKRISNC	9	1247.64	0.0917	0.00478762		0.1516	0.00478762		0.2087	0.00626965
353	361	WNRKRISNC	8	1176.61	0.1143	0.00734562		0.1995	0.00734562		0.2986	0.0175611
365	378	YSVLYNSASFSTFK	13	1613.78	0.0481	0.00280558		0.077	0.00280558		0.1454	0.0105738
369	393	YNSASFSTFKCYGVSPTKLNDLCFT	23	2793.29	0.2511	0.012643		0.2806	0.012643		0.3159	0.00147038
374	387	FSTFKCYGVSPTKL	12	1577.8	0.2092	0.0187422		0.1967	0.0187422		0.1957	0.0146401
375	387	STFKCYGVSPTKL	11	1430.73	0.2603	0.0102266		0.2861	0.0102266		0.3383	0.00585917
377	387	FKCYGVSPTKL	9	1242.66	0.313	0.0256652		0.3288	0.0256652		0.342	0.00221682
378	387	KCYGVSPTKL	8	1095.59	0.2998	0.0537923		0.3097	0.0537923		0.342	0.0114214
384	404	PTKLNDLCFTNVYADSFVIRG	19	2373.19	0.2568	0.00057577		0.3177	0.00057577		0.3426	0.00057577
388	395	NDLCFTNV	7	925.408	0.1886	0.0197142		0.1937	0.0197142		0.2175	0.00361856
392	399	FTNVYADS	7	916.405	0.0507	0.00185361		0.1567	0.00185361		0.2544	0.00186935
393	399	TNVYADS	6	769.336	0.0652	0.00619097		0.1782	0.00619097		0.2949	0.00465984
393	400	TNVYADSF	7	916.405	0.0469	0.00290797		0.1129	0.00290797		0.2015	0.00538142
400	406	FVIRGDE	6	835.431	0.0198	0.0012642		0.0551	0.0012642		0.126	0.00393357
400	407	FVIRGDEV	7	934.499	0.032	0.00109488		0.0945	0.00109488		0.2035	0.00260704
400	420	FVIRGDEVRQIAPGQTGKIAD	19	2270.23	0.1366	0.00161722		0.203	0.00161722		0.3299	0.00565264
400	421	FVIRGDEVRQIAPGQTGKIADY	20	2433.29	0.1043	0.00838494		0.1963	0.00838494		0.3242	0.00674351
401	420	VIRGDEVRQIAPGQTGKIAD	18	2123.16	0.1388	0.0109981		0.2327	0.0109981		0.3506	0.00408493
401	421	VIRGDEVRQIAPGQTGKIADY	19	2286.22	0.1547	0.0123468		0.2112	0.0123468		0.3452	0.00129246
407	420	VRQIAPGQTGKIAD	12	1453.81	0.147	0.0161496		0.2318	0.0161496		0.3321	0.00386853
407	422	VRQIAPGQTGKIADYN	14	1730.92	0.1776	0.0132154		0.2468	0.0132154		0.3457	0.00352225
408	420	RQIAPGQTGKIAD	11	1354.74	0.1284	0.0127957		0.2049	0.0127957		0.3225	0.012476
408	422	RQIAPGQTGKIADYN	13	1631.85	0.1485	0.00938025		0.2274	0.00938025		0.3297	0.00163104
412	420	PGQTGKIAD	7	886.463	0.1906	0.0115627		0.2591	0.0115627		0.367	0.00216663
412	421	PGQTGKIADY	8	1049.53	0.1491	0.00335889		0.2219	0.00335889		0.3479	0.00364115
415	421	TGKIADY	6	767.393	0.1772	0.00465636		0.2509	0.00465636		0.3732	0.0534844
415	422	TGKIADYN	7	881.436	0.1729	0.0152737		0.2379	0.0152737		0.3795	0.00876363
421	428	YNYKLPDD	6	1027.47	0.0493	0.00285693		0.1042	0.00285693		0.2808	0.00827389
421	429	YNYKLPDDF	7	1174.54	0.073	0.007245		0.1145	0.007245		0.2535	0.00830422
421	431	YNYKLPDDFTG	9	1332.61	0.0924	0.00650779		0.1275	0.00650779		0.2608	0.00398356
421	433	YNYKLPDDFTGCV	11	1534.69	0.0744	0.00456409		0.1007	0.00456409		0.1697	0.0459969
423	429	YKLPDDF	5	897.435	0.0996	0.00950138		0.1166	0.00950138		0.2256	0.00461005
423	431	YKLPDDFTG	7	1055.5	0.105	0.010444		0.112	0.010444		0.1906	0.00482803
430	441	TGCVIAWNSNNL	11	1291.61	0.1911	0.00075936		0.1831	0.00075936		0.2192	0.00416874
432	441	CVIAWNSNNL	9	1133.54	0.1869	0.0181137		0.1821	0.0181137		0.2241	0.00244565
432	443	CVIAWNSNNLDS	11	1335.6	0.3149	0.00308392		0.2827	0.00308392		0.2906	0.00308392
433	441	VIAWNSNNL	8	1030.53	0.2095	0.00878673		0.1836	0.00878673		0.223	0.00489965
434	441	IAWNSNNL	7	931.463	0.2258	0.0302137		0.2239	0.0302137		0.2371	0.0024814
442	449	DSKVGGNY	7	839.389	0.3064	0.0249971		0.3161	0.0249971		0.3172	0.00168684
443	452	SKVGGNYNYL	9	1114.55	0.3001	0.0118742		0.3068	0.0118742		0.3145	0.00615604
444	452	KVGGNYNYL	8	1027.52	0.2855	0.0254694		0.3323	0.0254694		0.3377	0.00124229
456	467	FRKSNLKPFERD	10	1536.83	0.0488	0.004306		0.1614	0.004306		0.2193	0.00330414
456	470	FRKSNLKPFERDIST	13	1837.99	0.1522	0.0127915		0.2614	0.0127915		0.3224	0.00720015
460	467	NLKPFERD	6	1018.53	0.4431	0.0280737		0.452	0.0280737		0.4732	0.0103438
471	482	EIYQAGSTPCNG	10	1239.53	0.2907	0.0348136		0.2898	0.0348136		0.2821	0.00105802
471	486	EIYQAGSTPCNGVEGF	14	1671.73	0.3008	0.00164735		0.2555	0.00164735		0.2623	0.00552953
471	487	EIYQAGSTPCNGVEGFN	15	1785.77	0.2635	0.00136193		0.2845	0.00136193		0.2722	0.0136374
472	486	IYQAGSTPCNGVEGF	13	1542.69	0.2607	0.00105401		0.3106	0.00105401		0.3503	0.00153791
472	487	IYQAGSTPCNGVEGFN	14	1656.73	0.2818	0.0014468		0.2827	0.0014468		0.2814	0.00508447
487	494	NCYFPLQS	6	971.429	0.2449	0.0226515		0.3579	0.0226515		0.4242	0.00589179
487	495	NCYFPLQSY	7	1134.49	0.2227	0.0204999		0.3647	0.0204999		0.4147	0.0088801
487	496	NCYFPLQSYG	8	1191.51	0.2343	0.00065053		0.36	0.00065053		0.4094	0.0185449
487	502	NCYFPLQSYGFQPTNG	13	1835.81	0.3432	0.0196651		0.4088	0.0196651		0.4485	0.00631445
488	494	CYFPLQS	5	857.386	0.2204	0.0199185		0.3498	0.0199185		0.431	0.00380758
488	495	CYFPLQSY	6	1020.45	0.1961	0.00128548		0.3546	0.00128548		0.4176	0.00671842
488	502	CYFPLQSYGFQPTNG	12	1721.76	0.2558	0.0210372		0.3382	0.0210372		0.347	0.00358589
490	510	FPLQSYGFQPTNGVGYQPYRV	17	2418.19	0.2464	0.0009027		0.3405	0.0009027		0.379	0.0012588
491	510	PLQSYGFQPTNGVGYQPYRV	16	2271.12	0.2504	0.0233843		0.3209	0.0233843		0.3469	0.00767767
491	512	PLQSYGFQPTNGVGYQPYRVVV	18	2469.26	0.2092	0.00026883		0.2769	0.00026883		0.3033	0.00310655
495	512	YGFQPTNGVGYQPYRVVV	15	2044.03	0.2051	0.00090322		0.213	0.00090322		0.2566	0.0011816
495	513	YGFQPTNGVGYQPYRVVVL	16	2157.11	0.2001	0.00099254		0.2016	0.00099254		0.2435	0.00247328
496	510	GFQPTNGVGYQPYRV	12	1682.83	0.2046	0.00731687		0.2118	0.00731687		0.2451	0.020167
496	512	GFQPTNGVGYQPYRVVV	14	1880.97	0.1916	0.0222265		0.1952	0.0222265		0.2304	0.00200663
503	510	VGYQPYRV	6	981.515	0.162	0.0169469		0.1717	0.0169469		0.2421	0.00688703
503	512	VGYQPYRVVV	8	1179.65	0.113	0.00899484		0.1236	0.00899484		0.1726	0.0150611
503	513	VGYQPYRVVVL	9	1292.74	0.0734	0.011162		0.0802	0.011162		0.1106	0.00399118
514	533	SFELLHAPATVCGPKKSTNL	17	2113.11	0.1852	0.0250689		0.2073	0.0250689		0.2083	0.00481784
515	533	FELLHAPATVCGPKKSTNL	16	2026.08	0.2111	0.0008566		0.2009	0.0008566		0.2037	0.00580725
516	532	ELLHAPATVCGPKKSTN	14	1765.93	0.2115	0.00185594		0.1989	0.00185594		0.206	0.00266156
517	533	LLHAPATVCGPKKSTNL	14	1749.97	0.1718	0.0030298		0.1835	0.0030298		0.1832	0.00430881
518	532	LHAPATVCGPKKSTN	12	1523.8	0.2048	0.0172759		0.2193	0.0172759		0.2014	0.00225297
518	533	LHAPATVCGPKKSTNL	13	1636.88	0.1593	0.00220561		0.1552	0.00220561		0.1608	0.00363989
519	533	HAPATVCGPKKSTNL	12	1523.8	0.2586	0.0231772		0.2514	0.0231772		0.2577	0.00597736
523	533	TVCGPKKSTNL	9	1147.61	0.2227	0.0141069		0.2259	0.0141069		0.246	0.00345894
534	541	VKNKCVNF	7	951.508	0.1994	0.00476533		0.2255	0.00476533		0.2437	0.00596601
542	552	NFNGLTGTGVL	10	1092.57	0.2256	0.0293071		0.2174	0.0293071		0.2242	0.0294677
544	552	NGLTGTGVL	8	831.457	0.2752	0.0274715		0.2715	0.0274715		0.2772	0.00541064
546	552	LTGTGVL	6	660.393	0.3086	0.024766		0.309	0.024766		0.3202	0.00399505
553	565	TESNKKFLPFQQF	11	1613.83	0.2598	0.0345552		0.2706	0.0345552		0.273	0.00936684
553	568	TESNKKFLPFQQFGRD	14	1941.98	0.2246	0.0248215		0.2427	0.0248215		0.2406	0.00209832
555	568	SNKKFLPFQQFGRD	12	1711.89	0.2374	0.0119755		0.23	0.0119755		0.2512	0.012021
567	583	RDIADTTDAVRDPQTLE	15	1915.94	0.1306	0.0175261		0.1858	0.0175261		0.1921	0.00364757
569	575	IADTTDA	6	706.325	0.2158	0.0235619		0.2198	0.0235619		0.2229	0.00107986
569	583	IADTTDAVRDPQTLE	13	1644.81	0.3445	0.0270869		0.3644	0.0270869		0.3705	0.00636053
575	582	AVRDPQTL	6	899.495	0.3546	0.00263246		0.3711	0.00263246		0.3775	0.00458149
575	583	AVRDPQTLE	7	1028.54	0.394	0.00071265		0.4229	0.00071265		0.4451	0.0027907
575	584	AVRDPQTLEI	8	1141.62	0.3313	0.00032097		0.3449	0.00032097		0.3515	0.0289969
576	582	VRDPQTL	5	828.457	0.3964	0.027151		0.3976	0.027151		0.4149	0.0043616
576	583	VRDPQTLE	6	957.5	0.4158	0.0284985		0.4207	0.0284985		0.4347	0.00530451

[truncated: 2 more sheets: Table S4 (RFU of ACE), Table S4 (Differences of ACE)]
